# Supplementary material for: Ectopic expression of the AtCDF1 transcription factor in potato enhances tuber starch and amino acid contents and yield under open field conditions
Source: Front Plant Sci. 2023 Mar 1;14:1010669. doi: 10.3389/fpls.2023.1010669 (PMC10014720; doi:10.3389/fpls.2023.1010669)
Supplement: Supplementary file 7 [file Table_1.xlsx]

## Sheet: Hoja1
Supplemental table S1. Differentially expressed proteins (DEPs) identified in the proteome analyses of tubers of 35S::AtCDF1 and WT plants. DEPs that are discussed in the main text are highlighted in orange.
contrast	log2_fold_change	pvalue	evalue	qvalue	num_replicates	num_peptides	GENE NAME	inferred_proteins	description			inferred_proteins
CDF/WT	1.947	0.00079916	1.11	0.033	4	1	PGSC0003DMG400018914	M1BMR5	M1BMR5|M1BMR5_SOLTU Uncharacterized protein OS=Solanum tuberosum OX=4113 PE=4 SV=1			M1BMR5
CDF/WT	1.707	0.00136428	1.89	0.029	3	1	PGSC0003DMG400035647	M1DAX8	M1DAX8|M1DAX8_SOLTU Dirigent protein OS=Solanum tuberosum OX=4113 PE=3 SV=1			M1DAX8
CDF/WT	1.697	0.00214442	2.98	0.027	2	1	PGSC0003DMG400029264	M1CUT1	M1CUT1|M1CUT1_SOLTU Uncharacterized protein OS=Solanum tuberosum OX=4113 PE=4 SV=1			M1CUT1
CDF/WT	1.458	0.00198956	2.76	0.028	3	2	PGSC0003DMG400014104	Q2MY52	Q2MY52|PATM2_SOLTU Patatin group M-2 OS=Solanum tuberosum OX=4113 PE=2 SV=1			Q2MY52
CDF/WT	1.387	0.00116363	1.62	0.029	4	1	PGSC0003DMG400008536	M1AG06	M1AG06|M1AG06_SOLTU miraculin-like OS=Solanum tuberosum OX=4113 GN=102596494 PE=4 SV=1			M1AG06
CDF/WT	1.341	0.0022209	3.08	0.027	3	1	PGSC0003DMG400010137	M1AMY3	M1AMY3|M1AMY3_SOLTU cysteine protease inhibitor 1-like OS=Solanum tuberosum OX=4113 GN=102594249 PE=4 SV=1			M1AMY3
CDF/WT	1.323	0.00177271	2.46	0.028	2	2	PGSC0003DMG400029829	M1CX90	M1CX90|M1CX90_SOLTU Eukaryotic translation initiation factor 3 subunit E OS=Solanum tuberosum OX=4113 GN=102606100 PE=3 SV=1			M1CX90
CDF/WT	1.233	0.000523415	0.73	0.048	4	6	PGSC0003DMG400024187	M1C8L3	M1C8L3|M1C8L3_SOLTU 14-3-3 protein 4 OS=Solanum tuberosum OX=4113 GN=102579744 PE=3 SV=1			M1C8L3
CDF/WT	1.215	0.00114969	1.6	0.03	4	2	PGSC0003DMG400016221	P93784	P93784|14335_SOLTU 14-3-3-like protein 16R OS=Solanum tuberosum OX=4113 PE=2 SV=1			P93784
CDF/WT	1.155	0.00102688	1.43	0.034	4	3	PGSC0003DMG400006415	M1A7M4	M1A7M4|M1A7M4_SOLTU 14-3-3 protein 7 OS=Solanum tuberosum OX=4113 GN=102581950 PE=2 SV=1			M1A7M4
CDF/WT	1.084	0.00124182	1.72	0.03	4	2	PGSC0003DMG400017753	M1BI71	M1BI71|M1BI71_SOLTU 14-3-3-like protein OS=Solanum tuberosum OX=4113 PE=3 SV=1			M1BI71
CDF/WT	1.074	0.00260807	3.62	0.029	4	1	PGSC0003DMG400012899	M1AZD2	M1AZD2|M1AZD2_SOLTU 14-3-3 protein OS=Solanum tuberosum OX=4113 GN=102586856 PE=2 SV=1			M1AZD2
CDF/WT	1.002	0.00161016	2.24	0.029	4	2	PGSC0003DMG400031867	P27081	P27081|ADT2_SOLTU ADP,ATP carrier protein, mitochondrial (Fragment) OS=Solanum tuberosum OX=4113 GN=ANT1 PE=2 SV=1			P27081
CDF/WT	1	0.00323723	4.5	0.033	4	1	PGSC0003DMG400027382	M1CM59	M1CM59|M1CM59_SOLTU probable calcium-binding protein CML13 OS=Solanum tuberosum OX=4113 GN=102595378 PE=4 SV=1			M1CM59
CDF/WT	0.963	0.00109826	1.53	0.032	4	4	PGSC0003DMG400019701	M1BQR5	M1BQR5|M1BQR5_SOLTU Uncharacterized protein OS=Solanum tuberosum OX=4113 GN=102602759 PE=4 SV=1			M1BQR5
CDF/WT	0.954	0.00362257	5.03	0.032	4	1	PGSC0003DMG400008749	M1AGX5	M1AGX5|M1AGX5_SOLTU Patatin OS=Solanum tuberosum OX=4113 PE=3 SV=1			M1AGX5
CDF/WT	0.952	0.00347266	4.82	0.033	4	1	PGSC0003DMG400017152	M1BFR4	M1BFR4|M1BFR4_SOLTU acid phosphatase 1-like OS=Solanum tuberosum OX=4113 GN=102602290 PE=4 SV=1			M1BFR4
CDF/WT	0.911	0.0039591	5.5	0.032	4	1	PGSC0003DMG400016231	M1BC31	M1BC31|M1BC31_SOLTU membrane-associated protein VIPP1, chloroplastic OS=Solanum tuberosum OX=4113 GN=102595670 PE=4 SV=1			M1BC31
CDF/WT	0.865	0.00306447	4.26	0.032	4	2	PGSC0003DMG400011721	M1AUH9	M1AUH9|M1AUH9_SOLTU universal stress protein A-like protein OS=Solanum tuberosum OX=4113 GN=102602306 PE=4 SV=1			M1AUH9
CDF/WT	0.861	0.00362956	5.04	0.032	4	2	PGSC0003DMG400029788	M1CX22	M1CX22|M1CX22_SOLTU farnesyl pyrophosphate synthase 1-like OS=Solanum tuberosum OX=4113 GN=102599350 PE=3 SV=1			M1CX22
CDF/WT	0.848	0.00979951	13.61	0.042	2	1	PGSC0003DMG400002804	M0ZSR5	M0ZSR5|M0ZSR5_SOLTU Universal stress protein A-like protein OS=Solanum tuberosum OX=4113 GN=102603140 PE=4 SV=1			M0ZSR5
CDF/WT	0.824	0.00487167	6.77	0.033	4	1	PGSC0003DMG400000127	M0ZGL7	M0ZGL7|M0ZGL7_SOLTU cytochrome b5-like OS=Solanum tuberosum OX=4113 GN=102594935 PE=3 SV=1			M0ZGL7
CDF/WT	0.819	0.00240503	3.34	0.028	4	2	PGSC0003DMG400029087	P48502	P48502|QCR7_SOLTU Cytochrome b-c1 complex subunit 7 OS=Solanum tuberosum OX=4113 PE=1 SV=1			P48502
CDF/WT	0.811	0.00568555	7.9	0.036	4	1	PGSC0003DMG400027143	M1CL70	M1CL70|M1CL70_SOLTU dihydrolipoyl dehydrogenase 1, chloroplastic-like OS=Solanum tuberosum OX=4113 GN=102599296 PE=3 SV=1			M1CL70
CDF/WT	0.805	0.00530541	7.37	0.035	4	1	PGSC0003DMG400025349	M1CDL1	M1CDL1|M1CDL1_SOLTU ATP-dependent Clp protease proteolytic subunit OS=Solanum tuberosum OX=4113 PE=3 SV=1			M1CDL1
CDF/WT	0.793	0.00545699	7.58	0.035	4	1	PGSC0003DMG400009647	M1AKV0	M1AKV0|M1AKV0_SOLTU Uncharacterized protein OS=Solanum tuberosum OX=4113 PE=4 SV=1			M1AKV0
CDF/WT	0.779	0.00170795	2.37	0.028	4	4	PGSC0003DMG400024389	Q2V994	Q2V994|Q2V994_SOLTU V-type proton ATPase subunit G OS=Solanum tuberosum OX=4113 GN=102589825 PE=2 SV=1			Q2V994
CDF/WT	0.767	0.0024675	3.43	0.028	4	3	PGSC0003DMG400023590	Q6R2P7	Q6R2P7|Q6R2P7_SOLTU 14-3-3 protein isoform 20R OS=Solanum tuberosum OX=4113 GN=St14i PE=2 SV=1			Q6R2P7
CDF/WT	0.745	0.00150393	2.09	0.028	4	4	PGSC0003DMG400004999	Q43187	Q43187|IPYR_SOLTU Soluble inorganic pyrophosphatase PPA1 OS=Solanum tuberosum OX=4113 GN=PPA1 PE=1 SV=1			Q43187
CDF/WT	0.743	0.00184464	2.56	0.028	4	3	PGSC0003DMG400012259	M1AWK7	M1AWK7|M1AWK7_SOLTU 26S proteasome non-ATPase regulatory subunit 8 homolog A OS=Solanum tuberosum OX=4113 GN=102603250 PE=4 SV=1			M1AWK7
CDF/WT	0.724	0.00847789	11.78	0.04	3	1	PGSC0003DMG400002634	M0ZRZ7	M0ZRZ7|M0ZRZ7_SOLTU protein CDI-like OS=Solanum tuberosum OX=4113 GN=102599014 PE=4 SV=1			M0ZRZ7
CDF/WT	0.724	0.0014074	1.95	0.028	4	5	PGSC0003DMG400020425	M1BTP6	M1BTP6|M1BTP6_SOLTU 14-3-3 protein OS=Solanum tuberosum OX=4113 GN=102596432 PE=2 SV=1			M1BTP6
CDF/WT	0.721	0.00692832	9.62	0.038	4	1	PGSC0003DMG400018525	M1BL76	M1BL76|M1BL76_SOLTU importin subunit beta-1 OS=Solanum tuberosum OX=4113 GN=102595228 PE=4 SV=1			M1BL76
CDF/WT	0.714	0.00143608	1.99	0.028	4	5	PGSC0003DMG400024638	M1CAI4	M1CAI4|M1CAI4_SOLTU ATP synthase subunit gamma, mitochondrial OS=Solanum tuberosum OX=4113 GN=102577433 PE=3 SV=1			M1CAI4
CDF/WT	0.708	0.00791634	11	0.04	4	1	PGSC0003DMG400012012	M1AVJ2	M1AVJ2|M1AVJ2_SOLTU Fructose-bisphosphate aldolase OS=Solanum tuberosum OX=4113 PE=3 SV=1			M1AVJ2
CDF/WT	0.701	0.00779969	10.83	0.04	4	1	PGSC0003DMG400022297	M1C107	M1C107|M1C107_SOLTU syntaxin-51-like OS=Solanum tuberosum OX=4113 GN=102597197 PE=3 SV=1			M1C107
CDF/WT	0.696	0.00358484	4.98	0.032	4	2	PGSC0003DMG400004583	M0ZZY1	M0ZZY1|M0ZZY1_SOLTU Eukaryotic translation initiation factor 3 subunit H OS=Solanum tuberosum OX=4113 GN=102601497 PE=3 SV=1			M0ZZY1
CDF/WT	0.694	0.00714788	9.93	0.039	4	1	PGSC0003DMG400041977	M1DPR2	M1DPR2|M1DPR2_SOLTU Uncharacterized protein OS=Solanum tuberosum OX=4113 PE=3 SV=1			M1DPR2
CDF/WT	0.689	0.00207606	2.88	0.027	4	5	PGSC0003DMG400006869	M1A9C1	M1A9C1|M1A9C1_SOLTU ATP synthase subunit O, mitochondrial OS=Solanum tuberosum OX=4113 GN=102592995 PE=3 SV=1			M1A9C1
CDF/WT	0.686	0.00244869	3.4	0.028	4	3	PGSC0003DMG400001718	M0ZN89	M0ZN89|M0ZN89_SOLTU 10 kDa chaperonin OS=Solanum tuberosum OX=4113 GN=102586513 PE=4 SV=1			M0ZN89
CDF/WT	0.674	0.00349085	4.85	0.033	4	2	PGSC0003DMG400012210	M1AWB9	M1AWB9|M1AWB9_SOLTU glutamate--cysteine ligase, chloroplastic OS=Solanum tuberosum OX=4113 GN=102600891 PE=4 SV=1			M1AWB9
CDF/WT	0.669	0.00791634	11	0.04	4	1	PGSC0003DMG400005950	M1A5Q3	M1A5Q3|M1A5Q3_SOLTU Cysteine proteinase inhibitor OS=Solanum tuberosum OX=4113 PE=3 SV=1			M1A5Q3
CDF/WT	0.653	0.00413034	5.74	0.032	4	2	PGSC0003DMG400010117	M1AMV7	M1AMV7|M1AMV7_SOLTU Uncharacterized protein OS=Solanum tuberosum OX=4113 PE=4 SV=1			M1AMV7
CDF/WT	0.649	0.0141418	19.64	0.047	3	1	PGSC0003DMG400017933	M1BIS3	M1BIS3|M1BIS3_SOLTU Ribosomal protein L19 OS=Solanum tuberosum OX=4113 GN=102577496 PE=3 SV=1			M1BIS3
CDF/WT	0.648	0.00387747	5.39	0.032	4	2	PGSC0003DMG400001148	M0ZKX1	M0ZKX1|M0ZKX1_SOLTU ruBisCO large subunit-binding protein subunit alpha OS=Solanum tuberosum OX=4113 GN=102594819 PE=3 SV=1			M0ZKX1
CDF/WT	0.647	0.00347266	4.82	0.033	4	3	PGSC0003DMG400028631	M1CSI4	M1CSI4|M1CSI4_SOLTU 40S ribosomal protein S12 OS=Solanum tuberosum OX=4113 GN=102582055 PE=3 SV=1			M1CSI4
CDF/WT	0.645	0.000574016	0.8	0.036	4	17	PGSC0003DMG402028027	M1CPM6	M1CPM6|M1CPM6_SOLTU Uncharacterized protein OS=Solanum tuberosum OX=4113 PE=3 SV=1			M1CPM6
CDF/WT	0.641	0.00204299	2.84	0.028	4	4	PGSC0003DMG400018269	M1BK24	M1BK24|M1BK24_SOLTU glutathione S-transferase zeta class-like OS=Solanum tuberosum OX=4113 GN=102593841 PE=4 SV=1			M1BK24
CDF/WT	0.637	0.00227378	3.16	0.027	4	5	PGSC0003DMG400002387	M0ZQV9	M0ZQV9|M0ZQV9_SOLTU Uncharacterized protein OS=Solanum tuberosum OX=4113 PE=4 SV=1			M0ZQV9
CDF/WT	0.632	0.0029242	4.06	0.031	4	3	PGSC0003DMG400023766	M1C710	M1C710|M1C710_SOLTU importin-4 OS=Solanum tuberosum OX=4113 GN=102606314 PE=4 SV=1			M1C710
CDF/WT	0.628	0.00881778	12.25	0.041	4	1	PGSC0003DMG400008196	M1AEQ1	M1AEQ1|M1AEQ1_SOLTU eukaryotic initiation factor 4A-2-like OS=Solanum tuberosum OX=4113 GN=102597872 PE=3 SV=1			M1AEQ1
CDF/WT	0.626	0.00949953	13.19	0.041	4	1	PGSC0003DMG400009421	M1AJZ7	M1AJZ7|M1AJZ7_SOLTU V-type proton ATPase subunit F OS=Solanum tuberosum OX=4113 GN=102603935 PE=3 SV=1			M1AJZ7
CDF/WT	0.617	0.0075997	10.56	0.04	4	1	PGSC0003DMG400005471	M1A3K0	M1A3K0|M1A3K0_SOLTU Uncharacterized protein OS=Solanum tuberosum OX=4113 PE=4 SV=1			M1A3K0
CDF/WT	0.617	0.0103679	14.4	0.043	4	1	PGSC0003DMG400026281	M1CHJ4	M1CHJ4|M1CHJ4_SOLTU Glutathione peroxidase OS=Solanum tuberosum OX=4113 GN=102591042 PE=3 SV=1			M1CHJ4
CDF/WT	0.616	0.00387747	5.39	0.032	4	3	PGSC0003DMG401011206	M1ASA5	M1ASA5|M1ASA5_SOLTU V-type proton ATPase subunit H OS=Solanum tuberosum OX=4113 GN=102601902 PE=3 SV=1			M1ASA5
CDF/WT	0.609	0.0044185	6.14	0.033	4	2	PGSC0003DMG400009509	M1AKD9	M1AKD9|M1AKD9_SOLTU heat shock protein 83 OS=Solanum tuberosum OX=4113 GN=102603244 PE=3 SV=1			M1AKD9
CDF/WT	0.604	0.00561748	7.8	0.035	4	2	PGSC0003DMG400007966	M1ADQ4	M1ADQ4|M1ADQ4_SOLTU Annexin OS=Solanum tuberosum OX=4113 GN=102594355 PE=3 SV=1			M1ADQ4
CDF/WT	0.6	0.0106661	14.82	0.043	4	1	PGSC0003DMG400011525	M1ATQ1	M1ATQ1|M1ATQ1_SOLTU disease resistance protein RPP13-like OS=Solanum tuberosum OX=4113 GN=107062995 PE=3 SV=1			M1ATQ1
CDF/WT	0.6	0.00933289	12.96	0.041	4	1	PGSC0003DMG400020999	M1BVW6	M1BVW6|M1BVW6_SOLTU Lipoxygenase OS=Solanum tuberosum OX=4113 PE=3 SV=1			M1BVW6
CDF/WT	0.599	0.00984951	13.68	0.042	4	1	PGSC0003DMG400011949	M1AVB3	M1AVB3|M1AVB3_SOLTU Non-specific lipid-transfer protein OS=Solanum tuberosum OX=4113 GN=102598620 PE=3 SV=1			M1AVB3
CDF/WT	0.597	0.0104994	14.58	0.043	4	1	PGSC0003DMG400028589	M1CSB2	M1CSB2|M1CSB2_SOLTU Uncharacterized protein OS=Solanum tuberosum OX=4113 PE=4 SV=1			M1CSB2
CDF/WT	0.592	0.00954952	13.26	0.041	4	1	PGSC0003DMG400005465	M1A3J2	M1A3J2|M1A3J2_SOLTU cytochrome b5 isoform E-like OS=Solanum tuberosum OX=4113 GN=102581306 PE=3 SV=1			M1A3J2
CDF/WT	0.592	0.00367301	5.1	0.031	4	3	PGSC0003DMG400026695	Q307Y7	Q307Y7|Q307Y7_SOLTU GTPase-like OS=Solanum tuberosum OX=4113 GN=102602861 PE=2 SV=1			Q307Y7
CDF/WT	0.591	0.00459513	6.38	0.033	4	2	PGSC0003DMG400024468	M1C9M8	M1C9M8|M1C9M8_SOLTU Uncharacterized protein OS=Solanum tuberosum OX=4113 GN=102605944 PE=4 SV=1			M1C9M8
CDF/WT	0.591	0.00944953	13.13	0.042	4	1	PGSC0003DMG402028569	M1CS73	M1CS73|M1CS73_SOLTU Uncharacterized protein OS=Solanum tuberosum OX=4113 GN=102590374 PE=3 SV=1			M1CS73
CDF/WT	0.589	0.0128658	17.87	0.045	3	1	PGSC0003DMG401029299	M1CUZ8	M1CUZ8|M1CUZ8_SOLTU eukaryotic initiation factor 4A-2-like OS=Solanum tuberosum OX=4113 GN=102594403 PE=3 SV=1			M1CUZ8
CDF/WT	0.587	0.00497488	6.91	0.033	4	3	PGSC0003DMG400004791	M1A0X2	M1A0X2|M1A0X2_SOLTU transaldolase OS=Solanum tuberosum OX=4113 GN=102581220 PE=4 SV=1			M1A0X2
CDF/WT	0.583	0.0121242	16.84	0.044	4	1	PGSC0003DMG400004231	rev_M0ZYK7	M0ZYK7|M0ZYK7_SOLTU reversed zinc finger CCCH domain-containing protein 41-like OS=Solanum tuberosum OX=4113 GN=102602784 PE=4 SV=1			rev_M0ZYK7
CDF/WT	0.577	0.00904719	12.57	0.041	4	8	PGSC0003DMG400004791	M1C547	M1C547|M1C547_SOLTU isopentenyl-diphosphate Delta-isomerase I OS=Solanum tuberosum OX=4113 GN=102595093 PE=4 SV=1			M1C547
CDF/WT	0.573	0.00923766	12.83	0.041	4	1	PGSC0003DMG400036434	M1DCN2	M1DCN2|M1DCN2_SOLTU transcription factor bHLH89-like OS=Solanum tuberosum OX=4113 GN=102596674 PE=4 SV=1			M1DCN2
CDF/WT	0.572	0.00465842	6.47	0.033	4	2	PGSC0003DMG400017331	M1BGH8	M1BGH8|M1BGH8_SOLTU Uncharacterized protein OS=Solanum tuberosum OX=4113 PE=4 SV=1			M1BGH8
CDF/WT	0.57	0.00224703	3.12	0.027	4	5	PGSC0003DMG401020076	M1BS31	M1BS31|M1BS31_SOLTU glycolipid transfer protein 1 OS=Solanum tuberosum OX=4113 GN=102584092 PE=4 SV=1			M1BS31
CDF/WT	0.568	0.0111758	15.52	0.043	4	1	PGSC0003DMG400003898	M0ZX70	M0ZX70|M0ZX70_SOLTU ras-related protein RABC2a-like OS=Solanum tuberosum OX=4113 GN=102583984 PE=4 SV=1			M0ZX70
CDF/WT	0.56	0.0158449	22.01	0.048	3	1	PGSC0003DMG400006918	M1A9H9	M1A9H9|M1A9H9_SOLTU Glucose-6-phosphate 1-epimerase OS=Solanum tuberosum OX=4113 GN=102592943 PE=3 SV=1			M1A9H9
CDF/WT	0.558	0.00507881	7.05	0.034	4	2	PGSC0003DMG400010295	M1ANH9	M1ANH9|M1ANH9_SOLTU TOM1-like protein 2 OS=Solanum tuberosum OX=4113 GN=102598068 PE=4 SV=1			M1ANH9
CDF/WT	0.556	0.00909481	12.63	0.041	4	1	PGSC0003DMG400024095	M1C888	M1C888|M1C888_SOLTU thioredoxin-like protein slr0233 OS=Solanum tuberosum OX=4113 GN=102584454 PE=4 SV=1			M1C888
CDF/WT	0.556	0.0108883	15.12	0.043	4	1	PGSC0003DMG400030019	M1CY08	M1CY08|M1CY08_SOLTU Uncharacterized protein OS=Solanum tuberosum OX=4113 GN=102591178 PE=4 SV=1			M1CY08
CDF/WT	0.555	0.011166	15.51	0.043	4	1	PGSC0003DMG400010156	M1AN07	M1AN07|M1AN07_SOLTU Uncharacterized protein OS=Solanum tuberosum OX=4113 PE=4 SV=1			M1AN07
CDF/WT	0.549	0.0124367	17.27	0.045	4	1	PGSC0003DMG401017153	M1BFR5	M1BFR5|M1BFR5_SOLTU Uncharacterized protein OS=Solanum tuberosum OX=4113 PE=3 SV=1			M1BFR5
CDF/WT	0.548	0.00376463	5.23	0.032	4	4	PGSC0003DMG401017153	M1D1L1	M1D1L1|M1D1L1_SOLTU Uncharacterized protein OS=Solanum tuberosum OX=4113 PE=4 SV=1			M1D1L1
CDF/WT	0.545	0.00312898	4.35	0.032	4	5	PGSC0003DMG400027577	M1CMZ3	M1CMZ3|M1CMZ3_SOLTU Superoxide dismutase OS=Solanum tuberosum OX=4113 GN=102577566 PE=3 SV=1			M1CMZ3
CDF/WT	0.543	0.00340345	4.73	0.033	4	5	PGSC0003DMG400027374	M1CM45	M1CM45|M1CM45_SOLTU ATP synthase subunit d, mitochondrial OS=Solanum tuberosum OX=4113 GN=102603904 PE=3 SV=1			M1CM45
CDF/WT	0.531	0.00166086	2.31	0.028	4	7	PGSC0003DMG400011997	M1AVG8	M1AVG8|M1AVG8_SOLTU ruBisCO large subunit-binding protein subunit alpha, chloroplastic-like OS=Solanum tuberosum OX=4113 GN=102587813 PE=3 SV=1			M1AVG8
CDF/WT	0.527	0.00596856	8.29	0.037	4	2	PGSC0003DMG400005247	M1A2V6	M1A2V6|M1A2V6_SOLTU Uncharacterized protein OS=Solanum tuberosum OX=4113 PE=4 SV=1			M1A2V6
CDF/WT	0.524	0.00603106	8.38	0.037	4	2	PGSC0003DMG400027048	Q2VEG8	Q2VEG8|ACCD_SOLTU Acetyl-coenzyme A carboxylase carboxyl transferase subunit beta, chloroplastic OS=Solanum tuberosum OX=4113 GN=accD PE=2 SV=3			Q2VEG8
CDF/WT	0.522	0.00436354	6.06	0.033	4	3	PGSC0003DMG400007800	M1AD17	M1AD17|M1AD17_SOLTU Uncharacterized protein OS=Solanum tuberosum OX=4113 PE=4 SV=1			M1AD17
CDF/WT	0.518	0.0145373	20.19	0.047	4	1	PGSC0003DMG400008853	M1AHA4	M1AHA4|M1AHA4_SOLTU ras-related protein RABE1a OS=Solanum tuberosum OX=4113 GN=102587980 PE=4 SV=1			M1AHA4
CDF/WT	0.517	0.00726895	10.1	0.039	4	2	PGSC0003DMG400019306	M1BP63	M1BP63|M1BP63_SOLTU Histone H2A OS=Solanum tuberosum OX=4113 GN=102604745 PE=3 SV=1			M1BP63
CDF/WT	0.517	0.00113772	1.58	0.03	4	12	PGSC0003DMG400024011	M1C7V7	M1C7V7|M1C7V7_SOLTU chaperonin-60 beta subunit OS=Solanum tuberosum OX=4113 GN=102577525 PE=3 SV=1			M1C7V7
CDF/WT	0.515	0.00248049	3.45	0.028	4	5	PGSC0003DMG400002537	M0ZRG6	M0ZRG6|M0ZRG6_SOLTU ruBisCO large subunit-binding protein subunit beta, chloroplastic OS=Solanum tuberosum OX=4113 GN=102577751 PE=3 SV=1			M0ZRG6
CDF/WT	0.515	0.0149219	20.73	0.047	4	1	PGSC0003DMG400015241	M1B891	M1B891|M1B891_SOLTU SNF1-related protein kinase regulatory subunit gamma-1 OS=Solanum tuberosum OX=4113 GN=102584848 PE=4 SV=1			M1B891
CDF/WT	0.514	0.0126658	17.59	0.045	4	1	PGSC0003DMG400004276	M0ZYS1	M0ZYS1|M0ZYS1_SOLTU Uncharacterized protein OS=Solanum tuberosum OX=4113 PE=4 SV=1			M0ZYS1
CDF/WT	0.51	0.00612481	8.51	0.037	4	3	PGSC0003DMG400030628	M1D0L6	M1D0L6|M1D0L6_SOLTU cytochrome c oxidase subunit 6a, mitochondrial OS=Solanum tuberosum OX=4113 GN=102583008 PE=3 SV=1			M1D0L6
CDF/WT	0.508	0.0161653	22.45	0.049	4	1	PGSC0003DMG400006564	M1A854	M1A854|M1A854_SOLTU protein RETICULATA-RELATED 3, chloroplastic-like OS=Solanum tuberosum OX=4113 GN=102590049 PE=4 SV=1			M1A854
CDF/WT	0.499	0.0014074	1.95	0.028	4	12	PGSC0003DMG400000704	M0ZJ77	M0ZJ77|M0ZJ77_SOLTU Coatomer subunit gamma OS=Solanum tuberosum OX=4113 GN=102583052 PE=3 SV=1			M0ZJ77
CDF/WT	0.497	0.015832	21.99	0.048	4	1	PGSC0003DMG400031796	M1D4K6	M1D4K6|M1D4K6_SOLTU Ribosomal protein L19 OS=Solanum tuberosum OX=4113 GN=102578588 PE=3 SV=1			M1D4K6
CDF/WT	0.494	0.0131991	18.33	0.046	4	1	PGSC0003DMG400002046	M0ZPK8	M0ZPK8|M0ZPK8_SOLTU Uncharacterized protein OS=Solanum tuberosum OX=4113 PE=3 SV=1			M0ZPK8
CDF/WT	0.491	0.00408502	5.67	0.032	4	3	PGSC0003DMG400029760	Q2VCJ2	Q2VCJ2|Q2VCJ2_SOLTU Ribosomal protein L3-like OS=Solanum tuberosum OX=4113 GN=102598069 PE=2 SV=1			Q2VCJ2
CDF/WT	0.489	0.000852014	1.18	0.033	4	16	PGSC0003DMG400023453	M1C5J7	M1C5J7|M1C5J7_SOLTU T-complex protein 1 subunit gamma OS=Solanum tuberosum OX=4113 GN=102578754 PE=3 SV=1			M1C5J7
CDF/WT	0.485	0.0149988	20.83	0.047	4	1	PGSC0003DMG400020216	M1BSR7	M1BSR7|M1BSR7_SOLTU protein LYK2 OS=Solanum tuberosum OX=4113 GN=102584774 PE=4 SV=1			M1BSR7
CDF/WT	0.482	0.00126315	1.75	0.03	4	11	PGSC0003DMG400029575	M1CW45	M1CW45|M1CW45_SOLTU catechol oxidase B, chloroplastic-like OS=Solanum tuberosum OX=4113 GN=102577727 PE=4 SV=1			M1CW45
CDF/WT	0.481	0.00839094	11.66	0.04	4	3	PGSC0003DMG400021448	Q5CZ53	Q5CZ53|Q5CZ53_SOLTU Pom30 protein OS=Solanum tuberosum OX=4113 GN=pom30 PE=2 SV=1			Q5CZ53
CDF/WT	0.48	0.0103679	14.4	0.043	4	2	PGSC0003DMG400003514	M0ZVI2	M0ZVI2|M0ZVI2_SOLTU soluble inorganic pyrophosphatase 1 OS=Solanum tuberosum OX=4113 GN=102585875 PE=3 SV=1			M0ZVI2
CDF/WT	0.48	0.00518905	7.21	0.034	4	4	PGSC0003DMG400003515	M0ZVI4	M0ZVI4|M0ZVI4_SOLTU gamma carbonic anhydrase 1, mitochondrial-like OS=Solanum tuberosum OX=4113 GN=102586209 PE=4 SV=1			M0ZVI4
CDF/WT	0.473	0.00202103	2.81	0.028	4	8	PGSC0003DMG400001879	M0ZNV9	M0ZNV9|M0ZNV9_SOLTU Annexin OS=Solanum tuberosum OX=4113 GN=102586975 PE=3 SV=1			M0ZNV9
CDF/WT	0.471	0.0146143	20.3	0.047	4	1	PGSC0003DMG400001656	M0ZN04	M0ZN04|M0ZN04_SOLTU Uncharacterized protein OS=Solanum tuberosum OX=4113 GN=102599862 PE=4 SV=1			M0ZN04
CDF/WT	0.468	0.00355549	4.94	0.032	4	6	PGSC0003DMG400013331	M1B144	M1B144|M1B144_SOLTU Glutamate decarboxylase OS=Solanum tuberosum OX=4113 GN=102578660 PE=3 SV=1			M1B144
CDF/WT	0.465	0.00448827	6.23	0.033	4	3	PGSC0003DMG400032824	M1D6A3	M1D6A3|M1D6A3_SOLTU ADP,ATP carrier protein, mitochondrial-like OS=Solanum tuberosum OX=4113 GN=102604516 PE=3 SV=1			M1D6A3
CDF/WT	0.464	0.000855852	1.19	0.032	4	18	PGSC0003DMG400017714	Q9M3H3	Q9M3H3|Q9M3H3_SOLTU Annexin OS=Solanum tuberosum OX=4113 GN=an34 PE=2 SV=1			Q9M3H3
CDF/WT	0.456	0.00923766	12.83	0.041	4	2	PGSC0003DMG400009093	M1AIF8	M1AIF8|M1AIF8_SOLTU mitochondrial outer membrane protein porin 2 OS=Solanum tuberosum OX=4113 GN=102596232 PE=4 SV=1			M1AIF8
CDF/WT	0.456	0.00358484	4.98	0.032	4	5	PGSC0003DMG402027133	M1CL47	M1CL47|M1CL47_SOLTU 7-deoxyloganetic acid glucosyltransferase-like OS=Solanum tuberosum OX=4113 GN=102591695 PE=4 SV=1			M1CL47
CDF/WT	0.455	0.0166653	23.15	0.049	4	1	PGSC0003DMG400006270	M1A6Z4	M1A6Z4|M1A6Z4_SOLTU pyruvate decarboxylase 1 OS=Solanum tuberosum OX=4113 GN=102578941 PE=3 SV=1			M1A6Z4
CDF/WT	0.453	0.0159987	22.22	0.048	4	1	PGSC0003DMG400007230	rev_M1AAY3	M1AAY3|M1AAY3_SOLTU reversed probable 2-oxoglutarate/Fe(II)-dependent dioxygenase OS=Solanum tuberosum OX=4113 GN=102600514 PE=3 SV=1			rev_M1AAY3
CDF/WT	0.451	0.0170894	23.74	0.05	4	1	PGSC0003DMG400009581	M1AKL9	M1AKL9|M1AKL9_SOLTU SKP1-like protein 1B OS=Solanum tuberosum OX=4113 GN=102591070 PE=3 SV=1			M1AKL9
CDF/WT	0.448	0.0110549	15.36	0.043	4	2	PGSC0003DMG400018350	M1BKE7	M1BKE7|M1BKE7_SOLTU Uncharacterized protein OS=Solanum tuberosum OX=4113 PE=4 SV=1			M1BKE7
CDF/WT	0.438	0.0102626	14.25	0.043	4	2	PGSC0003DMG400012387	M1AX28	M1AX28|M1AX28_SOLTU phosphoenolpyruvate carboxylase-like OS=Solanum tuberosum OX=4113 GN=102605963 PE=3 SV=1			M1AX28
CDF/WT	0.433	0.00130136	1.81	0.029	4	15	PGSC0003DMG400002895	M0ZT40	M0ZT40|M0ZT40_SOLTU Sucrose synthase OS=Solanum tuberosum OX=4113 GN=102577594 PE=3 SV=1			M0ZT40
CDF/WT	0.433	0.00147286	2.05	0.028	4	17	PGSC0003DMG400004572	M0ZZV7	M0ZZV7|M0ZZV7_SOLTU Adenosylhomocysteinase OS=Solanum tuberosum OX=4113 GN=102582199 PE=3 SV=1			M0ZZV7
CDF/WT	0.433	0.0142847	19.84	0.047	4	2	PGSC0003DMG400016222	M1BC19	M1BC19|M1BC19_SOLTU RSI1 OS=Solanum tuberosum OX=4113 GN=102588596 PE=2 SV=1			M1BC19
CDF/WT	0.432	0.00359253	4.99	0.032	4	6	PGSC0003DMG401006167	M1A6K1	M1A6K1|M1A6K1_SOLTU Uncharacterized protein OS=Solanum tuberosum OX=4113 PE=4 SV=1			M1A6K1
CDF/WT	0.43	0.0107772	14.97	0.043	4	2	PGSC0003DMG400024915	M1CBS3	M1CBS3|M1CBS3_SOLTU 60S ribosomal protein L3 OS=Solanum tuberosum OX=4113 GN=102590107 PE=3 SV=1			M1CBS3
CDF/WT	0.43	0.0104994	14.58	0.043	4	2	PGSC0003DMG400028238	M1CQK3	M1CQK3|M1CQK3_SOLTU 2-Cys peroxiredoxin BAS1, chloroplastic OS=Solanum tuberosum OX=4113 GN=102583123 PE=4 SV=1			M1CQK3
CDF/WT	0.429	0.0156142	21.69	0.048	4	2	PGSC0003DMG400028418	M1CRG7	M1CRG7|M1CRG7_SOLTU protein transport protein Sec61 subunit alpha-like OS=Solanum tuberosum OX=4113 GN=102596929 PE=3 SV=1			M1CRG7
CDF/WT	0.425	0.0113523	15.77	0.043	4	2	PGSC0003DMG400022851	M1C3C4	M1C3C4|M1C3C4_SOLTU rapid alkalinization factor-like OS=Solanum tuberosum OX=4113 GN=102582329 PE=4 SV=1			M1C3C4
CDF/WT	0.423	0.0047072	6.54	0.033	4	4	PGSC0003DMG400018511	M1BL46	M1BL46|M1BL46_SOLTU probable 6-phosphogluconolactonase 4, chloroplastic OS=Solanum tuberosum OX=4113 GN=102586717 PE=4 SV=1			M1BL46
CDF/WT	0.412	0.0125992	17.5	0.045	4	2	PGSC0003DMG400007205	Q38M72	Q38M72|Q38M72_SOLTU Calmodulin-like OS=Solanum tuberosum OX=4113 GN=102599353 PE=2 SV=1			Q38M72
CDF/WT	0.41	0.0110549	15.36	0.043	4	2	PGSC0003DMG400029787	M1CX21	M1CX21|M1CX21_SOLTU heat shock cognate protein 80-like OS=Solanum tuberosum OX=4113 GN=102600008 PE=3 SV=1			M1CX21
CDF/WT	0.405	0.00612883	8.51	0.037	4	4	PGSC0003DMG400023524	M1C5Y4	M1C5Y4|M1C5Y4_SOLTU UDP-glucuronic acid decarboxylase 6-like OS=Solanum tuberosum OX=4113 GN=102606064 PE=4 SV=1			M1C5Y4
CDF/WT	0.404	0.0144275	20.04	0.047	4	2	PGSC0003DMG400004052	M0ZXX7	M0ZXX7|M0ZXX7_SOLTU serine/threonine-protein phosphatase 2A 65 kDa regulatory subunit A beta isoform-like OS=Solanum tuberosum OX=4113 GN=102597239 PE=4 SV=1			M0ZXX7
CDF/WT	0.401	0.00199998	2.78	0.028	4	12	PGSC0003DMG400028982	M1CTV7	M1CTV7|M1CTV7_SOLTU Citrate synthase OS=Solanum tuberosum OX=4113 GN=102595372 PE=3 SV=1			M1CTV7
CDF/WT	0.399	0.0144604	20.09	0.047	4	2	PGSC0003DMG400020152	M1BSG7	M1BSG7|M1BSG7_SOLTU putative G3BP-like protein OS=Solanum tuberosum OX=4113 GN=102580874 PE=4 SV=1			M1BSG7
CDF/WT	0.398	0.00474988	6.6	0.033	4	6	PGSC0003DMG400009672	M1AKX9	M1AKX9|M1AKX9_SOLTU Uncharacterized protein OS=Solanum tuberosum OX=4113 PE=4 SV=1			M1AKX9
CDF/WT	0.396	0.0075597	10.5	0.04	4	3	PGSC0003DMG400021603	M1BY87	M1BY87|M1BY87_SOLTU Uncharacterized protein OS=Solanum tuberosum OX=4113 PE=4 SV=1			M1BY87
CDF/WT	0.395	0.00345448	4.8	0.033	4	8	PGSC0003DMG400028342	M1CR31	M1CR31|M1CR31_SOLTU 26S proteasome non-ATPase regulatory subunit 11 homolog OS=Solanum tuberosum OX=4113 GN=102584171 PE=4 SV=1			M1CR31
CDF/WT	0.394	0.00725899	10.08	0.039	4	3	PGSC0003DMG400016101	M1BBH3	M1BBH3|M1BBH3_SOLTU Uncharacterized protein OS=Solanum tuberosum OX=4113 PE=4 SV=1			M1BBH3
CDF/WT	0.393	0.00872688	12.12	0.041	4	3	PGSC0003DMG400014867	M1B703	M1B703|M1B703_SOLTU Peroxidase OS=Solanum tuberosum OX=4113 PE=3 SV=1			M1B703
CDF/WT	0.392	0.00699974	9.72	0.039	4	4	PGSC0003DMG400024582	M1CA90	M1CA90|M1CA90_SOLTU betaine aldehyde dehydrogenase, chloroplastic-like OS=Solanum tuberosum OX=4113 PE=3 SV=1			M1CA90
CDF/WT	0.378	0.00446501	6.2	0.033	4	6	PGSC0003DMG400009029	M1AI54	M1AI54|M1AI54_SOLTU Ran GTPase-activating protein 2 OS=Solanum tuberosum OX=4113 GN=102577808 PE=4 SV=1			M1AI54
CDF/WT	0.378	0.00979951	13.61	0.042	4	3	PGSC0003DMG400024627	M1CAG8	M1CAG8|M1CAG8_SOLTU alpha-1,4-glucan-protein synthase [UDP-forming] 2-like OS=Solanum tuberosum OX=4113 GN=102584052 PE=4 SV=1			M1CAG8
CDF/WT	0.377	0.0125617	17.45	0.045	4	2	PGSC0003DMG400009938	B5M4B1	B5M4B1|B5M4B1_SOLTU Tubulin beta chain OS=Solanum tuberosum OX=4113 GN=102577624 PE=2 SV=1			B5M4B1
CDF/WT	0.377	0.0134658	18.7	0.046	4	2	PGSC0003DMG400033685	P13868	P13868|CALM1_SOLTU Calmodulin-1 OS=Solanum tuberosum OX=4113 GN=PCM1 PE=1 SV=2			P13868
CDF/WT	0.374	0.00834746	11.59	0.041	4	4	PGSC0003DMG400021527	M1BXX6	M1BXX6|M1BXX6_SOLTU Uncharacterized protein OS=Solanum tuberosum OX=4113 PE=3 SV=1			M1BXX6
CDF/WT	0.37	0.00542842	7.54	0.035	4	5	PGSC0003DMG400003615	K7WNV9	K7WNV9|K7WNV9_SOLTU Thioredoxin OS=Solanum tuberosum OX=4113 GN=102599106 PE=2 SV=1			K7WNV9
CDF/WT	0.37	0.0011506	1.6	0.03	4	25	PGSC0003DMG400016589	M1BDK7	M1BDK7|M1BDK7_SOLTU 4-alpha-glucanotransferase OS=Solanum tuberosum OX=4113 PE=3 SV=1			M1BDK7
CDF/WT	0.368	0.0127991	17.78	0.045	4	2	PGSC0003DMG400020422	M1BTN7	M1BTN7|M1BTN7_SOLTU phosphoenolpyruvate carboxylasen OS=Solanum tuberosum OX=4113 PE=3 SV=1			M1BTN7
CDF/WT	0.364	0.00625786	8.69	0.037	4	4	PGSC0003DMG400022159	M1C075	M1C075|M1C075_SOLTU heat shock cognate protein 80-like OS=Solanum tuberosum OX=4113 PE=3 SV=1			M1C075
CDF/WT	0.357	0.00536096	7.45	0.035	4	5	PGSC0003DMG400013596	P25083	P25083|ADT1_SOLTU ADP,ATP carrier protein, mitochondrial OS=Solanum tuberosum OX=4113 GN=ANT PE=2 SV=1			P25083
CDF/WT	0.356	0.00413034	5.74	0.033	4	7	PGSC0003DMG400010333	M1ANN8	M1ANN8|M1ANN8_SOLTU glutathionyl-hydroquinone reductase YqjG OS=Solanum tuberosum OX=4113 GN=102599013 PE=4 SV=1			M1ANN8
CDF/WT	0.353	0.00682118	9.47	0.038	4	5	PGSC0003DMG400016387	M1BCP7	M1BCP7|M1BCP7_SOLTU 2-Cys peroxiredoxin BAS1, chloroplastic OS=Solanum tuberosum OX=4113 GN=102583732 PE=4 SV=1			M1BCP7
CDF/WT	0.352	0.0109994	15.28	0.043	4	3	PGSC0003DMG400020224	M1BST6	M1BST6|M1BST6_SOLTU cytochrome c1-2, heme protein, mitochondrial-like OS=Solanum tuberosum OX=4113 GN=102598087 PE=4 SV=1			M1BST6
CDF/WT	0.35	0.00821703	11.41	0.04	4	4	PGSC0003DMG400012675	M1AYG3	M1AYG3|M1AYG3_SOLTU T-complex protein 1 subunit zeta 1-like OS=Solanum tuberosum OX=4113 GN=102606166 PE=3 SV=1			M1AYG3
CDF/WT	0.346	0.00263885	3.67	0.029	4	15	PGSC0003DMG400026124	M1CGV3	M1CGV3|M1CGV3_SOLTU T-complex protein 1 subunit eta OS=Solanum tuberosum OX=4113 GN=102599617 PE=3 SV=1			M1CGV3
CDF/WT	0.341	0.0106105	14.74	0.043	4	5	PGSC0003DMG400007073	M1AA90	M1AA90|M1AA90_SOLTU epidermis-specific secreted glycoprotein EP1-like OS=Solanum tuberosum OX=4113 GN=102580397 PE=4 SV=1			M1AA90
CDF/WT	0.341	0.0141418	19.64	0.047	4	2	PGSC0003DMG400029847	M1CXB9	M1CXB9|M1CXB9_SOLTU 7,8-dihydroneopterin aldolase OS=Solanum tuberosum OX=4113 GN=102604418 PE=3 SV=1			M1CXB9
CDF/WT	0.339	0.00812466	11.29	0.041	4	5	PGSC0003DMG400013514	M1B1W6	M1B1W6|M1B1W6_SOLTU ADP-ribosylation factor 2 OS=Solanum tuberosum OX=4113 GN=102586978 PE=3 SV=1			M1B1W6
CDF/WT	0.335	0.00606231	8.42	0.037	4	6	PGSC0003DMG400024913	M1CBR7	M1CBR7|M1CBR7_SOLTU Uncharacterized protein OS=Solanum tuberosum OX=4113 GN=102588907 PE=3 SV=1			M1CBR7
CDF/WT	0.335	0.00679287	9.44	0.038	4	6	PGSC0003DMG400030577	M1D0D3	M1D0D3|M1D0D3_SOLTU 3-isopropylmalate dehydrogenase OS=Solanum tuberosum OX=4113 GN=102586564 PE=3 SV=1			M1D0D3
CDF/WT	0.334	0.0164153	22.8	0.049	4	2	PGSC0003DMG400002759	M0ZSI1	M0ZSI1|M0ZSI1_SOLTU Importin subunit alpha OS=Solanum tuberosum OX=4113 GN=102577776 PE=3 SV=1			M0ZSI1
CDF/WT	0.334	0.0134276	18.65	0.046	4	4	PGSC0003DMG400022953	M1C3S5	M1C3S5|M1C3S5_SOLTU Uncharacterized protein OS=Solanum tuberosum OX=4113 PE=3 SV=1			M1C3S5
CDF/WT	0.333	0.00426657	5.93	0.032	4	10	PGSC0003DMG400014627	M1B647	M1B647|M1B647_SOLTU glutathione S-transferase OS=Solanum tuberosum OX=4113 GN=102583107 PE=3 SV=1			M1B647
CDF/WT	0.329	0.00536096	7.45	0.035	4	7	PGSC0003DMG400030056	M1CY45	M1CY45|M1CY45_SOLTU L-ascorbate peroxidase 1, cytosolic OS=Solanum tuberosum OX=4113 GN=102586145 PE=3 SV=1			M1CY45
CDF/WT	0.328	0.00886323	12.31	0.041	4	4	PGSC0003DMG400016040	M1BBC0	M1BBC0|M1BBC0_SOLTU ubiquinone biosynthesis protein COQ9-B, mitochondrial OS=Solanum tuberosum OX=4113 GN=102586706 PE=4 SV=1			M1BBC0
CDF/WT	0.321	0.0110549	15.36	0.043	4	3	PGSC0003DMG400012337	M1AWY0	M1AWY0|M1AWY0_SOLTU probable aquaporin PIP-type pTOM75 OS=Solanum tuberosum OX=4113 GN=102595835 PE=3 SV=1			M1AWY0
CDF/WT	0.313	0.00886323	12.31	0.041	4	4	PGSC0003DMG400011436	M1ATD0	M1ATD0|M1ATD0_SOLTU enoyl-[acyl-carrier-protein] reductase [NADH], chloroplastic-like OS=Solanum tuberosum OX=4113 GN=102593496 PE=4 SV=1			M1ATD0
CDF/WT	0.306	0.00703678	9.77	0.038	4	8	PGSC0003DMG400011436	M1B4C0	M1B4C0|M1B4C0_SOLTU pyrophosphate-energized vacuolar membrane proton pump-like OS=Solanum tuberosum OX=4113 GN=102583477 PE=3 SV=1			M1B4C0
CDF/WT	0.302	0.00223253	3.1	0.027	4	17	PGSC0003DMG400010007	P21342	P21342|PFPA_SOLTU Pyrophosphate--fructose 6-phosphate 1-phosphotransferase subunit alpha OS=Solanum tuberosum OX=4113 GN=PFP-ALPHA PE=1 SV=2			P21342
CDF/WT	0.3	0.00570571	7.93	0.036	4	8	PGSC0003DMG400011293	M1ASR2	M1ASR2|M1ASR2_SOLTU plasma membrane-associated cation-binding protein 1 OS=Solanum tuberosum OX=4113 GN=102600937 PE=4 SV=1			M1ASR2
CDF/WT	0.299	0.0114699	15.93	0.043	4	4	PGSC0003DMG400030682	M1D0T5	M1D0T5|M1D0T5_SOLTU pyrophosphate-energized vacuolar membrane proton pump-like OS=Solanum tuberosum OX=4113 GN=102579479 PE=3 SV=1			M1D0T5
CDF/WT	0.294	0.00612481	8.51	0.037	4	6	PGSC0003DMG400004977	M1A1R9	M1A1R9|M1A1R9_SOLTU glutathione S-transferase T1-like OS=Solanum tuberosum OX=4113 GN=102599650 PE=4 SV=1			M1A1R9
CDF/WT	0.293	0.00361104	5.02	0.032	4	10	PGSC0003DMG400010146	O24383	O24383|CPI10_SOLTU Cysteine protease inhibitor 10 (Fragment) OS=Solanum tuberosum OX=4113 PE=2 SV=1			O24383
CDF/WT	0.291	0.00422213	5.86	0.032	4	13	PGSC0003DMG400015862	M1BAR8	M1BAR8|M1BAR8_SOLTU importin-5-like OS=Solanum tuberosum OX=4113 GN=102592059 PE=4 SV=1			M1BAR8
CDF/WT	0.29	0.0102626	14.25	0.043	4	5	PGSC0003DMG400005758	M1A4U8	M1A4U8|M1A4U8_SOLTU Uncharacterized protein OS=Solanum tuberosum OX=4113 PE=4 SV=1			M1A4U8
CDF/WT	0.29	0.0112346	15.6	0.043	4	5	PGSC0003DMG400024926	M1CBT8	M1CBT8|M1CBT8_SOLTU ATP phosphoribosyltransferase 2, chloroplastic OS=Solanum tuberosum OX=4113 GN=102596899 PE=4 SV=1			M1CBT8
CDF/WT	0.288	0.0134276	18.65	0.046	4	4	PGSC0003DMG400028115	M1CPX8	M1CPX8|M1CPX8_SOLTU GrpE protein homolog OS=Solanum tuberosum OX=4113 GN=102605233 PE=3 SV=1			M1CPX8
CDF/WT	0.286	0.00816633	11.34	0.041	4	6	PGSC0003DMG401004281	M0ZYT1	M0ZYT1|M0ZYT1_SOLTU importin-5-like OS=Solanum tuberosum OX=4113 GN=102592059 PE=4 SV=1			M0ZYT1
CDF/WT	0.279	0.00203189	2.82	0.028	4	21	PGSC0003DMG400028127	M1CQ02	M1CQ02|M1CQ02_SOLTU Uncharacterized protein OS=Solanum tuberosum OX=4113 PE=3 SV=1			M1CQ02
CDF/WT	0.279	0.00881778	12.25	0.041	4	7	PGSC0003DMG400006896	P42055	P42055|VDAC1_SOLTU Mitochondrial outer membrane protein porin of 34 kDa OS=Solanum tuberosum OX=4113 PE=1 SV=2			P42055
CDF/WT	0.276	0.00959952	13.33	0.042	4	7	PGSC0003DMG400015187	M1B815	M1B815|M1B815_SOLTU adenylate kinase 4 OS=Solanum tuberosum OX=4113 GN=102587831 PE=3 SV=1			M1B815
CDF/WT	0.274	0.00678547	9.43	0.038	4	7	PGSC0003DMG400027735	M1CNI7	M1CNI7|M1CNI7_SOLTU UDP-glucuronic acid decarboxylase 6-like OS=Solanum tuberosum OX=4113 GN=102589759 PE=4 SV=1			M1CNI7
CDF/WT	0.271	0.0136419	18.95	0.046	4	5	PGSC0003DMG400000720	Q38JI9	Q38JI9|Q38JI9_SOLTU Uncharacterized protein OS=Solanum tuberosum OX=4113 GN=102577689 PE=2 SV=1			Q38JI9
CDF/WT	0.269	0.00959952	13.33	0.041	4	6	PGSC0003DMG400026026	M1CGF6	M1CGF6|M1CGF6_SOLTU T-complex protein 1 subunit alpha OS=Solanum tuberosum OX=4113 GN=102584935 PE=3 SV=1			M1CGF6
CDF/WT	0.254	0.00852137	11.84	0.041	4	7	PGSC0003DMG400001932	M0ZP38	M0ZP38|M0ZP38_SOLTU 6-phosphogluconate dehydrogenase, decarboxylating OS=Solanum tuberosum OX=4113 GN=102597505 PE=3 SV=1			M0ZP38
CDF/WT	0.254	0.00214442	2.98	0.027	4	23	PGSC0003DMG402009395	M1AJV5	M1AJV5|M1AJV5_SOLTU 26S proteasome non-ATPase regulatory subunit 2 homolog OS=Solanum tuberosum OX=4113 GN=102586490 PE=3 SV=1			M1AJV5
CDF/WT	0.253	0.00323723	4.5	0.033	4	16	PGSC0003DMG400002779	M0ZSL7	M0ZSL7|M0ZSL7_SOLTU Uncharacterized protein OS=Solanum tuberosum OX=4113 PE=3 SV=1			M0ZSL7
CDF/WT	0.253	0.00451152	6.27	0.033	4	16	PGSC0003DMG400012391	M1AX34	M1AX34|M1AX34_SOLTU Uncharacterized protein OS=Solanum tuberosum OX=4113 PE=4 SV=1			M1AX34
CDF/WT	0.252	0.00404158	5.61	0.032	4	15	PGSC0003DMG400028177	M1CQ92	M1CQ92|M1CQ92_SOLTU Pyruvate kinase OS=Solanum tuberosum OX=4113 PE=3 SV=1			M1CQ92
CDF/WT	0.251	0.0121867	16.93	0.044	4	5	PGSC0003DMG400012344	M1AWZ7	M1AWZ7|M1AWZ7_SOLTU Glutathione peroxidase OS=Solanum tuberosum OX=4113 PE=3 SV=1			M1AWZ7
CDF/WT	0.25	0.0141418	19.64	0.047	4	5	PGSC0003DMG400022359	M1C1B5	M1C1B5|M1C1B5_SOLTU Eukaryotic translation initiation factor 3 subunit J OS=Solanum tuberosum OX=4113 GN=102592326 PE=3 SV=1			M1C1B5
CDF/WT	0.249	0.00477488	6.63	0.033	4	13	PGSC0003DMG400014989	M1B7C9	M1B7C9|M1B7C9_SOLTU Importin subunit alpha OS=Solanum tuberosum OX=4113 GN=102578456 PE=3 SV=1			M1B7C9
CDF/WT	0.243	0.0104731	14.55	0.043	4	7	PGSC0003DMG400025646	M1CER3	M1CER3|M1CER3_SOLTU patellin-3 OS=Solanum tuberosum OX=4113 GN=102580007 PE=4 SV=1			M1CER3
CDF/WT	0.242	0.0111758	15.52	0.043	4	7	PGSC0003DMG400010146	M1AMZ0	M1AMZ0|M1AMZ0_SOLTU Uncharacterized protein OS=Solanum tuberosum OX=4113 PE=4 SV=1			M1AMZ0
CDF/WT	0.241	0.00816633	11.34	0.041	4	11	PGSC0003DMG400030476	M1CZU6	M1CZU6|M1CZU6_SOLTU 26S protease regulatory subunit 6B homolog OS=Solanum tuberosum OX=4113 GN=102579765 PE=3 SV=1			M1CZU6
CDF/WT	0.238	0.00738433	10.26	0.039	4	8	PGSC0003DMG400008708	M1AGR8	M1AGR8|M1AGR8_SOLTU Uncharacterized protein OS=Solanum tuberosum OX=4113 PE=3 SV=1			M1AGR8
CDF/WT	0.235	0.0156654	21.76	0.048	4	5	PGSC0003DMG400025527	M1CEC3	M1CEC3|M1CEC3_SOLTU Uncharacterized protein OS=Solanum tuberosum OX=4113 PE=4 SV=1			M1CEC3
CDF/WT	0.234	0.00863597	12	0.041	4	8	PGSC0003DMG400016168	M1BBU4	M1BBU4|M1BBU4_SOLTU Methylenetetrahydrofolate reductase OS=Solanum tuberosum OX=4113 GN=102598073 PE=3 SV=1			M1BBU4
CDF/WT	0.232	0.011117	15.44	0.043	4	6	PGSC0003DMG400010000	M1AMB5	M1AMB5|M1AMB5_SOLTU cinnamoyl-CoA reductase 2 OS=Solanum tuberosum OX=4113 GN=102577831 PE=4 SV=1			M1AMB5
CDF/WT	0.229	0.00619335	8.6	0.037	4	14	PGSC0003DMG400030565	M1D0A6	M1D0A6|M1D0A6_SOLTU Fructose-bisphosphate aldolase OS=Solanum tuberosum OX=4113 PE=3 SV=1			M1D0A6
CDF/WT	0.227	0.00909481	12.63	0.041	4	9	PGSC0003DMG400015731	M1BA84	M1BA84|M1BA84_SOLTU Uncharacterized protein OS=Solanum tuberosum OX=4113 PE=4 SV=1			M1BA84
CDF/WT	0.226	0.0117052	16.26	0.043	4	8	PGSC0003DMG400015761	M1BAD2	M1BAD2|M1BAD2_SOLTU 26S proteasome non-ATPase regulatory subunit 1 homolog OS=Solanum tuberosum OX=4113 GN=102585142 PE=3 SV=1			M1BAD2
CDF/WT	0.226	0.0047072	6.54	0.033	4	17	PGSC0003DMG400000496	Q07511	Q07511|FDH_SOLTU Formate dehydrogenase, mitochondrial OS=Solanum tuberosum OX=4113 GN=FDH1 PE=1 SV=2			Q07511
CDF/WT	0.223	0.00909481	12.63	0.041	4	14	PGSC0003DMG400029309	M1CV13	M1CV13|M1CV13_SOLTU Pyrophosphate--fructose 6-phosphate 1-phosphotransferase subunit alpha OS=Solanum tuberosum OX=4113 GN=PFP-ALPHA PE=3 SV=1			M1CV13
CDF/WT	0.222	0.0105258	14.62	0.043	4	9	PGSC0003DMG400031000	M1D253	M1D253|M1D253_SOLTU Uncharacterized protein OS=Solanum tuberosum OX=4113 PE=4 SV=1			M1D253
CDF/WT	0.217	0.00353697	4.91	0.032	4	22	PGSC0003DMG400033874	M1D7J7	M1D7J7|M1D7J7_SOLTU Malic enzyme OS=Solanum tuberosum OX=4113 GN=102580952 PE=3 SV=1			M1D7J7
CDF/WT	0.192	0.0136419	18.95	0.046	4	7	PGSC0003DMG400009775	M1ALA6	M1ALA6|M1ALA6_SOLTU elongation factor 1-delta 1-like OS=Solanum tuberosum OX=4113 GN=102593337 PE=3 SV=1			M1ALA6
CDF/WT	0.191	0.0114699	15.93	0.043	4	11	PGSC0003DMG400006193	Q38HT8	Q38HT8|Q38HT8_SOLTU Proteasome subunit alpha type OS=Solanum tuberosum OX=4113 GN=102596046 PE=2 SV=1			Q38HT8
CDF/WT	0.188	0.0111758	15.52	0.043	4	14	PGSC0003DMG401024510	M1C9X0	M1C9X0|M1C9X0_SOLTU enolase 1, chloroplastic OS=Solanum tuberosum OX=4113 GN=102602244 PE=3 SV=1			M1C9X0
CDF/WT	0.18	0.00558807	7.76	0.036	4	22	PGSC0003DMG400007019	M1A9Z4	M1A9Z4|M1A9Z4_SOLTU transketolase, chloroplastic-like OS=Solanum tuberosum OX=4113 GN=102588555 PE=4 SV=1			M1A9Z4
CDF/WT	0.179	0.0136419	18.95	0.046	4	12	PGSC0003DMG400000444	M0ZI18	M0ZI18|M0ZI18_SOLTU heat shock cognate 70 kDa protein OS=Solanum tuberosum OX=4113 GN=102594883 PE=3 SV=1			M0ZI18
CDF/WT	0.172	0.0143561	19.94	0.047	4	9	PGSC0003DMG401005658	M1A470	M1A470|M1A470_SOLTU guanine nucleotide-binding protein subunit beta-like protein OS=Solanum tuberosum OX=4113 GN=102579003 PE=4 SV=1			M1A470
CDF/WT	0.17	0.00757663	10.52	0.04	4	25	PGSC0003DMG400001328	Q43847	Q43847|SSY2_SOLTU Granule-bound starch synthase 2, chloroplastic/amyloplastic OS=Solanum tuberosum OX=4113 GN=SS2 PE=1 SV=3			Q43847
CDF/WT	0.167	0.00949953	13.19	0.042	4	15	PGSC0003DMG400005273	M1A2Y4	M1A2Y4|M1A2Y4_SOLTU Peroxidase OS=Solanum tuberosum OX=4113 GN=102590030 PE=3 SV=1			M1A2Y4
CDF/WT	0.164	0.010555	14.66	0.043	4	16	PGSC0003DMG400006829	M1A967	M1A967|M1A967_SOLTU T-complex protein 1 subunit theta OS=Solanum tuberosum OX=4113 GN=102597293 PE=3 SV=1			M1A967
CDF/WT	0.128	0.00551413	7.66	0.035	4	42	PGSC0003DMG400012111	Q00775	Q00775|SSG1_SOLTU Granule-bound starch synthase 1, chloroplastic/amyloplastic OS=Solanum tuberosum OX=4113 GN=WAXY PE=1 SV=1			Q00775
CDF/WT	-0.121	0.00877233	12.18	0.041	4	35	PGSC0003DMG400031765	P32811	P32811|PHSH_SOLTU Alpha-glucan phosphorylase, H isozyme OS=Solanum tuberosum OX=4113 PE=1 SV=1			P32811
CDF/WT	-0.122	0.0157487	21.87	0.048	4	21	PGSC0003DMG400018283	M1BK48	M1BK48|M1BK48_SOLTU Uncharacterized protein OS=Solanum tuberosum OX=4113 PE=3 SV=1			M1BK48
CDF/WT	-0.139	0.00799967	11.11	0.04	4	26	PGSC0003DMG400020269	P37830	P37830|G6PD_SOLTU Glucose-6-phosphate 1-dehydrogenase, cytoplasmic isoform OS=Solanum tuberosum OX=4113 GN=G6PDH PE=2 SV=1			P37830
CDF/WT	-0.14	0.013499	18.75	0.046	4	15	PGSC0003DMG400022388	Q3HVL7	Q3HVL7|Q3HVL7_SOLTU TSJT1-like protein OS=Solanum tuberosum OX=4113 GN=102596316 PE=2 SV=1			Q3HVL7
CDF/WT	-0.143	0.0158449	22.01	0.048	4	15	PGSC0003DMG404006439	M1A7Q3	M1A7Q3|M1A7Q3_SOLTU perakine reductase-like OS=Solanum tuberosum OX=4113 GN=102596401 PE=4 SV=1			M1A7Q3
CDF/WT	-0.159	0.013999	19.44	0.047	4	14	PGSC0003DMG400011909	M1AV66	M1AV66|M1AV66_SOLTU metacaspase-4-like OS=Solanum tuberosum OX=4113 GN=102582386 PE=4 SV=1			M1AV66
CDF/WT	-0.17	0.0120617	16.75	0.044	4	15	PGSC0003DMG401001731	M0ZNB0	M0ZNB0|M0ZNB0_SOLTU L-ascorbate peroxidase, cytosolic OS=Solanum tuberosum OX=4113 GN=102578720 PE=3 SV=1			M0ZNB0
CDF/WT	-0.172	0.014499	20.14	0.047	4	15	PGSC0003DMG400008824	M1AH59	M1AH59|M1AH59_SOLTU Uncharacterized protein OS=Solanum tuberosum OX=4113 GN=102598108 PE=4 SV=1			M1AH59
CDF/WT	-0.185	0.0120617	16.75	0.045	4	12	PGSC0003DMG400028624	M1CSH0	M1CSH0|M1CSH0_SOLTU 26.5 kDa heat shock protein, mitochondrial OS=Solanum tuberosum OX=4113 GN=102578969 PE=3 SV=1			M1CSH0
CDF/WT	-0.189	0.014845	20.62	0.047	4	8	PGSC0003DMG400014388	M1B547	M1B547|M1B547_SOLTU reactive Intermediate Deaminase A, chloroplastic-like OS=Solanum tuberosum OX=4113 GN=102592473 PE=4 SV=1			M1B547
CDF/WT	-0.19	0.0116464	16.18	0.043	4	10	PGSC0003DMG400020542	M1BU58	M1BU58|M1BU58_SOLTU ERBB-3 BINDING PROTEIN 1-like OS=Solanum tuberosum OX=4113 GN=102599893 PE=4 SV=1			M1BU58
CDF/WT	-0.191	0.0127325	17.69	0.045	4	9	PGSC0003DMG400020542	M1C015	M1C015|M1C015_SOLTU porphobilinogen deaminase, chloroplastic OS=Solanum tuberosum OX=4113 GN=102580720 PE=3 SV=1			M1C015
CDF/WT	-0.203	0.00603106	8.38	0.037	4	14	PGSC0003DMG400012395	M1AX44	M1AX44|M1AX44_SOLTU Malate dehydrogenase OS=Solanum tuberosum OX=4113 PE=3 SV=1			M1AX44
CDF/WT	-0.204	0.0143561	19.94	0.047	4	10	PGSC0003DMG400012408	M1AX69	M1AX69|M1AX69_SOLTU probable protein phosphatase 2C 39 OS=Solanum tuberosum OX=4113 GN=102593800 PE=4 SV=1			M1AX69
CDF/WT	-0.212	0.00590607	8.2	0.037	4	17	PGSC0003DMG400030613	M1D0I5	M1D0I5|M1D0I5_SOLTU probable cytosolic oligopeptidase A OS=Solanum tuberosum OX=4113 GN=102591157 PE=3 SV=1			M1D0I5
CDF/WT	-0.213	0.0154603	21.47	0.048	4	8	PGSC0003DMG400002601	M0ZRU4	M0ZRU4|M0ZRU4_SOLTU IAA-amino acid hydrolase ILR1-like 4 OS=Solanum tuberosum OX=4113 GN=102599664 PE=4 SV=1			M0ZRU4
CDF/WT	-0.216	0.016332	22.69	0.049	4	5	PGSC0003DMG400030426	M1CZL5	M1CZL5|M1CZL5_SOLTU 17.8 kDa class I heat shock protein OS=Solanum tuberosum OX=4113 GN=102605425 PE=3 SV=1			M1CZL5
CDF/WT	-0.222	0.00775969	10.78	0.04	4	13	PGSC0003DMG400025199	M1CD27	M1CD27|M1CD27_SOLTU Methylthioribose-1-phosphate isomerase OS=Solanum tuberosum OX=4113 GN=102596204 PE=3 SV=1			M1CD27
CDF/WT	-0.226	0.00771969	10.72	0.04	4	10	PGSC0003DMG400009231	M1AJ32	M1AJ32|M1AJ32_SOLTU Eukaryotic translation initiation factor 3 subunit I OS=Solanum tuberosum OX=4113 GN=102592807 PE=3 SV=1			M1AJ32
CDF/WT	-0.227	0.0143561	19.94	0.047	4	5	PGSC0003DMG401005881	M1A5C6	M1A5C6|M1A5C6_SOLTU Ribosomal protein OS=Solanum tuberosum OX=4113 GN=102599549 PE=3 SV=1			M1A5C6
CDF/WT	-0.227	0.00989951	13.75	0.042	4	9	PGSC0003DMG400030365	M1CZC0	M1CZC0|EBP1_SOLTU ERBB-3 BINDING PROTEIN 1 OS=Solanum tuberosum OX=4113 GN=EBP1 PE=2 SV=1			M1CZC0
CDF/WT	-0.228	0.00839094	11.66	0.04	4	11	PGSC0003DMG400020107	M1BS90	M1BS90|M1BS90_SOLTU Peptidylprolyl isomerase OS=Solanum tuberosum OX=4113 GN=102590789 PE=4 SV=1			M1BS90
CDF/WT	-0.231	0.00682118	9.47	0.038	4	12	PGSC0003DMG400028641	O24381	O24381|TLC1_SOLTU Plastidic ATP/ADP-transporter OS=Solanum tuberosum OX=4113 PE=2 SV=2			O24381
CDF/WT	-0.232	0.0156654	21.76	0.048	4	5	PGSC0003DMG400008356	M1AFA9	M1AFA9|M1AFA9_SOLTU Glutamate dehydrogenase OS=Solanum tuberosum OX=4113 GN=102585678 PE=3 SV=1			M1AFA9
CDF/WT	-0.233	0.0116464	16.18	0.043	4	8	PGSC0003DMG401000859	M0ZJT7	M0ZJT7|M0ZJT7_SOLTU carboxypeptidase Y OS=Solanum tuberosum OX=4113 GN=102604152 PE=4 SV=1			M0ZJT7
CDF/WT	-0.243	0.00662046	9.2	0.039	4	12	PGSC0003DMG401012699	M1AYK4	M1AYK4|M1AYK4_SOLTU S-formylglutathione hydrolase OS=Solanum tuberosum OX=4113 GN=102593609 PE=3 SV=1			M1AYK4
CDF/WT	-0.246	0.0107772	14.97	0.043	4	7	PGSC0003DMG402025083	M1CCJ9	M1CCJ9|M1CCJ9_SOLTU Peroxidase OS=Solanum tuberosum OX=4113 GN=102585990 PE=3 SV=1			M1CCJ9
CDF/WT	-0.246	0.0145704	20.24	0.047	4	4	PGSC0003DMG400025299	M1CDE0	M1CDE0|M1CDE0_SOLTU Alpha-galactosidase OS=Solanum tuberosum OX=4113 GN=102601663 PE=3 SV=1			M1CDE0
CDF/WT	-0.248	0.0127325	17.69	0.045	4	5	PGSC0003DMG400026076	M1CGN0	M1CGN0|M1CGN0_SOLTU Uncharacterized protein OS=Solanum tuberosum OX=4113 PE=4 SV=1			M1CGN0
CDF/WT	-0.249	0.0151527	21.05	0.047	4	3	PGSC0003DMG400021189	M1BWL4	M1BWL4|M1BWL4_SOLTU 40S ribosomal protein S25-2 OS=Solanum tuberosum OX=4113 GN=102600827 PE=4 SV=1			M1BWL4
CDF/WT	-0.25	0.0159987	22.22	0.048	4	4	PGSC0003DMG400007429	M1ABS2	M1ABS2|M1ABS2_SOLTU 60S ribosomal protein L38-like OS=Solanum tuberosum OX=4113 GN=102598237 PE=3 SV=1			M1ABS2
CDF/WT	-0.253	0.00791634	11	0.041	4	7	PGSC0003DMG400004436	M0ZZE2	M0ZZE2|M0ZZE2_SOLTU triosephosphate isomerase, chloroplastic-like OS=Solanum tuberosum OX=4113 GN=102601486 PE=3 SV=1			M0ZZE2
CDF/WT	-0.253	0.0142847	19.84	0.047	4	5	PGSC0003DMG400019698	M1BQQ9	M1BQQ9|M1BQQ9_SOLTU systemin receptor SR160 OS=Solanum tuberosum OX=4113 GN=102606232 PE=3 SV=1			M1BQQ9
CDF/WT	-0.259	0.0145373	20.19	0.047	4	5	PGSC0003DMG400002765	M0ZSJ5	M0ZSJ5|M0ZSJ5_SOLTU nucleolar protein 56-like OS=Solanum tuberosum OX=4113 GN=102580709 PE=4 SV=1			M0ZSJ5
CDF/WT	-0.261	0.0107216	14.89	0.043	4	5	PGSC0003DMG401001978	M0ZPB6	M0ZPB6|M0ZPB6_SOLTU Uricase OS=Solanum tuberosum OX=4113 PE=3 SV=1			M0ZPB6
CDF/WT	-0.261	0.0125617	17.45	0.045	4	5	PGSC0003DMG400010304	M1ANJ7	M1ANJ7|M1ANJ7_SOLTU sulfite reductase 1 [ferredoxin], chloroplastic OS=Solanum tuberosum OX=4113 GN=102601168 PE=4 SV=1			M1ANJ7
CDF/WT	-0.264	0.00821703	11.41	0.04	4	8	PGSC0003DMG400020488	M1BTZ0	M1BTZ0|M1BTZ0_SOLTU plasminogen activator inhibitor 1 RNA-binding protein-like OS=Solanum tuberosum OX=4113 GN=102590612 PE=4 SV=1			M1BTZ0
CDF/WT	-0.266	0.0121867	16.93	0.044	4	6	PGSC0003DMG400031224	M1D357	M1D357|M1D357_SOLTU vacuolar-sorting receptor 1-like OS=Solanum tuberosum OX=4113 GN=102594404 PE=4 SV=1			M1D357
CDF/WT	-0.27	0.0102626	14.25	0.043	4	6	PGSC0003DMG400003048	M0ZTP0	M0ZTP0|M0ZTP0_SOLTU plant UBX domain-containing protein 8 OS=Solanum tuberosum OX=4113 GN=102579677 PE=4 SV=1			M0ZTP0
CDF/WT	-0.275	0.00994684	13.82	0.042	4	7	PGSC0003DMG401031759	M1D4F7	M1D4F7|M1D4F7_SOLTU phospholipase A1-IIgamma-like OS=Solanum tuberosum OX=4113 GN=102586126 PE=4 SV=1			M1D4F7
CDF/WT	-0.278	0.016082	22.34	0.048	4	3	PGSC0003DMG401011647	M1AU78	M1AU78|M1AU78_SOLTU Uncharacterized protein OS=Solanum tuberosum OX=4113 PE=3 SV=1			M1AU78
CDF/WT	-0.278	0.00668942	9.29	0.039	4	9	PGSC0003DMG400018104	M1BJD2	M1BJD2|M1BJD2_SOLTU cell division cycle protein 48 homolog OS=Solanum tuberosum OX=4113 GN=102600114 PE=4 SV=1			M1BJD2
CDF/WT	-0.278	0.008083	11.23	0.041	4	6	PGSC0003DMG400026236	M1CHC6	M1CHC6|M1CHC6_SOLTU palmitoyl-protein thioesterase 1-like OS=Solanum tuberosum OX=4113 GN=102602882 PE=4 SV=1			M1CHC6
CDF/WT	-0.28	0.0153834	21.37	0.048	4	3	PGSC0003DMG401021334	M1BX50	M1BX50|M1BX50_SOLTU Uncharacterized protein OS=Solanum tuberosum OX=4113 PE=4 SV=1			M1BX50
CDF/WT	-0.282	0.0149988	20.83	0.047	4	4	PGSC0003DMG400002597	M0ZRT6	M0ZRT6|M0ZRT6_SOLTU 60S ribosomal protein L28-1-like OS=Solanum tuberosum OX=4113 GN=102577710 PE=4 SV=1			M0ZRT6
CDF/WT	-0.285	0.014845	20.62	0.047	4	4	PGSC0003DMG400018557	M1BLC8	M1BLC8|M1BLC8_SOLTU Profilin OS=Solanum tuberosum OX=4113 GN=102582238 PE=3 SV=1			M1BLC8
CDF/WT	-0.288	0.00461894	6.42	0.033	4	11	PGSC0003DMG400022088	M1BZW7	M1BZW7|M1BZW7_SOLTU Uncharacterized protein OS=Solanum tuberosum OX=4113 PE=4 SV=1			M1BZW7
CDF/WT	-0.291	0.00679287	9.44	0.038	4	7	PGSC0003DMG400000417	M0ZHX5	M0ZHX5|M0ZHX5_SOLTU Superoxide dismutase [Cu-Zn] OS=Solanum tuberosum OX=4113 GN=102605869 PE=3 SV=1			M0ZHX5
CDF/WT	-0.292	0.0120617	16.75	0.044	4	4	PGSC0003DMG401010423	M1AP15	M1AP15|M1AP15_SOLTU Glycine cleavage system H protein OS=Solanum tuberosum OX=4113 GN=102590851 PE=3 SV=1			M1AP15
CDF/WT	-0.292	0.0146143	20.3	0.047	4	3	PGSC0003DMG400024876	M1CBK0	M1CBK0|M1CBK0_SOLTU cytochrome c OS=Solanum tuberosum OX=4113 GN=102582196 PE=3 SV=1			M1CBK0
CDF/WT	-0.293	0.015832	21.99	0.048	4	3	PGSC0003DMG400030017	M1CY07	M1CY07|M1CY07_SOLTU Uncharacterized protein OS=Solanum tuberosum OX=4113 PE=4 SV=1			M1CY07
CDF/WT	-0.301	0.00662046	9.2	0.038	4	6	PGSC0003DMG400000408	M0ZHV2	M0ZHV2|M0ZHV2_SOLTU Xyloglucan endotransglucosylase/hydrolase OS=Solanum tuberosum OX=4113 GN=102599489 PE=3 SV=1			M0ZHV2
CDF/WT	-0.303	0.00839094	11.66	0.041	4	4	PGSC0003DMG400022607	P52903	P52903|ODPA_SOLTU Pyruvate dehydrogenase E1 component subunit alpha, mitochondrial OS=Solanum tuberosum OX=4113 PE=1 SV=1			P52903
CDF/WT	-0.304	0.0148561	20.64	0.047	4	3	PGSC0003DMG400031345	M1D3L2	M1D3L2|M1D3L2_SOLTU 40S ribosomal protein S18-like OS=Solanum tuberosum OX=4113 GN=102587187 PE=3 SV=1			M1D3L2
CDF/WT	-0.314	0.00399992	5.56	0.032	4	11	PGSC0003DMG400011753	M1AUM4	M1AUM4|M1AUM4_SOLTU Uncharacterized protein OS=Solanum tuberosum OX=4113 PE=4 SV=1			M1AUM4
CDF/WT	-0.327	0.00195874	2.72	0.028	4	13	PGSC0003DMG400010147	M1AMZ1	M1AMZ1|M1AMZ1_SOLTU Uncharacterized protein OS=Solanum tuberosum OX=4113 PE=4 SV=1			M1AMZ1
CDF/WT	-0.331	0.00923766	12.83	0.041	4	4	PGSC0003DMG400022707	M1C2Q1	M1C2Q1|M1C2Q1_SOLTU protein argonaute 4 OS=Solanum tuberosum OX=4113 GN=102604021 PE=4 SV=1			M1C2Q1
CDF/WT	-0.339	0.0155373	21.58	0.048	4	3	PGSC0003DMG400009891	M1ALQ2	M1ALQ2|M1ALQ2_SOLTU Alpha-amylase OS=Solanum tuberosum OX=4113 GN=102577485 PE=3 SV=1			M1ALQ2
CDF/WT	-0.343	0.00218388	3.03	0.027	4	12	PGSC0003DMG400012003	M1AVI1	M1AVI1|M1AVI1_SOLTU cell division cycle protein 48 homolog OS=Solanum tuberosum OX=4113 GN=102589113 PE=4 SV=1			M1AVI1
CDF/WT	-0.345	0.00256753	3.57	0.029	4	14	PGSC0003DMG400019677	M1BQM9	M1BQM9|M1BQM9_SOLTU Elongation factor 1-alpha OS=Solanum tuberosum OX=4113 GN=102598326 PE=3 SV=1			M1BQM9
CDF/WT	-0.349	0.0106836	14.84	0.043	4	3	PGSC0003DMG400007830	P56333	P56333|IF5A1_SOLTU Eukaryotic translation initiation factor 5A-1/2 OS=Solanum tuberosum OX=4113 GN=EIF5A1 PE=2 SV=1			P56333
CDF/WT	-0.35	0.00593731	8.25	0.037	4	4	PGSC0003DMG400020772	Q2XTC2	Q2XTC2|Q2XTC2_SOLTU Elongation factor 1-alpha OS=Solanum tuberosum OX=4113 GN=102600107 PE=2 SV=1			Q2XTC2
CDF/WT	-0.354	0.0101047	14.04	0.043	4	3	PGSC0003DMG400028112	M1CPX2	M1CPX2|M1CPX2_SOLTU Uncharacterized protein OS=Solanum tuberosum OX=4113 PE=4 SV=1			M1CPX2
CDF/WT	-0.354	0.00121018	1.68	0.03	4	19	PGSC0003DMG400029408	M1CVH4	M1CVH4|M1CVH4_SOLTU Catalase OS=Solanum tuberosum OX=4113 PE=3 SV=1			M1CVH4
CDF/WT	-0.358	0.00499987	6.94	0.033	4	7	PGSC0003DMG400001442	M0ZM32	M0ZM32|M0ZM32_SOLTU chaperone protein ClpB3, chloroplastic OS=Solanum tuberosum OX=4113 GN=102592268 PE=3 SV=1			M0ZM32
CDF/WT	-0.365	0.0138562	19.25	0.047	4	2	PGSC0003DMG400004124	M0ZY89	M0ZY89|M0ZY89_SOLTU 40S ribosomal protein S16 OS=Solanum tuberosum OX=4113 GN=102588385 PE=3 SV=1			M0ZY89
CDF/WT	-0.369	0.00757663	10.52	0.04	4	5	PGSC0003DMG400030868	Q3HRY7	Q3HRY7|Q3HRY7_SOLTU 60S ribosomal protein L13 OS=Solanum tuberosum OX=4113 GN=RPL13 PE=2 SV=1			Q3HRY7
CDF/WT	-0.382	0.00492295	6.84	0.033	4	5	PGSC0003DMG400008994	M1AHZ8	M1AHZ8|M1AHZ8_SOLTU peroxiredoxin-2F, mitochondrial OS=Solanum tuberosum OX=4113 GN=102583739 PE=4 SV=1			M1AHZ8
CDF/WT	-0.382	0.00489731	6.8	0.033	4	6	PGSC0003DMG400030812	P21357	P21357|AROF_SOLTU Phospho-2-dehydro-3-deoxyheptonate aldolase 1, chloroplastic OS=Solanum tuberosum OX=4113 GN=SHKA PE=1 SV=2			P21357
CDF/WT	-0.385	0.00372542	5.17	0.032	4	7	PGSC0003DMG400011264	M1ASK9	M1ASK9|M1ASK9_SOLTU Uncharacterized protein OS=Solanum tuberosum OX=4113 PE=4 SV=1			M1ASK9
CDF/WT	-0.388	0.00231323	3.21	0.027	4	9	PGSC0003DMG400023519	M1C5X7	M1C5X7|M1C5X7_SOLTU 2-oxoglutarate dehydrogenase, mitochondrial OS=Solanum tuberosum OX=4113 GN=102603826 PE=4 SV=1			M1C5X7
CDF/WT	-0.408	0.0112935	15.69	0.043	4	2	PGSC0003DMG400025645	M1CER2	M1CER2|M1CER2_SOLTU Uncharacterized protein OS=Solanum tuberosum OX=4113 GN=102579678 PE=4 SV=1			M1CER2
CDF/WT	-0.423	0.00374502	5.2	0.032	4	6	PGSC0003DMG400004838	M1A136	M1A136|M1A136_SOLTU 60S ribosomal protein L28-1-like OS=Solanum tuberosum OX=4113 GN=102583234 PE=4 SV=1			M1A136
CDF/WT	-0.424	0.00616109	8.56	0.037	4	4	PGSC0003DMG400004547	J7EQ13	J7EQ13|J7EQ13_SOLTU Proteinase inhibitor 2 OS=Solanum tuberosum OX=4113 GN=PIN-II PE=2 SV=1			J7EQ13
CDF/WT	-0.426	0.0124367	17.27	0.045	3	3	PGSC0003DMG400008502	M1AFW4	M1AFW4|M1AFW4_SOLTU Clathrin light chain OS=Solanum tuberosum OX=4113 GN=102585812 PE=3 SV=1			M1AFW4
CDF/WT	-0.431	0.0106105	14.74	0.043	4	2	PGSC0003DMG400000541	M0ZII5	M0ZII5|M0ZII5_SOLTU Uncharacterized protein OS=Solanum tuberosum OX=4113 GN=102601715 PE=4 SV=1			M0ZII5
CDF/WT	-0.434	0.0103152	14.33	0.043	4	2	PGSC0003DMG400032084	M1D4Y4	M1D4Y4|M1D4Y4_SOLTU Uncharacterized protein OS=Solanum tuberosum OX=4113 GN=102603851 PE=4 SV=1			M1D4Y4
CDF/WT	-0.44	0.00479988	6.67	0.033	4	4	PGSC0003DMG400020148	M1BSG3	M1BSG3|M1BSG3_SOLTU 60S ribosomal protein L14-1 OS=Solanum tuberosum OX=4113 GN=102584420 PE=4 SV=1			M1BSG3
CDF/WT	-0.455	0.00703678	9.77	0.038	4	3	PGSC0003DMG400018180	M1BJP4	M1BJP4|M1BJP4_SOLTU 60S ribosomal protein L27a-3-like OS=Solanum tuberosum OX=4113 GN=102606393 PE=3 SV=1			M1BJP4
CDF/WT	-0.46	0.0024675	3.43	0.028	4	6	PGSC0003DMG400005642	M1A449	M1A449|M1A449_SOLTU 40S ribosomal protein S7 OS=Solanum tuberosum OX=4113 GN=102589285 PE=3 SV=1			M1A449
CDF/WT	-0.463	0.00839094	11.66	0.041	4	2	PGSC0003DMG400020566	M1BU94	M1BU94|M1BU94_SOLTU 40S ribosomal protein S26 OS=Solanum tuberosum OX=4113 GN=102580154 PE=3 SV=1			M1BU94
CDF/WT	-0.464	0.0142847	19.84	0.047	4	2	PGSC0003DMG400027916	M1CP96	M1CP96|M1CP96_SOLTU inositol-3-phosphate synthase OS=Solanum tuberosum OX=4113 GN=102598817 PE=4 SV=1			M1CP96
CDF/WT	-0.464	0.0109994	15.28	0.043	4	2	PGSC0003DMG400027916	M1D721	M1D721|M1D721_SOLTU probable 2-oxoglutarate/Fe(II)-dependent dioxygenase OS=Solanum tuberosum OX=4113 GN=102596780 PE=3 SV=1			M1D721
CDF/WT	-0.469	0.0159987	22.22	0.049	4	1	PGSC0003DMG400007321	M1ABA8	M1ABA8|M1ABA8_SOLTU Uncharacterized protein OS=Solanum tuberosum OX=4113 GN=102592533 PE=4 SV=1			M1ABA8
CDF/WT	-0.475	0.00211109	2.93	0.027	4	8	PGSC0003DMG400009968	M1AM40	M1AM40|M1AM40_SOLTU ERD10C OS=Solanum tuberosum OX=4113 GN=102589834 PE=2 SV=1			M1AM40
CDF/WT	-0.475	0.00474988	6.6	0.033	4	3	PGSC0003DMG400025212	M1CD37	M1CD37|M1CD37_SOLTU 60S ribosomal protein L9-1 OS=Solanum tuberosum OX=4113 GN=102585829 PE=4 SV=1			M1CD37
CDF/WT	-0.477	0.0139276	19.35	0.047	4	1	PGSC0003DMG400005042	M1A220	M1A220|M1A220_SOLTU universal stress protein A-like protein OS=Solanum tuberosum OX=4113 GN=102583035 PE=4 SV=1			M1A220
CDF/WT	-0.478	0.00163558	2.27	0.029	4	12	PGSC0003DMG400026909	M1CK13	M1CK13|M1CK13_SOLTU Lysine--tRNA ligase OS=Solanum tuberosum OX=4113 GN=102596211 PE=3 SV=1			M1CK13
CDF/WT	-0.479	0.00422213	5.86	0.033	4	3	PGSC0003DMG400030594	Q2VEH0	Q2VEH0|ATPB_SOLTU ATP synthase subunit beta, chloroplastic OS=Solanum tuberosum OX=4113 GN=atpB PE=3 SV=1			Q2VEH0
CDF/WT	-0.487	0.0149219	20.73	0.047	4	1	PGSC0003DMG400000295	rev_M0ZHB7	M0ZHB7|M0ZHB7_SOLTU reversed Phosphotransferase OS=Solanum tuberosum OX=4113 GN=102605773 PE=3 SV=1			rev_M0ZHB7
CDF/WT	-0.488	0.00584831	8.12	0.036	4	4	PGSC0003DMG400019392	M1BPI3	M1BPI3|M1BPI3_SOLTU ABC transporter F family member 4-like OS=Solanum tuberosum OX=4113 GN=102603555 PE=4 SV=1			M1BPI3
CDF/WT	-0.491	0.0075997	10.56	0.04	4	2	PGSC0003DMG400007336	Q2V999	Q2V999|Q2V999_SOLTU 40S ribosomal protein S15-like OS=Solanum tuberosum OX=4113 GN=102590282 PE=2 SV=1			Q2V999
CDF/WT	-0.493	0.00742279	10.31	0.04	4	2	PGSC0003DMG402005570	M1A3V1	M1A3V1|M1A3V1_SOLTU ubiquitin fusion degradation protein 1 homolog OS=Solanum tuberosum OX=4113 GN=102601939 PE=4 SV=1			M1A3V1
CDF/WT	-0.496	0.00703678	9.77	0.039	4	2	PGSC0003DMG400026987	Q3HVL2	Q3HVL2|Q3HVL2_SOLTU Ribosomal protein L27a-like protein OS=Solanum tuberosum OX=4113 GN=102586268 PE=2 SV=1			Q3HVL2
CDF/WT	-0.497	0.0149988	20.83	0.047	4	1	PGSC0003DMG400017893	rev_M1BIN2	M1BIN2|M1BIN2_SOLTU reversed alpha-soluble NSF attachment protein OS=Solanum tuberosum OX=4113 GN=102602621 PE=4 SV=1			rev_M1BIN2
CDF/WT	-0.504	0.00834746	11.59	0.041	4	2	PGSC0003DMG400000286	M0ZQX8	M0ZQX8|M0ZQX8_SOLTU 40S ribosomal protein S30 OS=Solanum tuberosum OX=4113 GN=102582763 PE=3 SV=1			M0ZQX8
CDF/WT	-0.504	0.0137133	19.05	0.046	4	1	PGSC0003DMG400023400	Q38HT9	Q38HT9|Q38HT9_SOLTU DnaJ-like protein OS=Solanum tuberosum OX=4113 GN=102577512 PE=2 SV=1			Q38HT9
CDF/WT	-0.506	0.00111764	1.55	0.032	4	12	PGSC0003DMG401031045	M1D2B9	M1D2B9|M1D2B9_SOLTU protein argonaute 1-like OS=Solanum tuberosum OX=4113 GN=102582607 PE=3 SV=1			M1D2B9
CDF/WT	-0.511	0.00219538	3.05	0.027	4	6	PGSC0003DMG400014855	Q2VCJ5	Q2VCJ5|Q2VCJ5_SOLTU 40S ribosomal protein S6 OS=Solanum tuberosum OX=4113 GN=102600285 PE=2 SV=1			Q2VCJ5
CDF/WT	-0.518	0.00561748	7.8	0.036	4	2	PGSC0003DMG400030052	M1CY42	M1CY42|M1CY42_SOLTU 40S ribosomal protein S16-like OS=Solanum tuberosum OX=4113 GN=102601557 PE=3 SV=1			M1CY42
CDF/WT	-0.519	0.00172726	2.4	0.028	4	8	PGSC0003DMG400026963	M1CK99	M1CK99|M1CK99_SOLTU protein argonaute 1-like OS=Solanum tuberosum OX=4113 GN=102595869 PE=3 SV=1			M1CK99
CDF/WT	-0.528	0.0107216	14.89	0.043	4	1	PGSC0003DMG400026899	M1CJZ9	M1CJZ9|M1CJZ9_SOLTU Cysteine proteinase inhibitor OS=Solanum tuberosum OX=4113 PE=3 SV=1			M1CJZ9
CDF/WT	-0.53	0.00339649	4.72	0.033	4	4	PGSC0003DMG400030998	M1D249	M1D249|M1D249_SOLTU 2-methylene-furan-3-one reductase OS=Solanum tuberosum OX=4113 GN=102604604 PE=4 SV=1			M1D249
CDF/WT	-0.533	0.0140704	19.54	0.047	4	1	PGSC0003DMG400016066	M1BBE4	M1BBE4|M1BBE4_SOLTU Uncharacterized protein OS=Solanum tuberosum OX=4113 PE=4 SV=1			M1BBE4
CDF/WT	-0.534	0.0128658	17.87	0.045	4	1	PGSC0003DMG400001759	Q38HT5	Q38HT5|Q38HT5_SOLTU 40S ribosomal protein S23 OS=Solanum tuberosum OX=4113 GN=102582696 PE=2 SV=1			Q38HT5
CDF/WT	-0.539	0.0142133	19.74	0.047	4	1	PGSC0003DMG400025114	M1CCP1	M1CCP1|M1CCP1_SOLTU F-box/FBD/LRR-repeat protein At1g13570-like OS=Solanum tuberosum OX=4113 GN=102596430 PE=4 SV=1			M1CCP1
CDF/WT	-0.542	0.0121867	16.93	0.044	4	1	PGSC0003DMG400017393	rev_M1BGQ4	M1BGQ4|M1BGQ4_SOLTU reversed Uncharacterized protein OS=Solanum tuberosum OX=4113 PE=4 SV=1			rev_M1BGQ4
CDF/WT	-0.546	0.0129325	17.96	0.045	4	1	PGSC0003DMG400011315	M1AST3	M1AST3|M1AST3_SOLTU eukaryotic translation initiation factor 2 subunit gamma-like OS=Solanum tuberosum OX=4113 GN=102585342 PE=4 SV=1			M1AST3
CDF/WT	-0.546	0.00444176	6.17	0.033	4	3	PGSC0003DMG400012101	M1AVU1	M1AVU1|M1AVU1_SOLTU 60S ribosomal protein L35a-2 OS=Solanum tuberosum OX=4113 GN=102586281 PE=3 SV=1			M1AVU1
CDF/WT	-0.548	0.0114111	15.85	0.043	4	1	PGSC0003DMG400010136	M1AMY2	M1AMY2|M1AMY2_SOLTU cysteine protease inhibitor 9-like OS=Solanum tuberosum OX=4113 GN=102593917 PE=4 SV=1			M1AMY2
CDF/WT	-0.548	0.00312898	4.35	0.032	4	4	PGSC0003DMG402028588	M1CSB1	M1CSB1|M1CSB1_SOLTU serine--tRNA ligase OS=Solanum tuberosum OX=4113 GN=102580921 PE=4 SV=1			M1CSB1
CDF/WT	-0.552	0.00422213	5.86	0.032	4	3	PGSC0003DMG400024093	Q9ZRB5	Q9ZRB5|Q9ZRB5_SOLTU Ci21B protein OS=Solanum tuberosum OX=4113 GN=ci21B PE=4 SV=1			Q9ZRB5
CDF/WT	-0.559	0.0132658	18.43	0.046	4	1	PGSC0003DMG400029266	M1CUT3	M1CUT3|M1CUT3_SOLTU Uncharacterized protein OS=Solanum tuberosum OX=4113 PE=4 SV=1			M1CUT3
CDF/WT	-0.563	0.0101047	14.04	0.043	4	1	PGSC0003DMG400009906	M1ALT0	M1ALT0|M1ALT0_SOLTU Catalase OS=Solanum tuberosum OX=4113 GN=102598238 PE=3 SV=1			M1ALT0
CDF/WT	-0.569	0.00323328	4.49	0.033	4	4	PGSC0003DMG400033056	M1D6I1	M1D6I1|M1D6I1_SOLTU Uncharacterized protein OS=Solanum tuberosum OX=4113 PE=4 SV=1			M1D6I1
CDF/WT	-0.571	0.0121867	16.93	0.044	4	1	PGSC0003DMG400037581	rev_M1DF22	M1DF22|M1DF22_SOLTU reversed Uncharacterized protein OS=Solanum tuberosum OX=4113 PE=4 SV=1			rev_M1DF22
CDF/WT	-0.583	0.00185435	2.58	0.027	4	3	PGSC0003DMG400023375	M1C576	M1C576|M1C576_SOLTU Histone H2B OS=Solanum tuberosum OX=4113 GN=102602475 PE=3 SV=1			M1C576
CDF/WT	-0.584	0.00133802	1.86	0.029	4	9	PGSC0003DMG400010119	M1AMW1	M1AMW1|M1AMW1_SOLTU mediator of RNA polymerase II transcription subunit 36a-like OS=Solanum tuberosum OX=4113 GN=102584645 PE=3 SV=1			M1AMW1
CDF/WT	-0.599	0.00210987	2.93	0.027	4	7	PGSC0003DMG400006662	M1A8I6	M1A8I6|M1A8I6_SOLTU Uncharacterized protein OS=Solanum tuberosum OX=4113 PE=4 SV=1			M1A8I6
CDF/WT	-0.604	0.00436354	6.06	0.033	4	2	PGSC0003DMG400001714	M0ZN84	M0ZN84|M0ZN84_SOLTU dynamin-related protein 1E OS=Solanum tuberosum OX=4113 GN=102584195 PE=3 SV=1			M0ZN84
CDF/WT	-0.605	0.013999	19.44	0.047	3	1	PGSC0003DMG400003769	M1BEC3	M1BEC3|M1BEC3_SOLTU Histone H3 OS=Solanum tuberosum OX=4113 GN=102584902 PE=3 SV=1			M1BEC3
CDF/WT	-0.616	0.0113523	15.77	0.043	4	1	PGSC0003DMG400006622	M1A8D1	M1A8D1|M1A8D1_SOLTU Phosphoinositide phospholipase C OS=Solanum tuberosum OX=4113 PE=4 SV=1			M1A8D1
CDF/WT	-0.618	0.00944953	13.13	0.042	4	1	PGSC0003DMG400029747	M1CWV8	M1CWV8|M1CWV8_SOLTU Uncharacterized protein OS=Solanum tuberosum OX=4113 GN=102593487 PE=4 SV=1			M1CWV8
CDF/WT	-0.627	0.00909481	12.63	0.041	4	1	PGSC0003DMG400010291	M1ANH5	M1ANH5|M1ANH5_SOLTU probable 60S ribosomal protein L14 OS=Solanum tuberosum OX=4113 GN=102593585 PE=4 SV=1			M1ANH5
CDF/WT	-0.634	0.00868142	12.06	0.041	4	1	PGSC0003DMG401020908	M1BVL3	M1BVL3|M1BVL3_SOLTU Uncharacterized protein OS=Solanum tuberosum OX=4113 PE=3 SV=1			M1BVL3
CDF/WT	-0.641	0.00820799	11.4	0.041	4	1	PGSC0003DMG400005534	rev_M1A3R4	|M1A3R4_SOLTU reversed Uncharacterized protein OS=Solanum tuberosum OX=4113 PE=4 SV=1			rev_M1A3R4
CDF/WT	-0.643	0.00335082	4.65	0.033	4	3	PGSC0003DMG400020325	M1BT92	M1BT92|M1BT92_SOLTU acetyl-coenzyme A carboxylase carboxyl transferase subunit alpha, chloroplastic OS=Solanum tuberosum OX=4113 GN=102583167 PE=3 SV=1			M1BT92
CDF/WT	-0.646	0.00668942	9.29	0.038	4	2	PGSC0003DMG400017517	M1BH70	M1BH70|M1BH70_SOLTU Uncharacterized protein OS=Solanum tuberosum OX=4113 GN=102598964 PE=4 SV=1			M1BH70
CDF/WT	-0.651	0.00703678	9.77	0.038	4	1	PGSC0003DMG400017387	M1BGP8	M1BGP8|M1BGP8_SOLTU Uncharacterized protein OS=Solanum tuberosum OX=4113 PE=4 SV=1			M1BGP8
CDF/WT	-0.653	0.00371147	5.16	0.032	4	2	PGSC0003DMG400015130	P20346	P20346|DF322_SOLTU Defensin-like protein P322 OS=Solanum tuberosum OX=4113 PE=2 SV=1			P20346
CDF/WT	-0.658	0.00816633	11.34	0.041	4	1	PGSC0003DMG400024872	rev_M1CBJ4	M1CBJ4|M1CBJ4_SOLTU reversed Uncharacterized protein OS=Solanum tuberosum OX=4113 GN=102579219 PE=4 SV=1			rev_M1CBJ4
CDF/WT	-0.659	0.00166665	2.31	0.028	4	6	PGSC0003DMG400027002	M1CKG8	M1CKG8|M1CKG8_SOLTU protein argonaute 4 OS=Solanum tuberosum OX=4113 GN=102589875 PE=4 SV=1			M1CKG8
CDF/WT	-0.663	0.0014074	1.95	0.029	4	8	PGSC0003DMG400029195	M1CUL2	M1CUL2|M1CUL2_SOLTU Ferritin OS=Solanum tuberosum OX=4113 GN=102577652 PE=3 SV=1			M1CUL2
CDF/WT	-0.673	0.00349085	4.85	0.033	4	2	PGSC0003DMG400018433	M1BKR7	M1BKR7|M1BKR7_SOLTU Uncharacterized protein OS=Solanum tuberosum OX=4113 GN=102578673 PE=3 SV=1			M1BKR7
CDF/WT	-0.678	0.0131991	18.33	0.046	2	1	PGSC0003DMG400030339	K7VKA6	K7VKA6|K7VKA6_SOLTU 17.6 kDa class 1 small heat shock protein OS=Solanum tuberosum OX=4113 GN=Sl20.1shsp PE=2 SV=1			K7VKA6
CDF/WT	-0.683	0.0123742	17.19	0.045	2	1	PGSC0003DMG400035720	M1DB34	M1DB34|M1DB34_SOLTU Uncharacterized protein OS=Solanum tuberosum OX=4113 PE=4 SV=1			M1DB34
CDF/WT	-0.686	0.000704794	0.98	0.034	4	9	PGSC0003DMG400007335	P80595	P80595|APY_SOLTU Apyrase OS=Solanum tuberosum OX=4113 GN=RROP1 PE=1 SV=2			P80595
CDF/WT	-0.692	0.00678547	9.43	0.039	4	1	PGSC0003DMG400004686	O04829	O04829|O04829_SOLTU Ubiquitin extension protein-like protein OS=Solanum tuberosum OX=4113 GN=102593024 PE=2 SV=1			O04829
CDF/WT	-0.697	0.00699974	9.72	0.039	4	1	PGSC0003DMG402019255	M1BNZ1	M1BNZ1|M1BNZ1_SOLTU Pectinesterase OS=Solanum tuberosum OX=4113 PE=3 SV=1			M1BNZ1
CDF/WT	-0.722	0.00596856	8.29	0.037	4	1	PGSC0003DMG400007129	M1AAH6	M1AAH6|M1AAH6_SOLTU protein argonaute 5-like OS=Solanum tuberosum OX=4113 GN=102594657 PE=3 SV=1			M1AAH6
CDF/WT	-0.757	0.00533319	7.41	0.035	4	1	PGSC0003DMG400019215	M1BNS7	M1BNS7|M1BNS7_SOLTU 60S ribosomal protein L23a-like OS=Solanum tuberosum OX=4113 GN=102578219 PE=3 SV=1			M1BNS7
CDF/WT	-0.802	0.00265274	3.68	0.029	4	3	PGSC0003DMG400028021	M1CPL5	M1CPL5|M1CPL5_SOLTU secoisolariciresinol dehydrogenase-like OS=Solanum tuberosum OX=4113 GN=102601716 PE=4 SV=1			M1CPL5
CDF/WT	-0.804	0.000593748	0.82	0.034	4	10	PGSC0003DMG400024838	M1CBF6	M1CBF6|M1CBF6_SOLTU 40S ribosomal protein S2-4-like OS=Solanum tuberosum OX=4113 GN=102581781 PE=3 SV=1			M1CBF6
CDF/WT	-0.815	0.00272853	3.79	0.029	4	2	PGSC0003DMG400014964	M1B7A2	M1B7A2|M1B7A2_SOLTU 26S protease regulatory subunit 8 homolog A OS=Solanum tuberosum OX=4113 GN=102596259 PE=3 SV=1			M1B7A2
CDF/WT	-0.845	0.00482488	6.7	0.033	4	1	PGSC0003DMG400024723	M1CAV1	M1CAV1|M1CAV1_SOLTU 60S ribosomal protein L18-2 OS=Solanum tuberosum OX=4113 GN=102585572 PE=4 SV=1			M1CAV1
CDF/WT	-0.848	0.00448827	6.23	0.033	4	1	PGSC0003DMG400007707	M1ACS2	M1ACS2|M1ACS2_SOLTU 60S ribosomal protein L13a-4 OS=Solanum tuberosum OX=4113 GN=102587601 PE=3 SV=1			M1ACS2
CDF/WT	-0.856	0.00479988	6.67	0.033	4	1	PGSC0003DMG400031758	M1D4F6	M1D4F6|M1D4F6_SOLTU phospholipase A1-IIgamma-like OS=Solanum tuberosum OX=4113 GN=102585794 PE=4 SV=1			M1D4F6
CDF/WT	-0.858	0.00662046	9.2	0.038	3	1	PGSC0003DMG400028137	M1CQ21	M1CQ21|M1CQ21_SOLTU fasciclin-like arabinogalactan protein 16 OS=Solanum tuberosum OX=4113 GN=102590244 PE=4 SV=1			M1CQ21
CDF/WT	-0.872	0.00448827	6.23	0.033	4	1	PGSC0003DMG400031258	A4UV11	A4UV11|A4UV11_SOLTU Putative ribosomal protein L34e OS=Solanum tuberosum OX=4113 GN=102605171 PE=4 SV=1			A4UV11
CDF/WT	-0.885	0.00381992	5.31	0.032	4	1	PGSC0003DMG400009588	Q2V995	Q2V995|Q2V995_SOLTU Cytoplasmic ribosomal protein S13-like OS=Solanum tuberosum OX=4113 GN=102582176 PE=2 SV=1			Q2V995
CDF/WT	-0.887	0.00415208	5.77	0.032	4	1	PGSC0003DMG402015759	Q3HRW1	Q3HRW1|Q3HRW1_SOLTU 60S ribosomal protein L13a-like protein OS=Solanum tuberosum OX=4113 GN=102584826 PE=2 SV=1			Q3HRW1
CDF/WT	-0.893	0.000974354	1.35	0.034	4	4	PGSC0003DMG400013598	M1B275	M1B275|M1B275_SOLTU Uncharacterized protein OS=Solanum tuberosum OX=4113 PE=4 SV=1			M1B275
CDF/WT	-0.893	0.00107303	1.49	0.032	4	4	PGSC0003DMG400019360	M1BPE5	M1BPE5|M1BPE5_SOLTU 40S ribosomal protein S24 OS=Solanum tuberosum OX=4113 GN=102590529 PE=3 SV=1			M1BPE5
CDF/WT	-0.894	0.00397908	5.53	0.032	4	1	PGSC0003DMG400011741	M1AUK8	M1AUK8|M1AUK8_SOLTU 60S ribosomal protein L27 OS=Solanum tuberosum OX=4113 GN=102600958 PE=3 SV=1			M1AUK8
CDF/WT	-0.897	0.00169641	2.36	0.028	4	2	PGSC0003DMG400021812	M1BZ12	M1BZ12|M1BZ12_SOLTU 60S ribosomal protein L8-like OS=Solanum tuberosum OX=4113 GN=102583499 PE=4 SV=1			M1BZ12
CDF/WT	-0.902	0.00210987	2.93	0.028	4	2	PGSC0003DMG400017608	K7XKT4	K7XKT4|K7XKT4_SOLTU 60S ribosomal protein L4-1-like OS=Solanum tuberosum OX=4113 GN=102590167 PE=2 SV=1			K7XKT4
CDF/WT	-0.909	0.00129251	1.8	0.029	4	3	PGSC0003DMG402019209	M1BNR7	M1BNR7|M1BNR7_SOLTU THO complex subunit 4A-like OS=Solanum tuberosum OX=4113 GN=102603961 PE=4 SV=1			M1BNR7
CDF/WT	-0.915	0.00389788	5.41	0.032	4	1	PGSC0003DMG400021420	M1BXI3	M1BXI3|M1BXI3_SOLTU Uncharacterized protein OS=Solanum tuberosum OX=4113 PE=3 SV=1			M1BXI3
CDF/WT	-0.924	0.00164101	2.28	0.028	4	2	PGSC0003DMG400027045	Q2XPX9	Q2XPX9|Q2XPX9_SOLTU 40S ribosomal protein S3a OS=Solanum tuberosum OX=4113 GN=102590512 PE=2 SV=1			Q2XPX9
CDF/WT	-0.925	0.00353697	4.91	0.032	4	1	PGSC0003DMG400009063	M1AIA5	M1AIA5|M1AIA5_SOLTU 60S ribosomal protein L26-1-like OS=Solanum tuberosum OX=4113 GN=102596561 PE=3 SV=1			M1AIA5
CDF/WT	-0.925	0.00127516	1.77	0.029	4	5	PGSC0003DMG400033684	Q2XPV8	Q2XPV8|Q2XPV8_SOLTU 40S ribosomal protein S3a OS=Solanum tuberosum OX=4113 PE=2 SV=1			Q2XPV8
CDF/WT	-0.934	0.00113017	1.57	0.031	4	5	PGSC0003DMG400011047	M1ARJ5	M1ARJ5|M1ARJ5_SOLTU Uncharacterized protein OS=Solanum tuberosum OX=4113 PE=4 SV=1			M1ARJ5
CDF/WT	-0.94	0.000605094	0.84	0.034	4	7	PGSC0003DMG400027630	M1CN41	M1CN41|M1CN41_SOLTU Uncharacterized protein OS=Solanum tuberosum OX=4113 PE=4 SV=1			M1CN41
CDF/WT	-0.941	0.000555554	0.77	0.041	4	6	PGSC0003DMG400021170	M1BWI7	M1BWI7|M1BWI7_SOLTU 40S ribosomal protein S4 OS=Solanum tuberosum OX=4113 GN=102587726 PE=3 SV=1			M1BWI7
CDF/WT	-0.954	0.00161343	2.24	0.029	4	2	PGSC0003DMG400023925	Q3HRX7	Q3HRX7|Q3HRX7_SOLTU Ribosomal protein L25-like protein OS=Solanum tuberosum OX=4113 GN=102588879 PE=2 SV=1			Q3HRX7
CDF/WT	-0.962	0.00333327	4.63	0.033	4	1	PGSC0003DMG402027186	M1CLD2	M1CLD2|M1CLD2_SOLTU 60S ribosomal protein L35a-3-like OS=Solanum tuberosum OX=4113 GN=102589364 PE=3 SV=1			M1CLD2
CDF/WT	-0.982	0.00422213	5.86	0.033	4	1	PGSC0003DMG400010809	M1AQK4	M1AQK4|M1AQK4_SOLTU Pectinmethylesterase inhibitor OS=Solanum tuberosum OX=4113 GN=102593637 PE=2 SV=1			M1AQK4
CDF/WT	-1.012	0.000778685	1.08	0.034	4	4	PGSC0003DMG400025998	M1CGC1	M1CGC1|M1CGC1_SOLTU Uncharacterized protein OS=Solanum tuberosum OX=4113 PE=4 SV=1			M1CGC1
CDF/WT	-1.024	0.00056047	0.78	0.039	4	5	PGSC0003DMG400013270	M1B0U4	M1B0U4|M1B0U4_SOLTU 60S ribosomal protein L6-like OS=Solanum tuberosum OX=4113 GN=102601402 PE=4 SV=1			M1B0U4
CDF/WT	-1.052	0.00179244	2.49	0.028	4	2	PGSC0003DMG400007685	Q2XPX2	Q2XPX2|Q2XPX2_SOLTU 40S ribosomal protein S3a OS=Solanum tuberosum OX=4113 GN=102577548 PE=2 SV=1			Q2XPX2
CDF/WT	-1.069	0.0013768	1.91	0.029	4	2	PGSC0003DMG400027902	M1CP74	M1CP74|M1CP74_SOLTU zinc finger CCCH domain-containing protein 11 OS=Solanum tuberosum OX=4113 GN=102578769 PE=4 SV=1			M1CP74
CDF/WT	-1.095	0.00329305	4.57	0.033	3	1	PGSC0003DMG400001550	M0ZMK7	M0ZMK7|M0ZMK7_SOLTU Uncharacterized protein OS=Solanum tuberosum OX=4113 PE=3 SV=1			M0ZMK7
CDF/WT	-1.1	0.00104371	1.45	0.033	4	5	PGSC0003DMG400006991	M1A9V7	M1A9V7|M1A9V7_SOLTU 40S ribosomal protein S13 OS=Solanum tuberosum OX=4113 PE=3 SV=1			M1A9V7
CDF/WT	-1.106	0.00206519	2.87	0.028	4	1	PGSC0003DMG400031789	M1D4J7	M1D4J7|M1D4J7_SOLTU 60S ribosomal protein L18-2 OS=Solanum tuberosum OX=4113 GN=102604004 PE=4 SV=1			M1D4J7
CDF/WT	-1.151	0.000605094	0.84	0.032	4	6	PGSC0003DMG401005911	M1A5H7	M1A5H7|M1A5H7_SOLTU Uncharacterized protein OS=Solanum tuberosum OX=4113 GN=102593885 PE=3 SV=1			M1A5H7
CDF/WT	-1.152	0.00058769	0.82	0.035	4	4	PGSC0003DMG400022511	Q2XPW4	Q2XPW4|Q2XPW4_SOLTU 60S ribosomal protein L7A-like protein OS=Solanum tuberosum OX=4113 GN=102577601 PE=2 SV=1			Q2XPW4
CDF/WT	-1.213	0.00124025	1.72	0.03	4	2	PGSC0003DMG400015795	K7W5I7	K7W5I7|K7W5I7_SOLTU 60S ribosomal protein L36 OS=Solanum tuberosum OX=4113 GN=102603301 PE=2 SV=1			K7W5I7
CDF/WT	-1.221	0.0162486	22.57	0.049	1	1	PGSC0003DMG400027053	M1CKQ7	M1CKQ7|M1CKQ7_SOLTU miraculin-like OS=Solanum tuberosum OX=4113 GN=102597848 PE=4 SV=1			M1CKQ7
CDF/WT	-1.226	0.000563797	0.78	0.037	4	4	PGSC0003DMG400021170	P46300	P46300|RS4_SOLTU 40S ribosomal protein S4 OS=Solanum tuberosum OX=4113 GN=RPS4 PE=2 SV=1			P46300
CDF/WT	-1.233	0.00172726	2.4	0.028	4	1	PGSC0003DMG400035337	M1DA81	M1DA81|M1DA81_SOLTU 60S ribosomal protein L26-1 OS=Solanum tuberosum OX=4113 GN=102588872 PE=3 SV=1			M1DA81
CDF/WT	-1.244	0.000544158	0.76	0.044	4	3	PGSC0003DMG400015245	Q307X7	Q307X7|Q307X7_SOLTU Ribosomal protein PETRP-like OS=Solanum tuberosum OX=4113 GN=102577682 PE=2 SV=1			Q307X7
CDF/WT	-1.253	0.00184464	2.56	0.028	4	1	PGSC0003DMG400024275	M1C8Z8	M1C8Z8|M1C8Z8_SOLTU gamma aminobutyrate transaminase, chloroplastic OS=Solanum tuberosum OX=4113 GN=102596238 PE=3 SV=1			M1C8Z8
CDF/WT	-1.289	0.00886323	12.31	0.041	1	1	PGSC0003DMG400029085	M1CU70	M1CU70|M1CU70_SOLTU 5'-methylthioadenosine/S-adenosylhomocysteine nucleosidase-like OS=Solanum tuberosum OX=4113 GN=102601008 PE=4 SV=1			M1CU70
CDF/WT	-1.314	0.00205317	2.85	0.028	4	1	PGSC0003DMG400008445	M1AFN7	M1AFN7|M1AFN7_SOLTU 60S ribosomal protein L6-like OS=Solanum tuberosum OX=4113 GN=102594318 PE=4 SV=1			M1AFN7
CDF/WT	-1.334	0.0153065	21.26	0.048	4	2	PGSC0003DMG400029565	M1CW30	M1CW30|M1CW30_SOLTU Uncharacterized protein OS=Solanum tuberosum OX=4113 PE=3 SV=1			M1CW30
CDF/WT	-1.377	0.00342851	4.76	0.033	2	1	PGSC0003DMG400001128	M0ZKU8	M0ZKU8|M0ZKU8_SOLTU 40S ribosomal protein S15-like OS=Solanum tuberosum OX=4113 GN=102590786 PE=3 SV=1			M0ZKU8
CDF/WT	-1.399	0.00148436	2.06	0.028	4	1	PGSC0003DMG400023512	M1C5W2	M1C5W2|M1C5W2_SOLTU 60S ribosomal protein L35 OS=Solanum tuberosum OX=4113 GN=102598040 PE=3 SV=1			M1C5W2
CDF/WT	-1.399	0.00191917	2.67	0.028	4	1	PGSC0003DMG400025228	M1CD67	M1CD67|M1CD67_SOLTU gamma aminobutyrate transaminase 2-like OS=Solanum tuberosum OX=4113 GN=102597871 PE=3 SV=1			M1CD67
CDF/WT	-1.408	0.0139276	19.35	0.047	1	1	PGSC0003DMG400026983	M1CKD4	M1CKD4|M1CKD4_SOLTU 60S ribosomal protein L17-1-like OS=Solanum tuberosum OX=4113 GN=102580390 PE=3 SV=1			M1CKD4
CDF/WT	-1.455	0.000555554	0.77	0.043	4	2	PGSC0003DMG400020813	M1BV98	M1BV98|M1BV98_SOLTU 60S ribosomal protein L7-like OS=Solanum tuberosum OX=4113 GN=102601657 PE=4 SV=1			M1BV98
CDF/WT	-1.64	0.000835494	1.16	0.033	4	2	PGSC0003DMG400019272	M1BP14	M1BP14|M1BP14_SOLTU 60S ribosomal protein L8-like OS=Solanum tuberosum OX=4113 GN=102579483 PE=4 SV=1			M1BP14
CDF/WT	-1.821	0.000628287	0.87	0.032	3	2	PGSC0003DMG400006661	M1A8I4	M1A8I4|M1A8I4_SOLTU Uncharacterized protein OS=Solanum tuberosum OX=4113 PE=4 SV=1			M1A8I4
CDF/WT	-2.177	0.000867576	1.21	0.031	2	2	PGSC0003DMG401004570	M0ZZV1	M0ZZV1|M0ZZV1_SOLTU troponin T, fast skeletal muscle OS=Solanum tuberosum OX=4113 GN=102584411 PE=4 SV=1			M0ZZV1
CDF/WT	-2.333	0.000640937	0.89	0.032	3	1	PGSC0003DMG400031844	M1D4T3	M1D4T3|M1D4T3_SOLTU 2-hydroxyisoflavanone dehydratase-like OS=Solanum tuberosum OX=4113 GN=102586757 PE=4 SV=1			M1D4T3
