# Supplementary material for: Ectopic expression of the AtCDF1 transcription factor in potato enhances tuber starch and amino acid contents and yield under open field conditions
Source: Front Plant Sci. 2023 Mar 1;14:1010669. doi: 10.3389/fpls.2023.1010669 (PMC10014720; doi:10.3389/fpls.2023.1010669)
Supplement: Supplementary file 8 [file Table_2.xlsx]

## Sheet: Up regulated 
Supplemental table 2. List of all the GO terms associated with the regulated proteins.
GO analyses of up-regulated proteins.
GO.ID	Description	p.Val	FDR	Genes
GOMF
GO:0019904	protein domain specific binding	2.698e+06	2.698e+06	PGSC0003DMG400024187,PGSC0003DMG400016221,PGSC0003DMG400006415,PGSC0003DMG400017753,PGSC0003DMG400012899,PGSC0003DMG400023590,PGSC0003DMG400020425,PGSC0003DMG400009672
GO:0051082	unfolded protein binding	1.8123e+09	1.8123e+09	PGSC0003DMG400009647,PGSC0003DMG400001718,PGSC0003DMG400009509,PGSC0003DMG402028569,PGSC0003DMG400023453,PGSC0003DMG400029787,PGSC0003DMG400022159,PGSC0003DMG400012675,PGSC0003DMG400026124,PGSC0003DMG400028115,PGSC0003DMG400026026,PGSC0003DMG400000444,PGSC0003DMG400006829
GO:0061608	nuclear import signal receptor activity	0.0000012607607629370427	0.0000012607607629370427	PGSC0003DMG400018525,PGSC0003DMG400023766,PGSC0003DMG400002759,PGSC0003DMG400015862,PGSC0003DMG401004281,PGSC0003DMG400014989
GO:0008139	nuclear localization sequence binding	0.0000012607607629370427	0.0000012607607629370427	PGSC0003DMG400018525,PGSC0003DMG400023766,PGSC0003DMG400002759,PGSC0003DMG400015862,PGSC0003DMG401004281,PGSC0003DMG400014989
GO:0140142	nucleocytoplasmic carrier activity	0.000004564640006274586	0.000004564640006274586	PGSC0003DMG400018525,PGSC0003DMG400023766,PGSC0003DMG400002759,PGSC0003DMG400015862,PGSC0003DMG401004281,PGSC0003DMG400014989
GO:0140597	protein carrier activity	0.000017764958935623705	0.000017764958935623705	PGSC0003DMG400018525,PGSC0003DMG400023766,PGSC0003DMG400002759,PGSC0003DMG400015862,PGSC0003DMG401004281,PGSC0003DMG400014989
GO:0033218	amide binding	0.000017886234895017812	0.000017886234895017812	PGSC0003DMG400018525,PGSC0003DMG400023766,PGSC0003DMG401020076,PGSC0003DMG400028418,PGSC0003DMG400002759,PGSC0003DMG400014627,PGSC0003DMG400015862,PGSC0003DMG401004281,PGSC0003DMG400014989
GO:0005048	signal sequence binding	0.00004321181093963817	0.00004321181093963817	PGSC0003DMG400018525,PGSC0003DMG400023766,PGSC0003DMG400028418,PGSC0003DMG400002759,PGSC0003DMG400015862,PGSC0003DMG401004281,PGSC0003DMG400014989
GO:0042277	peptide binding	0.00004495971540958116	0.00004495971540958116	PGSC0003DMG400018525,PGSC0003DMG400023766,PGSC0003DMG400028418,PGSC0003DMG400002759,PGSC0003DMG400014627,PGSC0003DMG400015862,PGSC0003DMG401004281,PGSC0003DMG400014989
GO:0016830	carbon-carbon lyase activity	0.00006797045569373116	0.00006797045569373116	PGSC0003DMG400012012,PGSC0003DMG400013331,PGSC0003DMG400006270,PGSC0003DMG400012387,PGSC0003DMG400023524,PGSC0003DMG400020422,PGSC0003DMG400029847,PGSC0003DMG400022953,PGSC0003DMG400027735,PGSC0003DMG400030565
GO:0016887	ATPase	0.00026365545818509653	0.00026365545818509653	PGSC0003DMG400025349,PGSC0003DMG400024389,PGSC0003DMG400001718,PGSC0003DMG400001148,PGSC0003DMG400008196,PGSC0003DMG400009421,PGSC0003DMG401011206,PGSC0003DMG400009509,PGSC0003DMG402028569,PGSC0003DMG401029299,PGSC0003DMG400011997,PGSC0003DMG400024011,PGSC0003DMG400002537,PGSC0003DMG400023453,PGSC0003DMG400029787,PGSC0003DMG400022159,PGSC0003DMG400012675,PGSC0003DMG400026124,PGSC0003DMG400026026,…
GO:0140104	molecular carrier activity	0.0006775795111764819	0.0006775795111764819	PGSC0003DMG400018525,PGSC0003DMG400023766,PGSC0003DMG400002759,PGSC0003DMG400015862,PGSC0003DMG401004281,PGSC0003DMG400014989
GO:0031267	small GTPase binding	0.0014135561459669428	0.0014135561459669428	PGSC0003DMG400018525,PGSC0003DMG400023766,PGSC0003DMG400015862,PGSC0003DMG401004281
GO:0051020	GTPase binding	0.0020263639817749116	0.0020263639817749116	PGSC0003DMG400018525,PGSC0003DMG400023766,PGSC0003DMG400015862,PGSC0003DMG401004281
GO:0016209	antioxidant activity	0.003729059098043272	0.003729059098043272	PGSC0003DMG400026281,PGSC0003DMG400027577,PGSC0003DMG400005247,PGSC0003DMG400017714,PGSC0003DMG400028238,PGSC0003DMG400014867,PGSC0003DMG400016387,PGSC0003DMG400030056,PGSC0003DMG400012344,PGSC0003DMG400005273
GO:0016831	carboxy-lyase activity	0.008320953709851916	0.008320953709851916	PGSC0003DMG400013331,PGSC0003DMG400006270,PGSC0003DMG400012387,PGSC0003DMG400023524,PGSC0003DMG400020422,PGSC0003DMG400022953,PGSC0003DMG400027735
GO:0030234	enzyme regulator activity	0.01381067989346584	0.01381067989346584	PGSC0003DMG400008536,PGSC0003DMG400010137,PGSC0003DMG400005950,PGSC0003DMG400027048,PGSC0003DMG400030628,PGSC0003DMG401006167,PGSC0003DMG400033685,PGSC0003DMG400010146,PGSC0003DMG400028115,PGSC0003DMG402009395,PGSC0003DMG400015761,PGSC0003DMG400009775
GO:0098772	molecular function regulator	0.01381067989346584	0.01381067989346584	PGSC0003DMG400008536,PGSC0003DMG400010137,PGSC0003DMG400005950,PGSC0003DMG400027048,PGSC0003DMG400030628,PGSC0003DMG401006167,PGSC0003DMG400033685,PGSC0003DMG400010146,PGSC0003DMG400028115,PGSC0003DMG402009395,PGSC0003DMG400015761,PGSC0003DMG400009775
GO:0005471	ATP:ADP antiporter activity	0.017215284784815287	0.017215284784815287	PGSC0003DMG400031867,PGSC0003DMG400032824,PGSC0003DMG400013596
GO:0015078	proton transmembrane transporter activity	0.020425088649845984	0.020425088649845984	PGSC0003DMG400024638,PGSC0003DMG400006869,PGSC0003DMG400009421,PGSC0003DMG401011206,PGSC0003DMG400027374,PGSC0003DMG400030628,PGSC0003DMG400001656,PGSC0003DMG400030682
GO:0004801	transaldolase activity	0.03327475305818669	0.03327475305818669	PGSC0003DMG402028027,PGSC0003DMG400004791
GO:0003871	5-methyltetrahydropteroyltriglutamate-homocysteine S-methyltransferase activity	0.03327475305818669	0.03327475305818669	PGSC0003DMG400028127,PGSC0003DMG400008708
GO:0042085	5-methyltetrahydropteroyltri-L-glutamate-dependent methyltransferase activity	0.03327475305818669	0.03327475305818669	PGSC0003DMG400028127,PGSC0003DMG400008708
GO:0015217	ADP transmembrane transporter activity	0.03636601962539155	0.03636601962539155	PGSC0003DMG400031867,PGSC0003DMG400032824,PGSC0003DMG400013596
GO:0005544	calcium-dependent phospholipid binding	0.03636601962539155	0.03636601962539155	PGSC0003DMG400007966,PGSC0003DMG400001879,PGSC0003DMG400017714
GO:0016684	oxidoreductase activity, acting on peroxide as acceptor	0.04432092947089448	0.04432092947089448	PGSC0003DMG400026281,PGSC0003DMG400017714,PGSC0003DMG400028238,PGSC0003DMG400014867,PGSC0003DMG400016387,PGSC0003DMG400030056,PGSC0003DMG400012344,PGSC0003DMG400005273
GOBP
GO:0006457	protein folding	4.22545e+06	4.22545e+06	PGSC0003DMG400009647,PGSC0003DMG400001718,PGSC0003DMG400001148,PGSC0003DMG400009509,PGSC0003DMG402028569,PGSC0003DMG400011997,PGSC0003DMG400024011,PGSC0003DMG400002537,PGSC0003DMG400023453,PGSC0003DMG400029787,PGSC0003DMG400022159,PGSC0003DMG400012675,PGSC0003DMG400026124,PGSC0003DMG400005758,PGSC0003DMG400028115,PGSC0003DMG400026026,PGSC0003DMG400000444,PGSC0003DMG400006829
GO:0046034	ATP metabolic process	0.0000035430722074272706	0.0000035430722074272706	PGSC0003DMG400029087,PGSC0003DMG400024638,PGSC0003DMG400012012,PGSC0003DMG400006869,PGSC0003DMG400027374,PGSC0003DMG400030628,PGSC0003DMG400001656,PGSC0003DMG400020224,PGSC0003DMG400010007,PGSC0003DMG400028177,PGSC0003DMG400030565,PGSC0003DMG400029309,PGSC0003DMG401024510
GO:0006091	generation of precursor metabolites and energy	0.000013134618554231291	0.000013134618554231291	PGSC0003DMG400000127,PGSC0003DMG400029087,PGSC0003DMG400012012,PGSC0003DMG400006869,PGSC0003DMG402028027,PGSC0003DMG400005471,PGSC0003DMG400005465,PGSC0003DMG400004791,PGSC0003DMG400030628,PGSC0003DMG400012387,PGSC0003DMG400018511,PGSC0003DMG400028982,PGSC0003DMG400016589,PGSC0003DMG400020422,PGSC0003DMG400020224,PGSC0003DMG400010007,PGSC0003DMG400001932,PGSC0003DMG400028177,PGSC0003DMG400030565,…
GO:0044281	small molecule metabolic process	0.000020212022497468914	0.000020212022497468914	PGSC0003DMG400004999,PGSC0003DMG400024638,PGSC0003DMG400012012,PGSC0003DMG400006869,PGSC0003DMG400018269,PGSC0003DMG400020999,PGSC0003DMG400024095,PGSC0003DMG400030019,PGSC0003DMG400027374,PGSC0003DMG400001656,PGSC0003DMG400013331,PGSC0003DMG400018350,PGSC0003DMG400004572,PGSC0003DMG400023524,PGSC0003DMG400028982,PGSC0003DMG400024627,PGSC0003DMG400021527,PGSC0003DMG400003615,PGSC0003DMG400016589,…
GO:0006098	pentose-phosphate shunt	0.00007376462541093488	0.00007376462541093488	PGSC0003DMG402028027,PGSC0003DMG400005471,PGSC0003DMG400004791,PGSC0003DMG400018511,PGSC0003DMG400001932,PGSC0003DMG400007019
GO:0006740	NADPH regeneration	0.00007376462541093488	0.00007376462541093488	PGSC0003DMG402028027,PGSC0003DMG400005471,PGSC0003DMG400004791,PGSC0003DMG400018511,PGSC0003DMG400001932,PGSC0003DMG400007019
GO:0006575	cellular modified amino acid metabolic process	0.00042227340769068967	0.00042227340769068967	PGSC0003DMG400012210,PGSC0003DMG400018269,PGSC0003DMG400004572,PGSC0003DMG400010333,PGSC0003DMG400029847,PGSC0003DMG400014627,PGSC0003DMG400004977,PGSC0003DMG400025527,PGSC0003DMG400016168,PGSC0003DMG400015731
GO:0051156	glucose 6-phosphate metabolic process	0.00046370032908931694	0.00046370032908931694	PGSC0003DMG402028027,PGSC0003DMG400005471,PGSC0003DMG400004791,PGSC0003DMG400018511,PGSC0003DMG400001932,PGSC0003DMG400007019
GO:0017038	protein import	0.0005325793815123851	0.0005325793815123851	PGSC0003DMG400018525,PGSC0003DMG400023766,PGSC0003DMG400027048,PGSC0003DMG400009672,PGSC0003DMG400002759,PGSC0003DMG400015862,PGSC0003DMG400028115,PGSC0003DMG401004281,PGSC0003DMG400014989
GO:0006739	NADP metabolic process	0.0006764938215105755	0.0006764938215105755	PGSC0003DMG402028027,PGSC0003DMG400005471,PGSC0003DMG400004791,PGSC0003DMG400018511,PGSC0003DMG400001932,PGSC0003DMG400007019
GO:0006606	protein import into nucleus	0.0008094915752505499	0.0008094915752505499	PGSC0003DMG400018525,PGSC0003DMG400023766,PGSC0003DMG400002759,PGSC0003DMG400015862,PGSC0003DMG401004281,PGSC0003DMG400014989
GO:0051170	import into nucleus	0.0009631025774673727	0.0009631025774673727	PGSC0003DMG400018525,PGSC0003DMG400023766,PGSC0003DMG400002759,PGSC0003DMG400015862,PGSC0003DMG401004281,PGSC0003DMG400014989
GO:0019637	organophosphate metabolic process	0.0011044389192513427	0.0011044389192513427	PGSC0003DMG400029788,PGSC0003DMG400024638,PGSC0003DMG400012012,PGSC0003DMG400006869,PGSC0003DMG402028027,PGSC0003DMG400005471,PGSC0003DMG400004791,PGSC0003DMG400027374,PGSC0003DMG400001656,PGSC0003DMG400018511,PGSC0003DMG400021527,PGSC0003DMG400010007,PGSC0003DMG400015187,PGSC0003DMG400001932,PGSC0003DMG400012391,PGSC0003DMG400028177,PGSC0003DMG400030565,PGSC0003DMG400029309,PGSC0003DMG401024510,…
GO:0034504	protein localization to nucleus	0.0011397039570291972	0.0011397039570291972	PGSC0003DMG400018525,PGSC0003DMG400023766,PGSC0003DMG400002759,PGSC0003DMG400015862,PGSC0003DMG401004281,PGSC0003DMG400014989
GO:0043436	oxoacid metabolic process	0.00205360075431191	0.00205360075431191	PGSC0003DMG400004999,PGSC0003DMG400012012,PGSC0003DMG400018269,PGSC0003DMG400020999,PGSC0003DMG400030019,PGSC0003DMG400013331,PGSC0003DMG400004572,PGSC0003DMG400028982,PGSC0003DMG400029847,PGSC0003DMG400030577,PGSC0003DMG400011436,PGSC0003DMG400010007,PGSC0003DMG400024926,PGSC0003DMG400028127,PGSC0003DMG400001932,PGSC0003DMG400012391,PGSC0003DMG400028177,PGSC0003DMG400008708,PGSC0003DMG400016168,…
GO:0006082	organic acid metabolic process	0.004805468246203935	0.004805468246203935	PGSC0003DMG400004999,PGSC0003DMG400012012,PGSC0003DMG400018269,PGSC0003DMG400020999,PGSC0003DMG400030019,PGSC0003DMG400013331,PGSC0003DMG400004572,PGSC0003DMG400028982,PGSC0003DMG400029847,PGSC0003DMG400030577,PGSC0003DMG400011436,PGSC0003DMG400010007,PGSC0003DMG400024926,PGSC0003DMG400028127,PGSC0003DMG400001932,PGSC0003DMG400012391,PGSC0003DMG400028177,PGSC0003DMG400008708,PGSC0003DMG400016168,…
GO:0009987	cellular process	0.004924956322115628	0.004924956322115628	PGSC0003DMG400008536,PGSC0003DMG400010137,PGSC0003DMG400029829,PGSC0003DMG400031867,PGSC0003DMG400019701,PGSC0003DMG400017152,PGSC0003DMG400016231,PGSC0003DMG400029788,PGSC0003DMG400000127,PGSC0003DMG400029087,PGSC0003DMG400027143,PGSC0003DMG400025349,PGSC0003DMG400009647,PGSC0003DMG400024389,PGSC0003DMG400004999,PGSC0003DMG400012259,PGSC0003DMG400018525,PGSC0003DMG400024638,PGSC0003DMG400012012,…
GO:0019752	carboxylic acid metabolic process	0.005253562305855963	0.005253562305855963	PGSC0003DMG400012012,PGSC0003DMG400018269,PGSC0003DMG400020999,PGSC0003DMG400030019,PGSC0003DMG400013331,PGSC0003DMG400004572,PGSC0003DMG400028982,PGSC0003DMG400029847,PGSC0003DMG400030577,PGSC0003DMG400011436,PGSC0003DMG400010007,PGSC0003DMG400024926,PGSC0003DMG400028127,PGSC0003DMG400001932,PGSC0003DMG400012391,PGSC0003DMG400028177,PGSC0003DMG400008708,PGSC0003DMG400016168,PGSC0003DMG400030565,…
GO:1990544	mitochondrial ATP transmembrane transport	0.006095326012034801	0.006095326012034801	PGSC0003DMG400031867,PGSC0003DMG400032824,PGSC0003DMG400013596
GO:0140021	mitochondrial ADP transmembrane transport	0.006095326012034801	0.006095326012034801	PGSC0003DMG400031867,PGSC0003DMG400032824,PGSC0003DMG400013596
GO:0055086	nucleobase-containing small molecule metabolic process	0.006580241868345235	0.006580241868345235	PGSC0003DMG400024638,PGSC0003DMG400012012,PGSC0003DMG400006869,PGSC0003DMG400027374,PGSC0003DMG400001656,PGSC0003DMG400004572,PGSC0003DMG400024627,PGSC0003DMG400021527,PGSC0003DMG400010007,PGSC0003DMG400015187,PGSC0003DMG400012391,PGSC0003DMG400028177,PGSC0003DMG400030565,PGSC0003DMG400029309,PGSC0003DMG401024510
GO:1902600	proton transmembrane transport	0.007234718792922258	0.007234718792922258	PGSC0003DMG400024389,PGSC0003DMG400024638,PGSC0003DMG400006869,PGSC0003DMG400009421,PGSC0003DMG401011206,PGSC0003DMG400027374,PGSC0003DMG400030628,PGSC0003DMG400001656,PGSC0003DMG400030682
GO:0072521	purine-containing compound metabolic process	0.008058144787822795	0.008058144787822795	PGSC0003DMG400024638,PGSC0003DMG400012012,PGSC0003DMG400006869,PGSC0003DMG400027374,PGSC0003DMG400001656,PGSC0003DMG400004572,PGSC0003DMG400021527,PGSC0003DMG400010007,PGSC0003DMG400028177,PGSC0003DMG400030565,PGSC0003DMG400029309,PGSC0003DMG401024510
GO:0006886	intracellular protein transport	0.008641297366536455	0.008641297366536455	PGSC0003DMG400018525,PGSC0003DMG400022297,PGSC0003DMG400023766,PGSC0003DMG400026695,PGSC0003DMG400010295,PGSC0003DMG400027048,PGSC0003DMG400000704,PGSC0003DMG400028418,PGSC0003DMG400009672,PGSC0003DMG400013514,PGSC0003DMG400002759,PGSC0003DMG400015862,PGSC0003DMG400028115,PGSC0003DMG401004281,PGSC0003DMG400014989
GO:1901135	carbohydrate derivative metabolic process	0.010458575780039678	0.010458575780039678	PGSC0003DMG400024638,PGSC0003DMG400012012,PGSC0003DMG400006869,PGSC0003DMG402028027,PGSC0003DMG400005471,PGSC0003DMG400004791,PGSC0003DMG400027374,PGSC0003DMG400001656,PGSC0003DMG400004572,PGSC0003DMG400018511,PGSC0003DMG400024627,PGSC0003DMG400021527,PGSC0003DMG400010007,PGSC0003DMG400001932,PGSC0003DMG400028177,PGSC0003DMG400030565,PGSC0003DMG400029309,PGSC0003DMG401024510,PGSC0003DMG400007019
GO:0009117	nucleotide metabolic process	0.011191722734142283	0.011191722734142283	PGSC0003DMG400024638,PGSC0003DMG400012012,PGSC0003DMG400006869,PGSC0003DMG400027374,PGSC0003DMG400001656,PGSC0003DMG400021527,PGSC0003DMG400010007,PGSC0003DMG400015187,PGSC0003DMG400012391,PGSC0003DMG400028177,PGSC0003DMG400030565,PGSC0003DMG400029309,PGSC0003DMG401024510
GO:0009150	purine ribonucleotide metabolic process	0.01302312346466966	0.01302312346466966	PGSC0003DMG400024638,PGSC0003DMG400012012,PGSC0003DMG400006869,PGSC0003DMG400027374,PGSC0003DMG400001656,PGSC0003DMG400021527,PGSC0003DMG400010007,PGSC0003DMG400028177,PGSC0003DMG400030565,PGSC0003DMG400029309,PGSC0003DMG401024510
GO:0042026	protein refolding	0.013885480309721431	0.013885480309721431	PGSC0003DMG400001148,PGSC0003DMG400011997,PGSC0003DMG400024011,PGSC0003DMG400002537,PGSC0003DMG400000444
GO:0006753	nucleoside phosphate metabolic process	0.01723686221002731	0.01723686221002731	PGSC0003DMG400024638,PGSC0003DMG400012012,PGSC0003DMG400006869,PGSC0003DMG400027374,PGSC0003DMG400001656,PGSC0003DMG400021527,PGSC0003DMG400010007,PGSC0003DMG400015187,PGSC0003DMG400012391,PGSC0003DMG400028177,PGSC0003DMG400030565,PGSC0003DMG400029309,PGSC0003DMG401024510
GO:1990542	mitochondrial transmembrane transport	0.018300283687918806	0.018300283687918806	PGSC0003DMG400031867,PGSC0003DMG400006869,PGSC0003DMG400027048,PGSC0003DMG400032824,PGSC0003DMG400013596,PGSC0003DMG400028115
GO:0006749	glutathione metabolic process	0.01862634019151285	0.01862634019151285	PGSC0003DMG400012210,PGSC0003DMG400018269,PGSC0003DMG400010333,PGSC0003DMG400014627,PGSC0003DMG400004977,PGSC0003DMG400025527,PGSC0003DMG400015731
GO:0006090	pyruvate metabolic process	0.01862634019151285	0.01862634019151285	PGSC0003DMG400012012,PGSC0003DMG400010007,PGSC0003DMG400028177,PGSC0003DMG400030565,PGSC0003DMG400029309,PGSC0003DMG400033874,PGSC0003DMG401024510
GO:0006163	purine nucleotide metabolic process	0.019431349191955168	0.019431349191955168	PGSC0003DMG400024638,PGSC0003DMG400012012,PGSC0003DMG400006869,PGSC0003DMG400027374,PGSC0003DMG400001656,PGSC0003DMG400021527,PGSC0003DMG400010007,PGSC0003DMG400028177,PGSC0003DMG400030565,PGSC0003DMG400029309,PGSC0003DMG401024510
GO:0034220	ion transmembrane transport	0.022633014131599138	0.022633014131599138	PGSC0003DMG400031867,PGSC0003DMG400024389,PGSC0003DMG400024638,PGSC0003DMG400006869,PGSC0003DMG400009421,PGSC0003DMG401011206,PGSC0003DMG400027374,PGSC0003DMG400030628,PGSC0003DMG400021448,PGSC0003DMG400001656,PGSC0003DMG400032824,PGSC0003DMG400017714,PGSC0003DMG400009093,PGSC0003DMG400013596,PGSC0003DMG400030682,PGSC0003DMG400006896
GO:0072594	establishment of protein localization to organelle	0.023447850571427637	0.023447850571427637	PGSC0003DMG400018525,PGSC0003DMG400023766,PGSC0003DMG400027048,PGSC0003DMG400028418,PGSC0003DMG400009672,PGSC0003DMG400002759,PGSC0003DMG400015862,PGSC0003DMG400028115,PGSC0003DMG401004281,PGSC0003DMG400014989
GO:0015980	energy derivation by oxidation of organic compounds	0.02523433658618411	0.02523433658618411	PGSC0003DMG400029087,PGSC0003DMG400006869,PGSC0003DMG400030628,PGSC0003DMG400012387,PGSC0003DMG400028982,PGSC0003DMG400016589,PGSC0003DMG400020422,PGSC0003DMG400020224
GO:0009259	ribonucleotide metabolic process	0.030562733160253208	0.030562733160253208	PGSC0003DMG400024638,PGSC0003DMG400012012,PGSC0003DMG400006869,PGSC0003DMG400027374,PGSC0003DMG400001656,PGSC0003DMG400021527,PGSC0003DMG400010007,PGSC0003DMG400028177,PGSC0003DMG400030565,PGSC0003DMG400029309,PGSC0003DMG401024510
GO:0046907	intracellular transport	0.03237359442078442	0.03237359442078442	PGSC0003DMG400018525,PGSC0003DMG400022297,PGSC0003DMG400006869,PGSC0003DMG400023766,PGSC0003DMG400026695,PGSC0003DMG400010295,PGSC0003DMG400027048,PGSC0003DMG400000704,PGSC0003DMG400028418,PGSC0003DMG400009672,PGSC0003DMG400013514,PGSC0003DMG400024913,PGSC0003DMG400002759,PGSC0003DMG400015862,PGSC0003DMG400028115,PGSC0003DMG401004281,PGSC0003DMG400014989
GO:0046031	ADP metabolic process	0.03476251575905155	0.03476251575905155	PGSC0003DMG400012012,PGSC0003DMG400010007,PGSC0003DMG400028177,PGSC0003DMG400030565,PGSC0003DMG400029309,PGSC0003DMG401024510
GO:0006757	ATP generation from ADP	0.03476251575905155	0.03476251575905155	PGSC0003DMG400012012,PGSC0003DMG400010007,PGSC0003DMG400028177,PGSC0003DMG400030565,PGSC0003DMG400029309,PGSC0003DMG401024510
GO:0006096	glycolytic process	0.03476251575905155	0.03476251575905155	PGSC0003DMG400012012,PGSC0003DMG400010007,PGSC0003DMG400028177,PGSC0003DMG400030565,PGSC0003DMG400029309,PGSC0003DMG401024510
GO:0019693	ribose phosphate metabolic process	0.0407118412743195	0.0407118412743195	PGSC0003DMG400024638,PGSC0003DMG400012012,PGSC0003DMG400006869,PGSC0003DMG400027374,PGSC0003DMG400001656,PGSC0003DMG400021527,PGSC0003DMG400010007,PGSC0003DMG400028177,PGSC0003DMG400030565,PGSC0003DMG400029309,PGSC0003DMG401024510
GO:0009060	aerobic respiration	0.042772220199585195	0.042772220199585195	PGSC0003DMG400029087,PGSC0003DMG400006869,PGSC0003DMG400030628,PGSC0003DMG400012387,PGSC0003DMG400028982,PGSC0003DMG400020422,PGSC0003DMG400020224
GO:0009179	purine ribonucleoside diphosphate metabolic process	0.04470645673209813	0.04470645673209813	PGSC0003DMG400012012,PGSC0003DMG400010007,PGSC0003DMG400028177,PGSC0003DMG400030565,PGSC0003DMG400029309,PGSC0003DMG401024510
GO:0009135	purine nucleoside diphosphate metabolic process	0.04470645673209813	0.04470645673209813	PGSC0003DMG400012012,PGSC0003DMG400010007,PGSC0003DMG400028177,PGSC0003DMG400030565,PGSC0003DMG400029309,PGSC0003DMG401024510
GOCC
GO:0005737	cytoplasm	1.09221e-14	1.09221e-14	PGSC0003DMG400018914,PGSC0003DMG400014104,PGSC0003DMG400029829,PGSC0003DMG400031867,PGSC0003DMG400019701,PGSC0003DMG400008749,PGSC0003DMG400016231,PGSC0003DMG400029788,PGSC0003DMG400000127,PGSC0003DMG400029087,PGSC0003DMG400025349,PGSC0003DMG400009647,PGSC0003DMG400024389,PGSC0003DMG400004999,PGSC0003DMG400012259,PGSC0003DMG400018525,PGSC0003DMG400024638,PGSC0003DMG400012012,PGSC0003DMG400022297,…
GO:0005829	cytosol	0.425174	0.425174	PGSC0003DMG400029829,PGSC0003DMG400009647,PGSC0003DMG400004999,PGSC0003DMG400012259,PGSC0003DMG400012012,PGSC0003DMG400004583,PGSC0003DMG400017933,PGSC0003DMG400028631,PGSC0003DMG400009509,PGSC0003DMG401020076,PGSC0003DMG401017153,PGSC0003DMG400024011,PGSC0003DMG400031796,PGSC0003DMG400029760,PGSC0003DMG400023453,PGSC0003DMG400003514,PGSC0003DMG400001879,PGSC0003DMG400013331,PGSC0003DMG400017714,…
GO:0005622	intracellular anatomical structure	665.796	665.796	PGSC0003DMG400018914,PGSC0003DMG400014104,PGSC0003DMG400029829,PGSC0003DMG400031867,PGSC0003DMG400019701,PGSC0003DMG400008749,PGSC0003DMG400016231,PGSC0003DMG400029788,PGSC0003DMG400000127,PGSC0003DMG400029087,PGSC0003DMG400025349,PGSC0003DMG400009647,PGSC0003DMG400024389,PGSC0003DMG400004999,PGSC0003DMG400012259,PGSC0003DMG400018525,PGSC0003DMG400024638,PGSC0003DMG400012012,PGSC0003DMG400022297,…
GO:0031966	mitochondrial membrane	4.35039e+06	4.35039e+06	PGSC0003DMG400031867,PGSC0003DMG400029087,PGSC0003DMG400024638,PGSC0003DMG400006869,PGSC0003DMG400028589,PGSC0003DMG400027374,PGSC0003DMG400027048,PGSC0003DMG400004276,PGSC0003DMG400030628,PGSC0003DMG400021448,PGSC0003DMG400001656,PGSC0003DMG400032824,PGSC0003DMG400009093,PGSC0003DMG400016222,PGSC0003DMG400013596,PGSC0003DMG400020224,PGSC0003DMG400016040,PGSC0003DMG400028115,PGSC0003DMG400006896
GO:0005740	mitochondrial envelope	8.72893e+06	8.72893e+06	PGSC0003DMG400031867,PGSC0003DMG400029087,PGSC0003DMG400024638,PGSC0003DMG400006869,PGSC0003DMG400028589,PGSC0003DMG400027374,PGSC0003DMG400027048,PGSC0003DMG400004276,PGSC0003DMG400030628,PGSC0003DMG400021448,PGSC0003DMG400001656,PGSC0003DMG400032824,PGSC0003DMG400009093,PGSC0003DMG400016222,PGSC0003DMG400013596,PGSC0003DMG400020224,PGSC0003DMG400016040,PGSC0003DMG400028115,PGSC0003DMG400006896
GO:0005743	mitochondrial inner membrane	7.93398e+08	7.93398e+08	PGSC0003DMG400031867,PGSC0003DMG400029087,PGSC0003DMG400024638,PGSC0003DMG400006869,PGSC0003DMG400027374,PGSC0003DMG400027048,PGSC0003DMG400004276,PGSC0003DMG400030628,PGSC0003DMG400001656,PGSC0003DMG400032824,PGSC0003DMG400016222,PGSC0003DMG400013596,PGSC0003DMG400020224,PGSC0003DMG400016040,PGSC0003DMG400028115
GO:0019866	organelle inner membrane	0.0000014284673984982005	0.0000014284673984982005	PGSC0003DMG400031867,PGSC0003DMG400029087,PGSC0003DMG400024638,PGSC0003DMG400006869,PGSC0003DMG400030019,PGSC0003DMG400027374,PGSC0003DMG400027048,PGSC0003DMG400004276,PGSC0003DMG400030628,PGSC0003DMG400001656,PGSC0003DMG400032824,PGSC0003DMG400016222,PGSC0003DMG400013596,PGSC0003DMG400020224,PGSC0003DMG400016040,PGSC0003DMG400028115
GO:0000502	proteasome complex	0.0000036139953214360766	0.0000036139953214360766	PGSC0003DMG400029829,PGSC0003DMG400019701,PGSC0003DMG400012259,PGSC0003DMG401006167,PGSC0003DMG400028342,PGSC0003DMG402009395,PGSC0003DMG400030476,PGSC0003DMG400015761,PGSC0003DMG400006193
GO:0032991	protein-containing complex	0.000005788508190757926	0.000005788508190757926	PGSC0003DMG400029829,PGSC0003DMG400019701,PGSC0003DMG400029087,PGSC0003DMG400025349,PGSC0003DMG400009647,PGSC0003DMG400024389,PGSC0003DMG400012259,PGSC0003DMG400024638,PGSC0003DMG400022297,PGSC0003DMG400004583,PGSC0003DMG400006869,PGSC0003DMG400017933,PGSC0003DMG400028631,PGSC0003DMG400008196,PGSC0003DMG400009421,PGSC0003DMG401011206,PGSC0003DMG400009509,PGSC0003DMG400026695,PGSC0003DMG401029299,…
GO:1905369	endopeptidase complex	0.000008797994990383456	0.000008797994990383456	PGSC0003DMG400029829,PGSC0003DMG400019701,PGSC0003DMG400012259,PGSC0003DMG401006167,PGSC0003DMG400028342,PGSC0003DMG402009395,PGSC0003DMG400030476,PGSC0003DMG400015761,PGSC0003DMG400006193
GO:0005838	proteasome regulatory particle	0.000009878439021118463	0.000009878439021118463	PGSC0003DMG400019701,PGSC0003DMG400012259,PGSC0003DMG401006167,PGSC0003DMG400028342,PGSC0003DMG402009395,PGSC0003DMG400030476,PGSC0003DMG400015761
GO:0022624	proteasome accessory complex	0.000009878439021118463	0.000009878439021118463	PGSC0003DMG400019701,PGSC0003DMG400012259,PGSC0003DMG401006167,PGSC0003DMG400028342,PGSC0003DMG402009395,PGSC0003DMG400030476,PGSC0003DMG400015761
GO:0005832	chaperonin-containing T-complex	0.000011997755133721316	0.000011997755133721316	PGSC0003DMG400023453,PGSC0003DMG400012675,PGSC0003DMG400026124,PGSC0003DMG400026026,PGSC0003DMG400006829
GO:0031967	organelle envelope	0.000017298435337556056	0.000017298435337556056	PGSC0003DMG400031867,PGSC0003DMG400016231,PGSC0003DMG400029087,PGSC0003DMG400025349,PGSC0003DMG400024638,PGSC0003DMG400006869,PGSC0003DMG400028589,PGSC0003DMG400004791,PGSC0003DMG400030019,PGSC0003DMG400027374,PGSC0003DMG400027048,PGSC0003DMG400004276,PGSC0003DMG400030628,PGSC0003DMG400006564,PGSC0003DMG400021448,PGSC0003DMG400001656,PGSC0003DMG400032824,PGSC0003DMG400009093,PGSC0003DMG400016222,…
GO:0031975	envelope	0.000017298435337556056	0.000017298435337556056	PGSC0003DMG400031867,PGSC0003DMG400016231,PGSC0003DMG400029087,PGSC0003DMG400025349,PGSC0003DMG400024638,PGSC0003DMG400006869,PGSC0003DMG400028589,PGSC0003DMG400004791,PGSC0003DMG400030019,PGSC0003DMG400027374,PGSC0003DMG400027048,PGSC0003DMG400004276,PGSC0003DMG400030628,PGSC0003DMG400006564,PGSC0003DMG400021448,PGSC0003DMG400001656,PGSC0003DMG400032824,PGSC0003DMG400009093,PGSC0003DMG400016222,…
GO:0101031	chaperone complex	0.00002983808577083566	0.00002983808577083566	PGSC0003DMG400023453,PGSC0003DMG400012675,PGSC0003DMG400026124,PGSC0003DMG400026026,PGSC0003DMG400006829
GO:0098800	inner mitochondrial membrane protein complex	0.000050788144785048644	0.000050788144785048644	PGSC0003DMG400029087,PGSC0003DMG400024638,PGSC0003DMG400006869,PGSC0003DMG400027374,PGSC0003DMG400027048,PGSC0003DMG400004276,PGSC0003DMG400030628,PGSC0003DMG400001656,PGSC0003DMG400020224,PGSC0003DMG400028115
GO:1905368	peptidase complex	0.00005927642518570358	0.00005927642518570358	PGSC0003DMG400029829,PGSC0003DMG400019701,PGSC0003DMG400012259,PGSC0003DMG401006167,PGSC0003DMG400028342,PGSC0003DMG402009395,PGSC0003DMG400030476,PGSC0003DMG400015761,PGSC0003DMG400006193
GO:0005739	mitochondrion	0.0002472897213717358	0.0002472897213717358	PGSC0003DMG400031867,PGSC0003DMG400029087,PGSC0003DMG400024638,PGSC0003DMG400006869,PGSC0003DMG400001718,PGSC0003DMG402028027,PGSC0003DMG400028589,PGSC0003DMG400030019,PGSC0003DMG400027374,PGSC0003DMG400027048,PGSC0003DMG400004276,PGSC0003DMG400030628,PGSC0003DMG400021448,PGSC0003DMG400001656,PGSC0003DMG400032824,PGSC0003DMG400017714,PGSC0003DMG400009093,PGSC0003DMG400016222,PGSC0003DMG400028982,…
GO:0008541	proteasome regulatory particle, lid subcomplex	0.0005112171918765313	0.0005112171918765313	PGSC0003DMG400019701,PGSC0003DMG400012259,PGSC0003DMG401006167,PGSC0003DMG400028342
GO:0016469	proton-transporting two-sector ATPase complex	0.0007926892591281204	0.0007926892591281204	PGSC0003DMG400024389,PGSC0003DMG400024638,PGSC0003DMG400006869,PGSC0003DMG400009421,PGSC0003DMG401011206,PGSC0003DMG400027374,PGSC0003DMG400001656
GO:0098796	membrane protein complex	0.001938979384449619	0.001938979384449619	PGSC0003DMG400029087,PGSC0003DMG400024389,PGSC0003DMG400024638,PGSC0003DMG400022297,PGSC0003DMG400006869,PGSC0003DMG400009421,PGSC0003DMG401011206,PGSC0003DMG400026695,PGSC0003DMG400027374,PGSC0003DMG400027048,PGSC0003DMG400004276,PGSC0003DMG400030628,PGSC0003DMG400000704,PGSC0003DMG400001656,PGSC0003DMG400028418,PGSC0003DMG400020224,PGSC0003DMG400024913,PGSC0003DMG400028115,PGSC0003DMG400006896
GO:0098798	mitochondrial protein-containing complex	0.003102922162197806	0.003102922162197806	PGSC0003DMG400029087,PGSC0003DMG400024638,PGSC0003DMG400006869,PGSC0003DMG400027374,PGSC0003DMG400027048,PGSC0003DMG400004276,PGSC0003DMG400030628,PGSC0003DMG400001656,PGSC0003DMG400020224,PGSC0003DMG400028115
GO:0031090	organelle membrane	0.004425986906315921	0.004425986906315921	PGSC0003DMG400031867,PGSC0003DMG400016231,PGSC0003DMG400029087,PGSC0003DMG400024389,PGSC0003DMG400024638,PGSC0003DMG400006869,PGSC0003DMG400009421,PGSC0003DMG401011206,PGSC0003DMG400028589,PGSC0003DMG400026695,PGSC0003DMG400030019,PGSC0003DMG400027374,PGSC0003DMG400027048,PGSC0003DMG400004276,PGSC0003DMG400030628,PGSC0003DMG400006564,PGSC0003DMG400000704,PGSC0003DMG400021448,PGSC0003DMG400001656,…
GO:0009536	plastid	0.006214179710302947	0.006214179710302947	PGSC0003DMG400018914,PGSC0003DMG400016231,PGSC0003DMG400029087,PGSC0003DMG400025349,PGSC0003DMG400024638,PGSC0003DMG400012210,PGSC0003DMG402028027,PGSC0003DMG400004791,PGSC0003DMG400024095,PGSC0003DMG400030019,PGSC0003DMG400027577,PGSC0003DMG400005247,PGSC0003DMG400024011,PGSC0003DMG400006564,PGSC0003DMG400029575,PGSC0003DMG400017714,PGSC0003DMG400018350,PGSC0003DMG400012387,PGSC0003DMG400028418,…
GO:0009507	chloroplast	0.006833335186122938	0.006833335186122938	PGSC0003DMG400018914,PGSC0003DMG400016231,PGSC0003DMG400025349,PGSC0003DMG400024638,PGSC0003DMG400012210,PGSC0003DMG402028027,PGSC0003DMG400004791,PGSC0003DMG400024095,PGSC0003DMG400030019,PGSC0003DMG400027577,PGSC0003DMG400005247,PGSC0003DMG400024011,PGSC0003DMG400006564,PGSC0003DMG400029575,PGSC0003DMG400017714,PGSC0003DMG400018350,PGSC0003DMG400012387,PGSC0003DMG400028418,PGSC0003DMG400009672,…
GO:0048471	perinuclear region of cytoplasm	0.018918135182111984	0.018918135182111984	PGSC0003DMG400009509,PGSC0003DMG400029787,PGSC0003DMG400022159
GO:0000276	mitochondrial proton-transporting ATP synthase complex, coupling factor F(o)	0.025820729428450224	0.025820729428450224	PGSC0003DMG400006869,PGSC0003DMG400027374,PGSC0003DMG400001656
GO:0005753	mitochondrial proton-transporting ATP synthase complex	0.027762906172730858	0.027762906172730858	PGSC0003DMG400024638,PGSC0003DMG400006869,PGSC0003DMG400027374,PGSC0003DMG400001656
GO:0009570	chloroplast stroma	0.04147307606734534	0.04147307606734534	PGSC0003DMG400016231,PGSC0003DMG400025349,PGSC0003DMG402028027,PGSC0003DMG400004791,PGSC0003DMG400024095,PGSC0003DMG400027577,PGSC0003DMG400005247,PGSC0003DMG400024011,PGSC0003DMG400017714,PGSC0003DMG400028115,PGSC0003DMG401024510
GO:0045265	proton-transporting ATP synthase, stator stalk	0.04989801513776313	0.04989801513776313	PGSC0003DMG400006869,PGSC0003DMG400027374
GO:0000274	mitochondrial proton-transporting ATP synthase, stator stalk	0.04989801513776313	0.04989801513776313	PGSC0003DMG400006869,PGSC0003DMG400027374
KEGG
KEGG:00190	Oxidative phosphorylation	0.0004072974339176442	0.0004072974339176442	PGSC0003DMG400029087,PGSC0003DMG400024389,PGSC0003DMG400004999,PGSC0003DMG400024638,PGSC0003DMG400006869,PGSC0003DMG400009421,PGSC0003DMG401011206,PGSC0003DMG400027374,PGSC0003DMG400030628,PGSC0003DMG400003514,PGSC0003DMG400020224
KEGG:03050	Proteasome	0.0030377263657570303	0.0030377263657570303	PGSC0003DMG400019701,PGSC0003DMG400012259,PGSC0003DMG400028342,PGSC0003DMG402009395,PGSC0003DMG400030476,PGSC0003DMG400015761,PGSC0003DMG400006193
KEGG:00030	Pentose phosphate pathway	0.005712381513579411	0.005712381513579411	PGSC0003DMG400004791,PGSC0003DMG400018511,PGSC0003DMG400010007,PGSC0003DMG400001932,PGSC0003DMG400029309,PGSC0003DMG400007019

## Sheet: Down regulated
Supplemental table 2. List of all the GO terms associated with the regulated proteins.
GO analyses of down-regulated proteins
GOMF
GO.ID	Description	p.Val	FDR	Genes
GO:0003735	structural constituent of ribosome	2.75267e-35	2.75267e-35	PGSC0003DMG401005881,PGSC0003DMG400021189,PGSC0003DMG400007429,PGSC0003DMG400002597,PGSC0003DMG400031345,PGSC0003DMG400004124,PGSC0003DMG400030868,PGSC0003DMG400004838,PGSC0003DMG400020148,PGSC0003DMG400018180,PGSC0003DMG400005642,PGSC0003DMG400020566,PGSC0003DMG400025212,PGSC0003DMG400007336,PGSC0003DMG400026987,PGSC0003DMG400000286,PGSC0003DMG400014855,PGSC0003DMG400030052,PGSC0003DMG400001759,…
GO:0005198	structural molecule activity	1.31659e-31	1.31659e-31	PGSC0003DMG401005881,PGSC0003DMG400021189,PGSC0003DMG400007429,PGSC0003DMG400002597,PGSC0003DMG400031345,PGSC0003DMG400004124,PGSC0003DMG400030868,PGSC0003DMG400004838,PGSC0003DMG400008502,PGSC0003DMG400020148,PGSC0003DMG400018180,PGSC0003DMG400005642,PGSC0003DMG400020566,PGSC0003DMG400025212,PGSC0003DMG400007336,PGSC0003DMG400026987,PGSC0003DMG400000286,PGSC0003DMG400014855,PGSC0003DMG400030052,…
GO:0003723	RNA binding	0.0281445	0.0281445	PGSC0003DMG400009231,PGSC0003DMG401005881,PGSC0003DMG400030365,PGSC0003DMG400002765,PGSC0003DMG400020488,PGSC0003DMG400031345,PGSC0003DMG400019677,PGSC0003DMG400007830,PGSC0003DMG400020772,PGSC0003DMG400004124,PGSC0003DMG400030868,PGSC0003DMG400020148,PGSC0003DMG400020566,PGSC0003DMG400025212,PGSC0003DMG400026909,PGSC0003DMG400007336,PGSC0003DMG400030052,PGSC0003DMG400011315,PGSC0003DMG402028588,…
GO:0003676	nucleic acid binding	0.0007139520774260986	0.0007139520774260986	PGSC0003DMG400009231,PGSC0003DMG401005881,PGSC0003DMG400030365,PGSC0003DMG400002765,PGSC0003DMG400020488,PGSC0003DMG400031345,PGSC0003DMG400022707,PGSC0003DMG400019677,PGSC0003DMG400007830,PGSC0003DMG400020772,PGSC0003DMG400004124,PGSC0003DMG400030868,PGSC0003DMG400020148,PGSC0003DMG400020566,PGSC0003DMG400025212,PGSC0003DMG400026909,PGSC0003DMG400007336,PGSC0003DMG401031045,PGSC0003DMG400030052,…
GO:0019843	rRNA binding	0.002453752309810606	0.002453752309810606	PGSC0003DMG400025212,PGSC0003DMG400029266,PGSC0003DMG400006991,PGSC0003DMG400019215,PGSC0003DMG400009588,PGSC0003DMG400021170,PGSC0003DMG400023925,PGSC0003DMG400019272
GOBF
GO:0043604	amide biosynthetic process	4.28049e-31	4.28049e-31	PGSC0003DMG400009231,PGSC0003DMG401005881,PGSC0003DMG400007429,PGSC0003DMG400002597,PGSC0003DMG400022607,PGSC0003DMG400031345,PGSC0003DMG400019677,PGSC0003DMG400007830,PGSC0003DMG400020772,PGSC0003DMG400004124,PGSC0003DMG400030868,PGSC0003DMG400004838,PGSC0003DMG400020148,PGSC0003DMG400018180,PGSC0003DMG400005642,PGSC0003DMG400020566,PGSC0003DMG400025212,PGSC0003DMG400026909,PGSC0003DMG400007336,…
GO:0006412	translation	1.8589e-28	1.8589e-28	PGSC0003DMG400009231,PGSC0003DMG401005881,PGSC0003DMG400007429,PGSC0003DMG400002597,PGSC0003DMG400031345,PGSC0003DMG400019677,PGSC0003DMG400007830,PGSC0003DMG400020772,PGSC0003DMG400004124,PGSC0003DMG400030868,PGSC0003DMG400004838,PGSC0003DMG400020148,PGSC0003DMG400018180,PGSC0003DMG400005642,PGSC0003DMG400020566,PGSC0003DMG400025212,PGSC0003DMG400026909,PGSC0003DMG400007336,PGSC0003DMG400026987,…
GO:0043043	peptide biosynthetic process	3.23514e-29	3.23514e-29	PGSC0003DMG400009231,PGSC0003DMG401005881,PGSC0003DMG400007429,PGSC0003DMG400002597,PGSC0003DMG400031345,PGSC0003DMG400019677,PGSC0003DMG400007830,PGSC0003DMG400020772,PGSC0003DMG400004124,PGSC0003DMG400030868,PGSC0003DMG400004838,PGSC0003DMG400020148,PGSC0003DMG400018180,PGSC0003DMG400005642,PGSC0003DMG400020566,PGSC0003DMG400025212,PGSC0003DMG400026909,PGSC0003DMG400007336,PGSC0003DMG400026987,…
GO:0043603	cellular amide metabolic process	2.52501e-26	2.52501e-26	PGSC0003DMG400030613,PGSC0003DMG400009231,PGSC0003DMG401005881,PGSC0003DMG400007429,PGSC0003DMG400002597,PGSC0003DMG400022607,PGSC0003DMG400031345,PGSC0003DMG400019677,PGSC0003DMG400007830,PGSC0003DMG400020772,PGSC0003DMG400004124,PGSC0003DMG400030868,PGSC0003DMG400004838,PGSC0003DMG400020148,PGSC0003DMG400018180,PGSC0003DMG400005642,PGSC0003DMG400020566,PGSC0003DMG400025212,PGSC0003DMG400026909,…
GO:0006518	peptide metabolic process	9.06191e-27	9.06191e-27	PGSC0003DMG400030613,PGSC0003DMG400009231,PGSC0003DMG401005881,PGSC0003DMG400007429,PGSC0003DMG400002597,PGSC0003DMG400031345,PGSC0003DMG400019677,PGSC0003DMG400007830,PGSC0003DMG400020772,PGSC0003DMG400004124,PGSC0003DMG400030868,PGSC0003DMG400004838,PGSC0003DMG400020148,PGSC0003DMG400018180,PGSC0003DMG400005642,PGSC0003DMG400020566,PGSC0003DMG400025212,PGSC0003DMG400026909,PGSC0003DMG400007336,…
GO:1901566	organonitrogen compound biosynthetic process	5.08702e-18	5.08702e-18	PGSC0003DMG400025199,PGSC0003DMG400009231,PGSC0003DMG401005881,PGSC0003DMG400007429,PGSC0003DMG401011647,PGSC0003DMG400002597,PGSC0003DMG400022607,PGSC0003DMG400031345,PGSC0003DMG400019677,PGSC0003DMG400007830,PGSC0003DMG400020772,PGSC0003DMG400004124,PGSC0003DMG400030868,PGSC0003DMG400030812,PGSC0003DMG400011264,PGSC0003DMG400004838,PGSC0003DMG400020148,PGSC0003DMG400018180,PGSC0003DMG400005642,…
GO:0002181	cytoplasmic translation	46.9407	46.9407	PGSC0003DMG400009231,PGSC0003DMG400025212,PGSC0003DMG400011315,PGSC0003DMG400012101,PGSC0003DMG400029266,PGSC0003DMG400021812,PGSC0003DMG400021420,PGSC0003DMG400009063,PGSC0003DMG402027186,PGSC0003DMG400013270,PGSC0003DMG400027902,PGSC0003DMG400015795,PGSC0003DMG400035337,PGSC0003DMG400015245,PGSC0003DMG400008445,PGSC0003DMG400026983,PGSC0003DMG400019272
GO:1901564	organonitrogen compound metabolic process	62.176	62.176	PGSC0003DMG400018283,PGSC0003DMG400014388,PGSC0003DMG400012408,PGSC0003DMG400030613,PGSC0003DMG400025199,PGSC0003DMG400009231,PGSC0003DMG401005881,PGSC0003DMG400020107,PGSC0003DMG400008356,PGSC0003DMG400007429,PGSC0003DMG400004436,PGSC0003DMG400019698,PGSC0003DMG401001978,PGSC0003DMG400031224,PGSC0003DMG401011647,PGSC0003DMG400018104,PGSC0003DMG400002597,PGSC0003DMG401010423,PGSC0003DMG400030017,…
GO:0022613	ribonucleoprotein complex biogenesis	1842.84	1842.84	PGSC0003DMG400009231,PGSC0003DMG401005881,PGSC0003DMG400030365,PGSC0003DMG400007429,PGSC0003DMG400002765,PGSC0003DMG400004124,PGSC0003DMG400020148,PGSC0003DMG400005642,PGSC0003DMG400007336,PGSC0003DMG400030052,PGSC0003DMG400011315,PGSC0003DMG400012101,PGSC0003DMG400010119,PGSC0003DMG400010291,PGSC0003DMG400019215,PGSC0003DMG400031258,PGSC0003DMG400021420,PGSC0003DMG400009063,PGSC0003DMG400023925,…
GO:0044271	cellular nitrogen compound biosynthetic process	29271.4	29271.4	PGSC0003DMG400009231,PGSC0003DMG401005881,PGSC0003DMG400007429,PGSC0003DMG401011647,PGSC0003DMG400002597,PGSC0003DMG400022607,PGSC0003DMG400031345,PGSC0003DMG400019677,PGSC0003DMG400007830,PGSC0003DMG400020772,PGSC0003DMG400004124,PGSC0003DMG400030868,PGSC0003DMG400011264,PGSC0003DMG400004838,PGSC0003DMG400020148,PGSC0003DMG400018180,PGSC0003DMG400005642,PGSC0003DMG400020566,PGSC0003DMG400025212,…
GO:0042254	ribosome biogenesis	40239.1	40239.1	PGSC0003DMG401005881,PGSC0003DMG400030365,PGSC0003DMG400002765,PGSC0003DMG400004124,PGSC0003DMG400020148,PGSC0003DMG400005642,PGSC0003DMG400007336,PGSC0003DMG400030052,PGSC0003DMG400012101,PGSC0003DMG400010119,PGSC0003DMG400010291,PGSC0003DMG400019215,PGSC0003DMG400031258,PGSC0003DMG400021420,PGSC0003DMG400009063,PGSC0003DMG400023925,PGSC0003DMG402027186,PGSC0003DMG400013270,PGSC0003DMG400022511,…
GO:0044267	cellular protein metabolic process	4674.26	4674.26	PGSC0003DMG400012408,PGSC0003DMG400009231,PGSC0003DMG401005881,PGSC0003DMG400020107,PGSC0003DMG400007429,PGSC0003DMG400019698,PGSC0003DMG400031224,PGSC0003DMG400018104,PGSC0003DMG400002597,PGSC0003DMG401010423,PGSC0003DMG400030017,PGSC0003DMG400031345,PGSC0003DMG400010147,PGSC0003DMG400012003,PGSC0003DMG400019677,PGSC0003DMG400007830,PGSC0003DMG400020772,PGSC0003DMG400004124,PGSC0003DMG400030868,…
GO:0042273	ribosomal large subunit biogenesis	195182	195182	PGSC0003DMG401005881,PGSC0003DMG400020148,PGSC0003DMG400012101,PGSC0003DMG400010291,PGSC0003DMG400019215,PGSC0003DMG400021420,PGSC0003DMG400009063,PGSC0003DMG400023925,PGSC0003DMG402027186,PGSC0003DMG400013270,PGSC0003DMG400022511,PGSC0003DMG400035337,PGSC0003DMG400008445,PGSC0003DMG400023512,PGSC0003DMG400020813
GO:0019538	protein metabolic process	90061.9	90061.9	PGSC0003DMG400018283,PGSC0003DMG400012408,PGSC0003DMG400030613,PGSC0003DMG400009231,PGSC0003DMG401005881,PGSC0003DMG400020107,PGSC0003DMG400007429,PGSC0003DMG400019698,PGSC0003DMG400031224,PGSC0003DMG400018104,PGSC0003DMG400002597,PGSC0003DMG401010423,PGSC0003DMG400030017,PGSC0003DMG400031345,PGSC0003DMG400010147,PGSC0003DMG400012003,PGSC0003DMG400019677,PGSC0003DMG400007830,PGSC0003DMG400020772,…
GO:0010467	gene expression	3.29757e+06	3.29757e+06	PGSC0003DMG400009231,PGSC0003DMG401005881,PGSC0003DMG400030365,PGSC0003DMG400007429,PGSC0003DMG400002597,PGSC0003DMG401010423,PGSC0003DMG400031345,PGSC0003DMG400022707,PGSC0003DMG400019677,PGSC0003DMG400007830,PGSC0003DMG400020772,PGSC0003DMG400004124,PGSC0003DMG400030868,PGSC0003DMG400004838,PGSC0003DMG400020148,PGSC0003DMG400018180,PGSC0003DMG400005642,PGSC0003DMG400020566,PGSC0003DMG400025212,…
GO:0034645	cellular macromolecule biosynthetic process	7.64303e+07	7.64303e+07	PGSC0003DMG400009231,PGSC0003DMG401005881,PGSC0003DMG400007429,PGSC0003DMG400002597,PGSC0003DMG400031345,PGSC0003DMG400019677,PGSC0003DMG400007830,PGSC0003DMG400020772,PGSC0003DMG400004124,PGSC0003DMG400030868,PGSC0003DMG400004838,PGSC0003DMG400020148,PGSC0003DMG400018180,PGSC0003DMG400005642,PGSC0003DMG400020566,PGSC0003DMG400025212,PGSC0003DMG400026909,PGSC0003DMG400007336,PGSC0003DMG400026987,…
GO:0044085	cellular component biogenesis	9.45323e+07	9.45323e+07	PGSC0003DMG400028624,PGSC0003DMG400030426,PGSC0003DMG400009231,PGSC0003DMG401005881,PGSC0003DMG400030365,PGSC0003DMG400007429,PGSC0003DMG400002765,PGSC0003DMG400018557,PGSC0003DMG400000408,PGSC0003DMG400004124,PGSC0003DMG400008502,PGSC0003DMG400020148,PGSC0003DMG400005642,PGSC0003DMG400007336,PGSC0003DMG400030052,PGSC0003DMG400011315,PGSC0003DMG400012101,PGSC0003DMG400033056,PGSC0003DMG400023375,…
GO:0034641	cellular nitrogen compound metabolic process	1.22326e+09	1.22326e+09	PGSC0003DMG400030613,PGSC0003DMG400009231,PGSC0003DMG401005881,PGSC0003DMG400030365,PGSC0003DMG400007429,PGSC0003DMG400004436,PGSC0003DMG401001978,PGSC0003DMG401011647,PGSC0003DMG400002597,PGSC0003DMG400022607,PGSC0003DMG400031345,PGSC0003DMG400019677,PGSC0003DMG400007830,PGSC0003DMG400020772,PGSC0003DMG400004124,PGSC0003DMG400030868,PGSC0003DMG400011264,PGSC0003DMG400004838,PGSC0003DMG400020148,…
GO:0009059	macromolecule biosynthetic process	1.48196e+09	1.48196e+09	PGSC0003DMG400009231,PGSC0003DMG401005881,PGSC0003DMG400007429,PGSC0003DMG400002597,PGSC0003DMG400031345,PGSC0003DMG400019677,PGSC0003DMG400007830,PGSC0003DMG400020772,PGSC0003DMG400004124,PGSC0003DMG400030868,PGSC0003DMG400004838,PGSC0003DMG400020148,PGSC0003DMG400018180,PGSC0003DMG400005642,PGSC0003DMG400020566,PGSC0003DMG400025212,PGSC0003DMG400026909,PGSC0003DMG400007336,PGSC0003DMG400026987,…
GO:1901576	organic substance biosynthetic process	2.15887e+09	2.15887e+09	PGSC0003DMG400025199,PGSC0003DMG400009231,PGSC0003DMG401005881,PGSC0003DMG400007429,PGSC0003DMG400004436,PGSC0003DMG401011647,PGSC0003DMG400002597,PGSC0003DMG400022088,PGSC0003DMG400022607,PGSC0003DMG400031345,PGSC0003DMG400019677,PGSC0003DMG400007830,PGSC0003DMG400020772,PGSC0003DMG400004124,PGSC0003DMG400030868,PGSC0003DMG400030812,PGSC0003DMG400011264,PGSC0003DMG400004838,PGSC0003DMG400020148,…
GO:0044249	cellular biosynthetic process	4.10951e+08	4.10951e+08	PGSC0003DMG400025199,PGSC0003DMG400009231,PGSC0003DMG401005881,PGSC0003DMG400007429,PGSC0003DMG400004436,PGSC0003DMG401011647,PGSC0003DMG400002597,PGSC0003DMG400022607,PGSC0003DMG400031345,PGSC0003DMG400019677,PGSC0003DMG400007830,PGSC0003DMG400020772,PGSC0003DMG400004124,PGSC0003DMG400030868,PGSC0003DMG400030812,PGSC0003DMG400011264,PGSC0003DMG400004838,PGSC0003DMG400020148,PGSC0003DMG400018180,…
GO:0009058	biosynthetic process	0.0000017294175685583378	0.0000017294175685583378	PGSC0003DMG400025199,PGSC0003DMG400009231,PGSC0003DMG401005881,PGSC0003DMG400007429,PGSC0003DMG400004436,PGSC0003DMG401011647,PGSC0003DMG400002597,PGSC0003DMG400022088,PGSC0003DMG400022607,PGSC0003DMG400031345,PGSC0003DMG400019677,PGSC0003DMG400007830,PGSC0003DMG400020772,PGSC0003DMG400004124,PGSC0003DMG400030868,PGSC0003DMG400030812,PGSC0003DMG400011264,PGSC0003DMG400004838,PGSC0003DMG400020148,…
GO:0008152	metabolic process	0.00020876181323616405	0.00020876181323616405	PGSC0003DMG400031765,PGSC0003DMG400018283,PGSC0003DMG400020269,PGSC0003DMG401001731,PGSC0003DMG400014388,PGSC0003DMG400012395,PGSC0003DMG400012408,PGSC0003DMG400030613,PGSC0003DMG400002601,PGSC0003DMG400025199,PGSC0003DMG400009231,PGSC0003DMG401005881,PGSC0003DMG400030365,PGSC0003DMG400020107,PGSC0003DMG400008356,PGSC0003DMG401012699,PGSC0003DMG402025083,PGSC0003DMG400025299,PGSC0003DMG400007429,…
GO:0044237	cellular metabolic process	0.0018666440163688791	0.0018666440163688791	PGSC0003DMG400031765,PGSC0003DMG400020269,PGSC0003DMG401001731,PGSC0003DMG400012395,PGSC0003DMG400012408,PGSC0003DMG400030613,PGSC0003DMG400002601,PGSC0003DMG400025199,PGSC0003DMG400009231,PGSC0003DMG401005881,PGSC0003DMG400030365,PGSC0003DMG400020107,PGSC0003DMG400008356,PGSC0003DMG401012699,PGSC0003DMG402025083,PGSC0003DMG400007429,PGSC0003DMG400004436,PGSC0003DMG400019698,PGSC0003DMG401001978,…
GO:0043933	protein-containing complex subunit organization	0.0026513603458910534	0.0026513603458910534	PGSC0003DMG400028624,PGSC0003DMG400030426,PGSC0003DMG400009231,PGSC0003DMG400007429,PGSC0003DMG400018104,PGSC0003DMG400018557,PGSC0003DMG400012003,PGSC0003DMG400007830,PGSC0003DMG400008502,PGSC0003DMG400007336,PGSC0003DMG400017893,PGSC0003DMG400011315,PGSC0003DMG400023375,PGSC0003DMG400030339,PGSC0003DMG400019215,PGSC0003DMG400023925,PGSC0003DMG400013270,PGSC0003DMG400008445,PGSC0003DMG400001128
GO:0000302	response to reactive oxygen species	0.004698112178092741	0.004698112178092741	PGSC0003DMG401001731,PGSC0003DMG400028624,PGSC0003DMG400030426,PGSC0003DMG400000417,PGSC0003DMG400029408,PGSC0003DMG400009906,PGSC0003DMG400030339
GO:0071704	organic substance metabolic process	0.007024782183786342	0.007024782183786342	PGSC0003DMG400031765,PGSC0003DMG400018283,PGSC0003DMG400020269,PGSC0003DMG400014388,PGSC0003DMG400012395,PGSC0003DMG400012408,PGSC0003DMG400030613,PGSC0003DMG400025199,PGSC0003DMG400009231,PGSC0003DMG401005881,PGSC0003DMG400030365,PGSC0003DMG400020107,PGSC0003DMG400008356,PGSC0003DMG401012699,PGSC0003DMG400025299,PGSC0003DMG400007429,PGSC0003DMG400004436,PGSC0003DMG400019698,PGSC0003DMG401001978,…
GO:0009987	cellular process	0.012013250206917219	0.012013250206917219	PGSC0003DMG400031765,PGSC0003DMG400020269,PGSC0003DMG401001731,PGSC0003DMG400028624,PGSC0003DMG400012395,PGSC0003DMG400012408,PGSC0003DMG400030613,PGSC0003DMG400002601,PGSC0003DMG400030426,PGSC0003DMG400025199,PGSC0003DMG400009231,PGSC0003DMG401005881,PGSC0003DMG400030365,PGSC0003DMG400020107,PGSC0003DMG400008356,PGSC0003DMG401000859,PGSC0003DMG401012699,PGSC0003DMG402025083,PGSC0003DMG400007429,…
GO:0022618	ribonucleoprotein complex assembly	0.015125985750639188	0.015125985750639188	PGSC0003DMG400009231,PGSC0003DMG400007429,PGSC0003DMG400007336,PGSC0003DMG400011315,PGSC0003DMG400019215,PGSC0003DMG400023925,PGSC0003DMG400013270,PGSC0003DMG400008445,PGSC0003DMG400001128
GO:0071826	ribonucleoprotein complex subunit organization	0.018292159953717236	0.018292159953717236	PGSC0003DMG400009231,PGSC0003DMG400007429,PGSC0003DMG400007336,PGSC0003DMG400011315,PGSC0003DMG400019215,PGSC0003DMG400023925,PGSC0003DMG400013270,PGSC0003DMG400008445,PGSC0003DMG400001128
GO:0006807	nitrogen compound metabolic process	0.02157791027285174	0.02157791027285174	PGSC0003DMG400018283,PGSC0003DMG400014388,PGSC0003DMG400012408,PGSC0003DMG400030613,PGSC0003DMG400025199,PGSC0003DMG400009231,PGSC0003DMG401005881,PGSC0003DMG400030365,PGSC0003DMG400020107,PGSC0003DMG400008356,PGSC0003DMG400007429,PGSC0003DMG400004436,PGSC0003DMG400019698,PGSC0003DMG401001978,PGSC0003DMG400031224,PGSC0003DMG401011647,PGSC0003DMG400018104,PGSC0003DMG400002597,PGSC0003DMG401010423,…
GO:0042542	response to hydrogen peroxide	0.02592579888874584	0.02592579888874584	PGSC0003DMG400028624,PGSC0003DMG400030426,PGSC0003DMG400029408,PGSC0003DMG400009906,PGSC0003DMG400030339
GO:0071840	cellular component organization or biogenesis	0.02615696409829743	0.02615696409829743	PGSC0003DMG400028624,PGSC0003DMG400030426,PGSC0003DMG400009231,PGSC0003DMG401005881,PGSC0003DMG400030365,PGSC0003DMG400007429,PGSC0003DMG400002765,PGSC0003DMG400018104,PGSC0003DMG400018557,PGSC0003DMG400000408,PGSC0003DMG400012003,PGSC0003DMG400007830,PGSC0003DMG400004124,PGSC0003DMG400008502,PGSC0003DMG400020148,PGSC0003DMG400005642,PGSC0003DMG400007336,PGSC0003DMG400017893,PGSC0003DMG400030052,…
GO:0044238	primary metabolic process	0.030377743440762894	0.030377743440762894	PGSC0003DMG400031765,PGSC0003DMG400018283,PGSC0003DMG400020269,PGSC0003DMG400012395,PGSC0003DMG400012408,PGSC0003DMG400030613,PGSC0003DMG400025199,PGSC0003DMG400009231,PGSC0003DMG401005881,PGSC0003DMG400030365,PGSC0003DMG400020107,PGSC0003DMG400008356,PGSC0003DMG400025299,PGSC0003DMG400007429,PGSC0003DMG400004436,PGSC0003DMG400019698,PGSC0003DMG401001978,PGSC0003DMG400031224,PGSC0003DMG401031759,…
GO:0042255	ribosome assembly	0.03471809074925934	0.03471809074925934	PGSC0003DMG400007336,PGSC0003DMG400019215,PGSC0003DMG400023925,PGSC0003DMG400013270,PGSC0003DMG400008445,PGSC0003DMG400001128
GO CC
GO:0022626	cytosolic ribosome	6.36487e-45	6.36487e-45	PGSC0003DMG401005881,PGSC0003DMG400021189,PGSC0003DMG400007429,PGSC0003DMG400002597,PGSC0003DMG400004124,PGSC0003DMG400030868,PGSC0003DMG400004838,PGSC0003DMG400020148,PGSC0003DMG400018180,PGSC0003DMG400005642,PGSC0003DMG400020566,PGSC0003DMG400025212,PGSC0003DMG400007336,PGSC0003DMG400026987,PGSC0003DMG400000286,PGSC0003DMG400030052,PGSC0003DMG400001759,PGSC0003DMG400012101,PGSC0003DMG400029266,…
GO:0044391	ribosomal subunit	8.50798e-41	8.50798e-41	PGSC0003DMG401005881,PGSC0003DMG400021189,PGSC0003DMG400007429,PGSC0003DMG400002597,PGSC0003DMG400031345,PGSC0003DMG400004124,PGSC0003DMG400030868,PGSC0003DMG400004838,PGSC0003DMG400020148,PGSC0003DMG400018180,PGSC0003DMG400005642,PGSC0003DMG400020566,PGSC0003DMG400025212,PGSC0003DMG400007336,PGSC0003DMG400026987,PGSC0003DMG400000286,PGSC0003DMG400030052,PGSC0003DMG400001759,PGSC0003DMG400012101,…
GO:0005840	ribosome	2.0956e-35	2.0956e-35	PGSC0003DMG401005881,PGSC0003DMG400021189,PGSC0003DMG400007429,PGSC0003DMG400002597,PGSC0003DMG400031345,PGSC0003DMG400004124,PGSC0003DMG400030868,PGSC0003DMG400004838,PGSC0003DMG400020148,PGSC0003DMG400018180,PGSC0003DMG400005642,PGSC0003DMG400020566,PGSC0003DMG400025212,PGSC0003DMG400007336,PGSC0003DMG400026987,PGSC0003DMG400000286,PGSC0003DMG400014855,PGSC0003DMG400030052,PGSC0003DMG400001759,…
GO:0022625	cytosolic large ribosomal subunit	7.51115e-27	7.51115e-27	PGSC0003DMG401005881,PGSC0003DMG400007429,PGSC0003DMG400002597,PGSC0003DMG400030868,PGSC0003DMG400004838,PGSC0003DMG400020148,PGSC0003DMG400018180,PGSC0003DMG400025212,PGSC0003DMG400026987,PGSC0003DMG400012101,PGSC0003DMG400029266,PGSC0003DMG400010291,PGSC0003DMG400019215,PGSC0003DMG400024723,PGSC0003DMG400007707,PGSC0003DMG400031258,PGSC0003DMG402015759,PGSC0003DMG400013598,PGSC0003DMG400011741,…
GO:1990904	ribonucleoprotein complex	4.5259e-26	4.5259e-26	PGSC0003DMG400009231,PGSC0003DMG401005881,PGSC0003DMG400021189,PGSC0003DMG400007429,PGSC0003DMG400002765,PGSC0003DMG400002597,PGSC0003DMG400031345,PGSC0003DMG400004124,PGSC0003DMG400030868,PGSC0003DMG400004838,PGSC0003DMG400020148,PGSC0003DMG400018180,PGSC0003DMG400005642,PGSC0003DMG400020566,PGSC0003DMG400025212,PGSC0003DMG400007336,PGSC0003DMG400026987,PGSC0003DMG400000286,PGSC0003DMG400030052,…
GO:0005829	cytosol	1.85125e-23	1.85125e-23	PGSC0003DMG400014388,PGSC0003DMG400012408,PGSC0003DMG401005881,PGSC0003DMG401012699,PGSC0003DMG400021189,PGSC0003DMG400007429,PGSC0003DMG400004436,PGSC0003DMG400018104,PGSC0003DMG400002597,PGSC0003DMG400022088,PGSC0003DMG400031345,PGSC0003DMG400012003,PGSC0003DMG400004124,PGSC0003DMG400030868,PGSC0003DMG400004838,PGSC0003DMG400020148,PGSC0003DMG400018180,PGSC0003DMG400005642,PGSC0003DMG400020566,…
GO:0015934	large ribosomal subunit	5.7968e-23	5.7968e-23	PGSC0003DMG401005881,PGSC0003DMG400007429,PGSC0003DMG400002597,PGSC0003DMG400030868,PGSC0003DMG400004838,PGSC0003DMG400020148,PGSC0003DMG400018180,PGSC0003DMG400025212,PGSC0003DMG400026987,PGSC0003DMG400012101,PGSC0003DMG400029266,PGSC0003DMG400010291,PGSC0003DMG400019215,PGSC0003DMG400024723,PGSC0003DMG400007707,PGSC0003DMG400031258,PGSC0003DMG402015759,PGSC0003DMG400013598,PGSC0003DMG400011741,…
GO:0043228	non-membrane-bounded organelle	1.01213e-14	1.01213e-14	PGSC0003DMG401005881,PGSC0003DMG400021189,PGSC0003DMG400007429,PGSC0003DMG400002765,PGSC0003DMG400010304,PGSC0003DMG400002597,PGSC0003DMG400018557,PGSC0003DMG400031345,PGSC0003DMG400004124,PGSC0003DMG400030868,PGSC0003DMG400004838,PGSC0003DMG400020148,PGSC0003DMG400018180,PGSC0003DMG400005642,PGSC0003DMG400020566,PGSC0003DMG400025212,PGSC0003DMG400007336,PGSC0003DMG400026987,PGSC0003DMG400000286,…
GO:0043232	intracellular non-membrane-bounded organelle	1.01213e-14	1.01213e-14	PGSC0003DMG401005881,PGSC0003DMG400021189,PGSC0003DMG400007429,PGSC0003DMG400002765,PGSC0003DMG400010304,PGSC0003DMG400002597,PGSC0003DMG400018557,PGSC0003DMG400031345,PGSC0003DMG400004124,PGSC0003DMG400030868,PGSC0003DMG400004838,PGSC0003DMG400020148,PGSC0003DMG400018180,PGSC0003DMG400005642,PGSC0003DMG400020566,PGSC0003DMG400025212,PGSC0003DMG400007336,PGSC0003DMG400026987,PGSC0003DMG400000286,…
GO:0005737	cytoplasm	4.1643e-07	4.1643e-07	PGSC0003DMG400031765,PGSC0003DMG400020269,PGSC0003DMG401001731,PGSC0003DMG400008824,PGSC0003DMG400028624,PGSC0003DMG400014388,PGSC0003DMG400012395,PGSC0003DMG400012408,PGSC0003DMG400002601,PGSC0003DMG400030426,PGSC0003DMG400025199,PGSC0003DMG400009231,PGSC0003DMG401005881,PGSC0003DMG400020107,PGSC0003DMG400028641,PGSC0003DMG400008356,PGSC0003DMG401000859,PGSC0003DMG401012699,PGSC0003DMG400021189,…
GO:0032991	protein-containing complex	8.63611e-09	8.63611e-09	PGSC0003DMG400009231,PGSC0003DMG401005881,PGSC0003DMG400021189,PGSC0003DMG400007429,PGSC0003DMG400002765,PGSC0003DMG400010304,PGSC0003DMG400031224,PGSC0003DMG401011647,PGSC0003DMG400018104,PGSC0003DMG400002597,PGSC0003DMG401010423,PGSC0003DMG400030017,PGSC0003DMG400022607,PGSC0003DMG400031345,PGSC0003DMG400012003,PGSC0003DMG400004124,PGSC0003DMG400030868,PGSC0003DMG400023519,PGSC0003DMG400025645,…
GO:0022627	cytosolic small ribosomal subunit	2.26064	2.26064	PGSC0003DMG400021189,PGSC0003DMG400004124,PGSC0003DMG400005642,PGSC0003DMG400020566,PGSC0003DMG400007336,PGSC0003DMG400000286,PGSC0003DMG400030052,PGSC0003DMG400001759,PGSC0003DMG400006991,PGSC0003DMG400024838,PGSC0003DMG400009588,PGSC0003DMG400027045,PGSC0003DMG400033684,PGSC0003DMG400021170,PGSC0003DMG400007685,PGSC0003DMG401005911,PGSC0003DMG400001128
GO:0015935	small ribosomal subunit	28.9449	28.9449	PGSC0003DMG400021189,PGSC0003DMG400031345,PGSC0003DMG400004124,PGSC0003DMG400005642,PGSC0003DMG400020566,PGSC0003DMG400007336,PGSC0003DMG400000286,PGSC0003DMG400030052,PGSC0003DMG400001759,PGSC0003DMG400006991,PGSC0003DMG400024838,PGSC0003DMG400009588,PGSC0003DMG400027045,PGSC0003DMG400033684,PGSC0003DMG400021170,PGSC0003DMG400007685,PGSC0003DMG401005911,PGSC0003DMG400001128
GO:0005622	intracellular anatomical structure	6112.68	6112.68	PGSC0003DMG400031765,PGSC0003DMG400020269,PGSC0003DMG401001731,PGSC0003DMG400008824,PGSC0003DMG400028624,PGSC0003DMG400014388,PGSC0003DMG400012395,PGSC0003DMG400012408,PGSC0003DMG400002601,PGSC0003DMG400030426,PGSC0003DMG400025199,PGSC0003DMG400009231,PGSC0003DMG401005881,PGSC0003DMG400030365,PGSC0003DMG400020107,PGSC0003DMG400028641,PGSC0003DMG400008356,PGSC0003DMG401000859,PGSC0003DMG401012699,…
GO:0043229	intracellular organelle	0.000010145096795881476	0.000010145096795881476	PGSC0003DMG401001731,PGSC0003DMG400008824,PGSC0003DMG400014388,PGSC0003DMG400012395,PGSC0003DMG400012408,PGSC0003DMG400002601,PGSC0003DMG400025199,PGSC0003DMG401005881,PGSC0003DMG400030365,PGSC0003DMG400028641,PGSC0003DMG400008356,PGSC0003DMG401000859,PGSC0003DMG400021189,PGSC0003DMG400007429,PGSC0003DMG400002765,PGSC0003DMG401001978,PGSC0003DMG400010304,PGSC0003DMG400020488,PGSC0003DMG400031224,…
GO:0043226	organelle	0.000011048547786320864	0.000011048547786320864	PGSC0003DMG401001731,PGSC0003DMG400008824,PGSC0003DMG400014388,PGSC0003DMG400012395,PGSC0003DMG400012408,PGSC0003DMG400002601,PGSC0003DMG400025199,PGSC0003DMG401005881,PGSC0003DMG400030365,PGSC0003DMG400028641,PGSC0003DMG400008356,PGSC0003DMG401000859,PGSC0003DMG400021189,PGSC0003DMG400007429,PGSC0003DMG400002765,PGSC0003DMG401001978,PGSC0003DMG400010304,PGSC0003DMG400020488,PGSC0003DMG400031224,…
GO:0034098	VCP-NPL4-UFD1 AAA ATPase complex	0.005387442949823699	0.005387442949823699	PGSC0003DMG400018104,PGSC0003DMG400012003,PGSC0003DMG402005570
KEGG
KEGG:03010	Ribosome	5.05727e-17	5.05727e-17	PGSC0003DMG401005881,PGSC0003DMG400021189,PGSC0003DMG400007429,PGSC0003DMG400031345,PGSC0003DMG400004124,PGSC0003DMG400030868,PGSC0003DMG400004838,PGSC0003DMG400020148,PGSC0003DMG400018180,PGSC0003DMG400005642,PGSC0003DMG400020566,PGSC0003DMG400025212,PGSC0003DMG400007336,PGSC0003DMG400026987,PGSC0003DMG400014855,PGSC0003DMG400030052,PGSC0003DMG400012101,PGSC0003DMG400010291,PGSC0003DMG400004686,…

## Sheet: Hoja1
GO.ID	Description	p.Val	FDR	Phenotype	Genes
GO:0003735	structural constituent of ribosome	2.75267e-35	2.75267e-35	1	PGSC0003DMG401005881,PGSC0003DMG400021189,PGSC0003DMG400007429,PGSC0003DMG400002597,PGSC0003DMG400031345,PGSC0003DMG400004124,PGSC0003DMG400030868,PGSC0003DMG400004838,PGSC0003DMG400020148,PGSC0003DMG400018180,PGSC0003DMG400005642,PGSC0003DMG400020566,PGSC0003DMG400025212,PGSC0003DMG400007336,PGSC0003DMG400026987,PGSC0003DMG400000286,PGSC0003DMG400014855,PGSC0003DMG400030052,PGSC0003DMG400001759,…
GO:0005198	structural molecule activity	1.31659e-31	1.31659e-31	1	PGSC0003DMG401005881,PGSC0003DMG400021189,PGSC0003DMG400007429,PGSC0003DMG400002597,PGSC0003DMG400031345,PGSC0003DMG400004124,PGSC0003DMG400030868,PGSC0003DMG400004838,PGSC0003DMG400008502,PGSC0003DMG400020148,PGSC0003DMG400018180,PGSC0003DMG400005642,PGSC0003DMG400020566,PGSC0003DMG400025212,PGSC0003DMG400007336,PGSC0003DMG400026987,PGSC0003DMG400000286,PGSC0003DMG400014855,PGSC0003DMG400030052,…
GO:0003723	RNA binding	0.0281445	0.0281445	1	PGSC0003DMG400009231,PGSC0003DMG401005881,PGSC0003DMG400030365,PGSC0003DMG400002765,PGSC0003DMG400020488,PGSC0003DMG400031345,PGSC0003DMG400019677,PGSC0003DMG400007830,PGSC0003DMG400020772,PGSC0003DMG400004124,PGSC0003DMG400030868,PGSC0003DMG400020148,PGSC0003DMG400020566,PGSC0003DMG400025212,PGSC0003DMG400026909,PGSC0003DMG400007336,PGSC0003DMG400030052,PGSC0003DMG400011315,PGSC0003DMG402028588,…
GO:0003676	nucleic acid binding	0.0007139520774260986	0.0007139520774260986	1	PGSC0003DMG400009231,PGSC0003DMG401005881,PGSC0003DMG400030365,PGSC0003DMG400002765,PGSC0003DMG400020488,PGSC0003DMG400031345,PGSC0003DMG400022707,PGSC0003DMG400019677,PGSC0003DMG400007830,PGSC0003DMG400020772,PGSC0003DMG400004124,PGSC0003DMG400030868,PGSC0003DMG400020148,PGSC0003DMG400020566,PGSC0003DMG400025212,PGSC0003DMG400026909,PGSC0003DMG400007336,PGSC0003DMG401031045,PGSC0003DMG400030052,…
GO:0019843	rRNA binding	0.002453752309810606	0.002453752309810606	1	PGSC0003DMG400025212,PGSC0003DMG400029266,PGSC0003DMG400006991,PGSC0003DMG400019215,PGSC0003DMG400009588,PGSC0003DMG400021170,PGSC0003DMG400023925,PGSC0003DMG400019272
GO:0043604	amide biosynthetic process	4.28049e-31	4.28049e-31	1	PGSC0003DMG400009231,PGSC0003DMG401005881,PGSC0003DMG400007429,PGSC0003DMG400002597,PGSC0003DMG400022607,PGSC0003DMG400031345,PGSC0003DMG400019677,PGSC0003DMG400007830,PGSC0003DMG400020772,PGSC0003DMG400004124,PGSC0003DMG400030868,PGSC0003DMG400004838,PGSC0003DMG400020148,PGSC0003DMG400018180,PGSC0003DMG400005642,PGSC0003DMG400020566,PGSC0003DMG400025212,PGSC0003DMG400026909,PGSC0003DMG400007336,…
GO:0006412	translation	1.8589e-28	1.8589e-28	1	PGSC0003DMG400009231,PGSC0003DMG401005881,PGSC0003DMG400007429,PGSC0003DMG400002597,PGSC0003DMG400031345,PGSC0003DMG400019677,PGSC0003DMG400007830,PGSC0003DMG400020772,PGSC0003DMG400004124,PGSC0003DMG400030868,PGSC0003DMG400004838,PGSC0003DMG400020148,PGSC0003DMG400018180,PGSC0003DMG400005642,PGSC0003DMG400020566,PGSC0003DMG400025212,PGSC0003DMG400026909,PGSC0003DMG400007336,PGSC0003DMG400026987,…
GO:0043043	peptide biosynthetic process	3.23514e-29	3.23514e-29	1	PGSC0003DMG400009231,PGSC0003DMG401005881,PGSC0003DMG400007429,PGSC0003DMG400002597,PGSC0003DMG400031345,PGSC0003DMG400019677,PGSC0003DMG400007830,PGSC0003DMG400020772,PGSC0003DMG400004124,PGSC0003DMG400030868,PGSC0003DMG400004838,PGSC0003DMG400020148,PGSC0003DMG400018180,PGSC0003DMG400005642,PGSC0003DMG400020566,PGSC0003DMG400025212,PGSC0003DMG400026909,PGSC0003DMG400007336,PGSC0003DMG400026987,…
GO:0043603	cellular amide metabolic process	2.52501e-26	2.52501e-26	1	PGSC0003DMG400030613,PGSC0003DMG400009231,PGSC0003DMG401005881,PGSC0003DMG400007429,PGSC0003DMG400002597,PGSC0003DMG400022607,PGSC0003DMG400031345,PGSC0003DMG400019677,PGSC0003DMG400007830,PGSC0003DMG400020772,PGSC0003DMG400004124,PGSC0003DMG400030868,PGSC0003DMG400004838,PGSC0003DMG400020148,PGSC0003DMG400018180,PGSC0003DMG400005642,PGSC0003DMG400020566,PGSC0003DMG400025212,PGSC0003DMG400026909,…
GO:0006518	peptide metabolic process	9.06191e-27	9.06191e-27	1	PGSC0003DMG400030613,PGSC0003DMG400009231,PGSC0003DMG401005881,PGSC0003DMG400007429,PGSC0003DMG400002597,PGSC0003DMG400031345,PGSC0003DMG400019677,PGSC0003DMG400007830,PGSC0003DMG400020772,PGSC0003DMG400004124,PGSC0003DMG400030868,PGSC0003DMG400004838,PGSC0003DMG400020148,PGSC0003DMG400018180,PGSC0003DMG400005642,PGSC0003DMG400020566,PGSC0003DMG400025212,PGSC0003DMG400026909,PGSC0003DMG400007336,…
GO:1901566	organonitrogen compound biosynthetic process	5.08702e-18	5.08702e-18	1	PGSC0003DMG400025199,PGSC0003DMG400009231,PGSC0003DMG401005881,PGSC0003DMG400007429,PGSC0003DMG401011647,PGSC0003DMG400002597,PGSC0003DMG400022607,PGSC0003DMG400031345,PGSC0003DMG400019677,PGSC0003DMG400007830,PGSC0003DMG400020772,PGSC0003DMG400004124,PGSC0003DMG400030868,PGSC0003DMG400030812,PGSC0003DMG400011264,PGSC0003DMG400004838,PGSC0003DMG400020148,PGSC0003DMG400018180,PGSC0003DMG400005642,…
GO:0002181	cytoplasmic translation	46.9407	46.9407	1	PGSC0003DMG400009231,PGSC0003DMG400025212,PGSC0003DMG400011315,PGSC0003DMG400012101,PGSC0003DMG400029266,PGSC0003DMG400021812,PGSC0003DMG400021420,PGSC0003DMG400009063,PGSC0003DMG402027186,PGSC0003DMG400013270,PGSC0003DMG400027902,PGSC0003DMG400015795,PGSC0003DMG400035337,PGSC0003DMG400015245,PGSC0003DMG400008445,PGSC0003DMG400026983,PGSC0003DMG400019272
GO:1901564	organonitrogen compound metabolic process	62.176	62.176	1	PGSC0003DMG400018283,PGSC0003DMG400014388,PGSC0003DMG400012408,PGSC0003DMG400030613,PGSC0003DMG400025199,PGSC0003DMG400009231,PGSC0003DMG401005881,PGSC0003DMG400020107,PGSC0003DMG400008356,PGSC0003DMG400007429,PGSC0003DMG400004436,PGSC0003DMG400019698,PGSC0003DMG401001978,PGSC0003DMG400031224,PGSC0003DMG401011647,PGSC0003DMG400018104,PGSC0003DMG400002597,PGSC0003DMG401010423,PGSC0003DMG400030017,…
GO:0022613	ribonucleoprotein complex biogenesis	1842.84	1842.84	1	PGSC0003DMG400009231,PGSC0003DMG401005881,PGSC0003DMG400030365,PGSC0003DMG400007429,PGSC0003DMG400002765,PGSC0003DMG400004124,PGSC0003DMG400020148,PGSC0003DMG400005642,PGSC0003DMG400007336,PGSC0003DMG400030052,PGSC0003DMG400011315,PGSC0003DMG400012101,PGSC0003DMG400010119,PGSC0003DMG400010291,PGSC0003DMG400019215,PGSC0003DMG400031258,PGSC0003DMG400021420,PGSC0003DMG400009063,PGSC0003DMG400023925,…
GO:0044271	cellular nitrogen compound biosynthetic process	29271.4	29271.4	1	PGSC0003DMG400009231,PGSC0003DMG401005881,PGSC0003DMG400007429,PGSC0003DMG401011647,PGSC0003DMG400002597,PGSC0003DMG400022607,PGSC0003DMG400031345,PGSC0003DMG400019677,PGSC0003DMG400007830,PGSC0003DMG400020772,PGSC0003DMG400004124,PGSC0003DMG400030868,PGSC0003DMG400011264,PGSC0003DMG400004838,PGSC0003DMG400020148,PGSC0003DMG400018180,PGSC0003DMG400005642,PGSC0003DMG400020566,PGSC0003DMG400025212,…
GO:0042254	ribosome biogenesis	40239.1	40239.1	1	PGSC0003DMG401005881,PGSC0003DMG400030365,PGSC0003DMG400002765,PGSC0003DMG400004124,PGSC0003DMG400020148,PGSC0003DMG400005642,PGSC0003DMG400007336,PGSC0003DMG400030052,PGSC0003DMG400012101,PGSC0003DMG400010119,PGSC0003DMG400010291,PGSC0003DMG400019215,PGSC0003DMG400031258,PGSC0003DMG400021420,PGSC0003DMG400009063,PGSC0003DMG400023925,PGSC0003DMG402027186,PGSC0003DMG400013270,PGSC0003DMG400022511,…
GO:0044267	cellular protein metabolic process	4674.26	4674.26	1	PGSC0003DMG400012408,PGSC0003DMG400009231,PGSC0003DMG401005881,PGSC0003DMG400020107,PGSC0003DMG400007429,PGSC0003DMG400019698,PGSC0003DMG400031224,PGSC0003DMG400018104,PGSC0003DMG400002597,PGSC0003DMG401010423,PGSC0003DMG400030017,PGSC0003DMG400031345,PGSC0003DMG400010147,PGSC0003DMG400012003,PGSC0003DMG400019677,PGSC0003DMG400007830,PGSC0003DMG400020772,PGSC0003DMG400004124,PGSC0003DMG400030868,…
GO:0042273	ribosomal large subunit biogenesis	195182	195182	1	PGSC0003DMG401005881,PGSC0003DMG400020148,PGSC0003DMG400012101,PGSC0003DMG400010291,PGSC0003DMG400019215,PGSC0003DMG400021420,PGSC0003DMG400009063,PGSC0003DMG400023925,PGSC0003DMG402027186,PGSC0003DMG400013270,PGSC0003DMG400022511,PGSC0003DMG400035337,PGSC0003DMG400008445,PGSC0003DMG400023512,PGSC0003DMG400020813
GO:0019538	protein metabolic process	90061.9	90061.9	1	PGSC0003DMG400018283,PGSC0003DMG400012408,PGSC0003DMG400030613,PGSC0003DMG400009231,PGSC0003DMG401005881,PGSC0003DMG400020107,PGSC0003DMG400007429,PGSC0003DMG400019698,PGSC0003DMG400031224,PGSC0003DMG400018104,PGSC0003DMG400002597,PGSC0003DMG401010423,PGSC0003DMG400030017,PGSC0003DMG400031345,PGSC0003DMG400010147,PGSC0003DMG400012003,PGSC0003DMG400019677,PGSC0003DMG400007830,PGSC0003DMG400020772,…
GO:0010467	gene expression	3.29757e+06	3.29757e+06	1	PGSC0003DMG400009231,PGSC0003DMG401005881,PGSC0003DMG400030365,PGSC0003DMG400007429,PGSC0003DMG400002597,PGSC0003DMG401010423,PGSC0003DMG400031345,PGSC0003DMG400022707,PGSC0003DMG400019677,PGSC0003DMG400007830,PGSC0003DMG400020772,PGSC0003DMG400004124,PGSC0003DMG400030868,PGSC0003DMG400004838,PGSC0003DMG400020148,PGSC0003DMG400018180,PGSC0003DMG400005642,PGSC0003DMG400020566,PGSC0003DMG400025212,…
GO:0034645	cellular macromolecule biosynthetic process	7.64303e+07	7.64303e+07	1	PGSC0003DMG400009231,PGSC0003DMG401005881,PGSC0003DMG400007429,PGSC0003DMG400002597,PGSC0003DMG400031345,PGSC0003DMG400019677,PGSC0003DMG400007830,PGSC0003DMG400020772,PGSC0003DMG400004124,PGSC0003DMG400030868,PGSC0003DMG400004838,PGSC0003DMG400020148,PGSC0003DMG400018180,PGSC0003DMG400005642,PGSC0003DMG400020566,PGSC0003DMG400025212,PGSC0003DMG400026909,PGSC0003DMG400007336,PGSC0003DMG400026987,…
GO:0044085	cellular component biogenesis	9.45323e+07	9.45323e+07	1	PGSC0003DMG400028624,PGSC0003DMG400030426,PGSC0003DMG400009231,PGSC0003DMG401005881,PGSC0003DMG400030365,PGSC0003DMG400007429,PGSC0003DMG400002765,PGSC0003DMG400018557,PGSC0003DMG400000408,PGSC0003DMG400004124,PGSC0003DMG400008502,PGSC0003DMG400020148,PGSC0003DMG400005642,PGSC0003DMG400007336,PGSC0003DMG400030052,PGSC0003DMG400011315,PGSC0003DMG400012101,PGSC0003DMG400033056,PGSC0003DMG400023375,…
GO:0034641	cellular nitrogen compound metabolic process	1.22326e+09	1.22326e+09	1	PGSC0003DMG400030613,PGSC0003DMG400009231,PGSC0003DMG401005881,PGSC0003DMG400030365,PGSC0003DMG400007429,PGSC0003DMG400004436,PGSC0003DMG401001978,PGSC0003DMG401011647,PGSC0003DMG400002597,PGSC0003DMG400022607,PGSC0003DMG400031345,PGSC0003DMG400019677,PGSC0003DMG400007830,PGSC0003DMG400020772,PGSC0003DMG400004124,PGSC0003DMG400030868,PGSC0003DMG400011264,PGSC0003DMG400004838,PGSC0003DMG400020148,…
GO:0009059	macromolecule biosynthetic process	1.48196e+09	1.48196e+09	1	PGSC0003DMG400009231,PGSC0003DMG401005881,PGSC0003DMG400007429,PGSC0003DMG400002597,PGSC0003DMG400031345,PGSC0003DMG400019677,PGSC0003DMG400007830,PGSC0003DMG400020772,PGSC0003DMG400004124,PGSC0003DMG400030868,PGSC0003DMG400004838,PGSC0003DMG400020148,PGSC0003DMG400018180,PGSC0003DMG400005642,PGSC0003DMG400020566,PGSC0003DMG400025212,PGSC0003DMG400026909,PGSC0003DMG400007336,PGSC0003DMG400026987,…
GO:1901576	organic substance biosynthetic process	2.15887e+09	2.15887e+09	1	PGSC0003DMG400025199,PGSC0003DMG400009231,PGSC0003DMG401005881,PGSC0003DMG400007429,PGSC0003DMG400004436,PGSC0003DMG401011647,PGSC0003DMG400002597,PGSC0003DMG400022088,PGSC0003DMG400022607,PGSC0003DMG400031345,PGSC0003DMG400019677,PGSC0003DMG400007830,PGSC0003DMG400020772,PGSC0003DMG400004124,PGSC0003DMG400030868,PGSC0003DMG400030812,PGSC0003DMG400011264,PGSC0003DMG400004838,PGSC0003DMG400020148,…
GO:0044249	cellular biosynthetic process	4.10951e+08	4.10951e+08	1	PGSC0003DMG400025199,PGSC0003DMG400009231,PGSC0003DMG401005881,PGSC0003DMG400007429,PGSC0003DMG400004436,PGSC0003DMG401011647,PGSC0003DMG400002597,PGSC0003DMG400022607,PGSC0003DMG400031345,PGSC0003DMG400019677,PGSC0003DMG400007830,PGSC0003DMG400020772,PGSC0003DMG400004124,PGSC0003DMG400030868,PGSC0003DMG400030812,PGSC0003DMG400011264,PGSC0003DMG400004838,PGSC0003DMG400020148,PGSC0003DMG400018180,…
GO:0009058	biosynthetic process	0.0000017294175685583378	0.0000017294175685583378	1	PGSC0003DMG400025199,PGSC0003DMG400009231,PGSC0003DMG401005881,PGSC0003DMG400007429,PGSC0003DMG400004436,PGSC0003DMG401011647,PGSC0003DMG400002597,PGSC0003DMG400022088,PGSC0003DMG400022607,PGSC0003DMG400031345,PGSC0003DMG400019677,PGSC0003DMG400007830,PGSC0003DMG400020772,PGSC0003DMG400004124,PGSC0003DMG400030868,PGSC0003DMG400030812,PGSC0003DMG400011264,PGSC0003DMG400004838,PGSC0003DMG400020148,…
GO:0008152	metabolic process	0.00020876181323616405	0.00020876181323616405	1	PGSC0003DMG400031765,PGSC0003DMG400018283,PGSC0003DMG400020269,PGSC0003DMG401001731,PGSC0003DMG400014388,PGSC0003DMG400012395,PGSC0003DMG400012408,PGSC0003DMG400030613,PGSC0003DMG400002601,PGSC0003DMG400025199,PGSC0003DMG400009231,PGSC0003DMG401005881,PGSC0003DMG400030365,PGSC0003DMG400020107,PGSC0003DMG400008356,PGSC0003DMG401012699,PGSC0003DMG402025083,PGSC0003DMG400025299,PGSC0003DMG400007429,…
GO:0044237	cellular metabolic process	0.0018666440163688791	0.0018666440163688791	1	PGSC0003DMG400031765,PGSC0003DMG400020269,PGSC0003DMG401001731,PGSC0003DMG400012395,PGSC0003DMG400012408,PGSC0003DMG400030613,PGSC0003DMG400002601,PGSC0003DMG400025199,PGSC0003DMG400009231,PGSC0003DMG401005881,PGSC0003DMG400030365,PGSC0003DMG400020107,PGSC0003DMG400008356,PGSC0003DMG401012699,PGSC0003DMG402025083,PGSC0003DMG400007429,PGSC0003DMG400004436,PGSC0003DMG400019698,PGSC0003DMG401001978,…
GO:0043933	protein-containing complex subunit organization	0.0026513603458910534	0.0026513603458910534	1	PGSC0003DMG400028624,PGSC0003DMG400030426,PGSC0003DMG400009231,PGSC0003DMG400007429,PGSC0003DMG400018104,PGSC0003DMG400018557,PGSC0003DMG400012003,PGSC0003DMG400007830,PGSC0003DMG400008502,PGSC0003DMG400007336,PGSC0003DMG400017893,PGSC0003DMG400011315,PGSC0003DMG400023375,PGSC0003DMG400030339,PGSC0003DMG400019215,PGSC0003DMG400023925,PGSC0003DMG400013270,PGSC0003DMG400008445,PGSC0003DMG400001128
GO:0000302	response to reactive oxygen species	0.004698112178092741	0.004698112178092741	1	PGSC0003DMG401001731,PGSC0003DMG400028624,PGSC0003DMG400030426,PGSC0003DMG400000417,PGSC0003DMG400029408,PGSC0003DMG400009906,PGSC0003DMG400030339
GO:0071704	organic substance metabolic process	0.007024782183786342	0.007024782183786342	1	PGSC0003DMG400031765,PGSC0003DMG400018283,PGSC0003DMG400020269,PGSC0003DMG400014388,PGSC0003DMG400012395,PGSC0003DMG400012408,PGSC0003DMG400030613,PGSC0003DMG400025199,PGSC0003DMG400009231,PGSC0003DMG401005881,PGSC0003DMG400030365,PGSC0003DMG400020107,PGSC0003DMG400008356,PGSC0003DMG401012699,PGSC0003DMG400025299,PGSC0003DMG400007429,PGSC0003DMG400004436,PGSC0003DMG400019698,PGSC0003DMG401001978,…
GO:0009987	cellular process	0.012013250206917219	0.012013250206917219	1	PGSC0003DMG400031765,PGSC0003DMG400020269,PGSC0003DMG401001731,PGSC0003DMG400028624,PGSC0003DMG400012395,PGSC0003DMG400012408,PGSC0003DMG400030613,PGSC0003DMG400002601,PGSC0003DMG400030426,PGSC0003DMG400025199,PGSC0003DMG400009231,PGSC0003DMG401005881,PGSC0003DMG400030365,PGSC0003DMG400020107,PGSC0003DMG400008356,PGSC0003DMG401000859,PGSC0003DMG401012699,PGSC0003DMG402025083,PGSC0003DMG400007429,…
GO:0022618	ribonucleoprotein complex assembly	0.015125985750639188	0.015125985750639188	1	PGSC0003DMG400009231,PGSC0003DMG400007429,PGSC0003DMG400007336,PGSC0003DMG400011315,PGSC0003DMG400019215,PGSC0003DMG400023925,PGSC0003DMG400013270,PGSC0003DMG400008445,PGSC0003DMG400001128
GO:0071826	ribonucleoprotein complex subunit organization	0.018292159953717236	0.018292159953717236	1	PGSC0003DMG400009231,PGSC0003DMG400007429,PGSC0003DMG400007336,PGSC0003DMG400011315,PGSC0003DMG400019215,PGSC0003DMG400023925,PGSC0003DMG400013270,PGSC0003DMG400008445,PGSC0003DMG400001128
GO:0006807	nitrogen compound metabolic process	0.02157791027285174	0.02157791027285174	1	PGSC0003DMG400018283,PGSC0003DMG400014388,PGSC0003DMG400012408,PGSC0003DMG400030613,PGSC0003DMG400025199,PGSC0003DMG400009231,PGSC0003DMG401005881,PGSC0003DMG400030365,PGSC0003DMG400020107,PGSC0003DMG400008356,PGSC0003DMG400007429,PGSC0003DMG400004436,PGSC0003DMG400019698,PGSC0003DMG401001978,PGSC0003DMG400031224,PGSC0003DMG401011647,PGSC0003DMG400018104,PGSC0003DMG400002597,PGSC0003DMG401010423,…
GO:0042542	response to hydrogen peroxide	0.02592579888874584	0.02592579888874584	1	PGSC0003DMG400028624,PGSC0003DMG400030426,PGSC0003DMG400029408,PGSC0003DMG400009906,PGSC0003DMG400030339
GO:0071840	cellular component organization or biogenesis	0.02615696409829743	0.02615696409829743	1	PGSC0003DMG400028624,PGSC0003DMG400030426,PGSC0003DMG400009231,PGSC0003DMG401005881,PGSC0003DMG400030365,PGSC0003DMG400007429,PGSC0003DMG400002765,PGSC0003DMG400018104,PGSC0003DMG400018557,PGSC0003DMG400000408,PGSC0003DMG400012003,PGSC0003DMG400007830,PGSC0003DMG400004124,PGSC0003DMG400008502,PGSC0003DMG400020148,PGSC0003DMG400005642,PGSC0003DMG400007336,PGSC0003DMG400017893,PGSC0003DMG400030052,…
GO:0044238	primary metabolic process	0.030377743440762894	0.030377743440762894	1	PGSC0003DMG400031765,PGSC0003DMG400018283,PGSC0003DMG400020269,PGSC0003DMG400012395,PGSC0003DMG400012408,PGSC0003DMG400030613,PGSC0003DMG400025199,PGSC0003DMG400009231,PGSC0003DMG401005881,PGSC0003DMG400030365,PGSC0003DMG400020107,PGSC0003DMG400008356,PGSC0003DMG400025299,PGSC0003DMG400007429,PGSC0003DMG400004436,PGSC0003DMG400019698,PGSC0003DMG401001978,PGSC0003DMG400031224,PGSC0003DMG401031759,…
GO:0042255	ribosome assembly	0.03471809074925934	0.03471809074925934	1	PGSC0003DMG400007336,PGSC0003DMG400019215,PGSC0003DMG400023925,PGSC0003DMG400013270,PGSC0003DMG400008445,PGSC0003DMG400001128
GO:0022626	cytosolic ribosome	6.36487e-45	6.36487e-45	1	PGSC0003DMG401005881,PGSC0003DMG400021189,PGSC0003DMG400007429,PGSC0003DMG400002597,PGSC0003DMG400004124,PGSC0003DMG400030868,PGSC0003DMG400004838,PGSC0003DMG400020148,PGSC0003DMG400018180,PGSC0003DMG400005642,PGSC0003DMG400020566,PGSC0003DMG400025212,PGSC0003DMG400007336,PGSC0003DMG400026987,PGSC0003DMG400000286,PGSC0003DMG400030052,PGSC0003DMG400001759,PGSC0003DMG400012101,PGSC0003DMG400029266,…
GO:0044391	ribosomal subunit	8.50798e-41	8.50798e-41	1	PGSC0003DMG401005881,PGSC0003DMG400021189,PGSC0003DMG400007429,PGSC0003DMG400002597,PGSC0003DMG400031345,PGSC0003DMG400004124,PGSC0003DMG400030868,PGSC0003DMG400004838,PGSC0003DMG400020148,PGSC0003DMG400018180,PGSC0003DMG400005642,PGSC0003DMG400020566,PGSC0003DMG400025212,PGSC0003DMG400007336,PGSC0003DMG400026987,PGSC0003DMG400000286,PGSC0003DMG400030052,PGSC0003DMG400001759,PGSC0003DMG400012101,…
GO:0005840	ribosome	2.0956e-35	2.0956e-35	1	PGSC0003DMG401005881,PGSC0003DMG400021189,PGSC0003DMG400007429,PGSC0003DMG400002597,PGSC0003DMG400031345,PGSC0003DMG400004124,PGSC0003DMG400030868,PGSC0003DMG400004838,PGSC0003DMG400020148,PGSC0003DMG400018180,PGSC0003DMG400005642,PGSC0003DMG400020566,PGSC0003DMG400025212,PGSC0003DMG400007336,PGSC0003DMG400026987,PGSC0003DMG400000286,PGSC0003DMG400014855,PGSC0003DMG400030052,PGSC0003DMG400001759,…
GO:0022625	cytosolic large ribosomal subunit	7.51115e-27	7.51115e-27	1	PGSC0003DMG401005881,PGSC0003DMG400007429,PGSC0003DMG400002597,PGSC0003DMG400030868,PGSC0003DMG400004838,PGSC0003DMG400020148,PGSC0003DMG400018180,PGSC0003DMG400025212,PGSC0003DMG400026987,PGSC0003DMG400012101,PGSC0003DMG400029266,PGSC0003DMG400010291,PGSC0003DMG400019215,PGSC0003DMG400024723,PGSC0003DMG400007707,PGSC0003DMG400031258,PGSC0003DMG402015759,PGSC0003DMG400013598,PGSC0003DMG400011741,…
GO:1990904	ribonucleoprotein complex	4.5259e-26	4.5259e-26	1	PGSC0003DMG400009231,PGSC0003DMG401005881,PGSC0003DMG400021189,PGSC0003DMG400007429,PGSC0003DMG400002765,PGSC0003DMG400002597,PGSC0003DMG400031345,PGSC0003DMG400004124,PGSC0003DMG400030868,PGSC0003DMG400004838,PGSC0003DMG400020148,PGSC0003DMG400018180,PGSC0003DMG400005642,PGSC0003DMG400020566,PGSC0003DMG400025212,PGSC0003DMG400007336,PGSC0003DMG400026987,PGSC0003DMG400000286,PGSC0003DMG400030052,…
GO:0005829	cytosol	1.85125e-23	1.85125e-23	1	PGSC0003DMG400014388,PGSC0003DMG400012408,PGSC0003DMG401005881,PGSC0003DMG401012699,PGSC0003DMG400021189,PGSC0003DMG400007429,PGSC0003DMG400004436,PGSC0003DMG400018104,PGSC0003DMG400002597,PGSC0003DMG400022088,PGSC0003DMG400031345,PGSC0003DMG400012003,PGSC0003DMG400004124,PGSC0003DMG400030868,PGSC0003DMG400004838,PGSC0003DMG400020148,PGSC0003DMG400018180,PGSC0003DMG400005642,PGSC0003DMG400020566,…
GO:0015934	large ribosomal subunit	5.7968e-23	5.7968e-23	1	PGSC0003DMG401005881,PGSC0003DMG400007429,PGSC0003DMG400002597,PGSC0003DMG400030868,PGSC0003DMG400004838,PGSC0003DMG400020148,PGSC0003DMG400018180,PGSC0003DMG400025212,PGSC0003DMG400026987,PGSC0003DMG400012101,PGSC0003DMG400029266,PGSC0003DMG400010291,PGSC0003DMG400019215,PGSC0003DMG400024723,PGSC0003DMG400007707,PGSC0003DMG400031258,PGSC0003DMG402015759,PGSC0003DMG400013598,PGSC0003DMG400011741,…
GO:0043228	non-membrane-bounded organelle	1.01213e-14	1.01213e-14	1	PGSC0003DMG401005881,PGSC0003DMG400021189,PGSC0003DMG400007429,PGSC0003DMG400002765,PGSC0003DMG400010304,PGSC0003DMG400002597,PGSC0003DMG400018557,PGSC0003DMG400031345,PGSC0003DMG400004124,PGSC0003DMG400030868,PGSC0003DMG400004838,PGSC0003DMG400020148,PGSC0003DMG400018180,PGSC0003DMG400005642,PGSC0003DMG400020566,PGSC0003DMG400025212,PGSC0003DMG400007336,PGSC0003DMG400026987,PGSC0003DMG400000286,…
GO:0043232	intracellular non-membrane-bounded organelle	1.01213e-14	1.01213e-14	1	PGSC0003DMG401005881,PGSC0003DMG400021189,PGSC0003DMG400007429,PGSC0003DMG400002765,PGSC0003DMG400010304,PGSC0003DMG400002597,PGSC0003DMG400018557,PGSC0003DMG400031345,PGSC0003DMG400004124,PGSC0003DMG400030868,PGSC0003DMG400004838,PGSC0003DMG400020148,PGSC0003DMG400018180,PGSC0003DMG400005642,PGSC0003DMG400020566,PGSC0003DMG400025212,PGSC0003DMG400007336,PGSC0003DMG400026987,PGSC0003DMG400000286,…
GO:0005737	cytoplasm	4.1643e-07	4.1643e-07	1	PGSC0003DMG400031765,PGSC0003DMG400020269,PGSC0003DMG401001731,PGSC0003DMG400008824,PGSC0003DMG400028624,PGSC0003DMG400014388,PGSC0003DMG400012395,PGSC0003DMG400012408,PGSC0003DMG400002601,PGSC0003DMG400030426,PGSC0003DMG400025199,PGSC0003DMG400009231,PGSC0003DMG401005881,PGSC0003DMG400020107,PGSC0003DMG400028641,PGSC0003DMG400008356,PGSC0003DMG401000859,PGSC0003DMG401012699,PGSC0003DMG400021189,…
GO:0032991	protein-containing complex	8.63611e-09	8.63611e-09	1	PGSC0003DMG400009231,PGSC0003DMG401005881,PGSC0003DMG400021189,PGSC0003DMG400007429,PGSC0003DMG400002765,PGSC0003DMG400010304,PGSC0003DMG400031224,PGSC0003DMG401011647,PGSC0003DMG400018104,PGSC0003DMG400002597,PGSC0003DMG401010423,PGSC0003DMG400030017,PGSC0003DMG400022607,PGSC0003DMG400031345,PGSC0003DMG400012003,PGSC0003DMG400004124,PGSC0003DMG400030868,PGSC0003DMG400023519,PGSC0003DMG400025645,…
GO:0022627	cytosolic small ribosomal subunit	2.26064	2.26064	1	PGSC0003DMG400021189,PGSC0003DMG400004124,PGSC0003DMG400005642,PGSC0003DMG400020566,PGSC0003DMG400007336,PGSC0003DMG400000286,PGSC0003DMG400030052,PGSC0003DMG400001759,PGSC0003DMG400006991,PGSC0003DMG400024838,PGSC0003DMG400009588,PGSC0003DMG400027045,PGSC0003DMG400033684,PGSC0003DMG400021170,PGSC0003DMG400007685,PGSC0003DMG401005911,PGSC0003DMG400001128
GO:0015935	small ribosomal subunit	28.9449	28.9449	1	PGSC0003DMG400021189,PGSC0003DMG400031345,PGSC0003DMG400004124,PGSC0003DMG400005642,PGSC0003DMG400020566,PGSC0003DMG400007336,PGSC0003DMG400000286,PGSC0003DMG400030052,PGSC0003DMG400001759,PGSC0003DMG400006991,PGSC0003DMG400024838,PGSC0003DMG400009588,PGSC0003DMG400027045,PGSC0003DMG400033684,PGSC0003DMG400021170,PGSC0003DMG400007685,PGSC0003DMG401005911,PGSC0003DMG400001128
GO:0005622	intracellular anatomical structure	6112.68	6112.68	1	PGSC0003DMG400031765,PGSC0003DMG400020269,PGSC0003DMG401001731,PGSC0003DMG400008824,PGSC0003DMG400028624,PGSC0003DMG400014388,PGSC0003DMG400012395,PGSC0003DMG400012408,PGSC0003DMG400002601,PGSC0003DMG400030426,PGSC0003DMG400025199,PGSC0003DMG400009231,PGSC0003DMG401005881,PGSC0003DMG400030365,PGSC0003DMG400020107,PGSC0003DMG400028641,PGSC0003DMG400008356,PGSC0003DMG401000859,PGSC0003DMG401012699,…
GO:0043229	intracellular organelle	0.000010145096795881476	0.000010145096795881476	1	PGSC0003DMG401001731,PGSC0003DMG400008824,PGSC0003DMG400014388,PGSC0003DMG400012395,PGSC0003DMG400012408,PGSC0003DMG400002601,PGSC0003DMG400025199,PGSC0003DMG401005881,PGSC0003DMG400030365,PGSC0003DMG400028641,PGSC0003DMG400008356,PGSC0003DMG401000859,PGSC0003DMG400021189,PGSC0003DMG400007429,PGSC0003DMG400002765,PGSC0003DMG401001978,PGSC0003DMG400010304,PGSC0003DMG400020488,PGSC0003DMG400031224,…
GO:0043226	organelle	0.000011048547786320864	0.000011048547786320864	1	PGSC0003DMG401001731,PGSC0003DMG400008824,PGSC0003DMG400014388,PGSC0003DMG400012395,PGSC0003DMG400012408,PGSC0003DMG400002601,PGSC0003DMG400025199,PGSC0003DMG401005881,PGSC0003DMG400030365,PGSC0003DMG400028641,PGSC0003DMG400008356,PGSC0003DMG401000859,PGSC0003DMG400021189,PGSC0003DMG400007429,PGSC0003DMG400002765,PGSC0003DMG401001978,PGSC0003DMG400010304,PGSC0003DMG400020488,PGSC0003DMG400031224,…
GO:0034098	VCP-NPL4-UFD1 AAA ATPase complex	0.005387442949823699	0.005387442949823699	1	PGSC0003DMG400018104,PGSC0003DMG400012003,PGSC0003DMG402005570
KEGG:03010	Ribosome	5.05727e-17	5.05727e-17	1	PGSC0003DMG401005881,PGSC0003DMG400021189,PGSC0003DMG400007429,PGSC0003DMG400031345,PGSC0003DMG400004124,PGSC0003DMG400030868,PGSC0003DMG400004838,PGSC0003DMG400020148,PGSC0003DMG400018180,PGSC0003DMG400005642,PGSC0003DMG400020566,PGSC0003DMG400025212,PGSC0003DMG400007336,PGSC0003DMG400026987,PGSC0003DMG400014855,PGSC0003DMG400030052,PGSC0003DMG400012101,PGSC0003DMG400010291,PGSC0003DMG400004686,…
